# Supplementary material for: Which Global Cycle? A Stochastic Factor Selection Approach for Global Macro-Financial Cycles
Source: publisher site journal article supplement (doi:10.1515/snde-2023-0093), 2024-08-08
Supplement: Supplementary file 1 [file gmfcy_data.xlsx]

## Sheet: Readme
	Countries						Variables		Definition		Adjustment	Sources
	DE	=	Germany		Macro	1	REAL GDP		REAL GDP		SA	OECD via Dbnomics
	FR	=	France
	IT	=	Italy
	ES	=	Spain
	NL	=	Netherlands		Financial
	BE	=	Belgium			5	INFLOWS		GROSS CAPITAL INFLOWS			Forbes/IMF BP6
	AT	=	Austria			6	OUTFLOWS		GROSS CAPITAL OUTFLOWS			Forbes/IMF BP6
	FI	=	Finland				HOT INFLOWS		GROSS CAPITAL INFLOWS - FDI INFLOWS			Forbes/IMF BP6
	GR	=	Greece				HOT OUTFLOWS		GROSS CAPITAL OUTFLOWS - FDI OUTFLOWS			Forbes/IMF BP6
	IE	=	Ireland				CREDIT		Total Credit			BIS via DBnomics
	PT	=	Portugal				LOANS		Bank Loans			BIS via DBnomics
	US	=	United States				ASSETS					IMF BP6
	UK	=	United Kingdom				LIABILITIES					IMF BP6
	JP	=	Japan
	CA	=	Canada
	AU	=	Australia
	KO	=	South Korea
	NZ	=	Nez Zealand
	NO	=	Norway
	SE	=	Sweden
	CH	=	Switzerland
	DK	=	Denmark

## Sheet: GDP
	AUS	AUT	BEL	CAN	CHE	DEU	DNK	ESP	FIN	FRA	GBR	IRL	ITA	JPN	KOR	LUX	NLD	NOR	NZL	SWE	USA
1980-Q1	151130			209975	90471.9					290923	244829				43797300			367094			1710506
1980-Q2	151518			209908	90796.4					289314	239940				43561000			359595			1.67526e+06
1980-Q3	152321			209667	91213.8					289076	239690				44385600			353117			1.67327e+06
1980-Q4	154964			212561	91776.5					288697	237071				43158000			360743			1.70448e+06
1981-Q1	155547			217246	91677.6					289960	236943				44934000			366851			1.73787e+06
1981-Q2	157951			219688	92629.3					291877	237479				46019400			368373			1724995
1981-Q3	161127			217715	93108.8					293781	240075				47935100			363779			1.74565e+06
1981-Q4	160501			216718	92702.3					295162	240369				48687100			363686			1.72663e+06
1982-Q1	159179			214169	92012.1					297782	240798				49017500			366234			1.69981e+06
1982-Q2	160614			211691	91483.9					299758	243332				50168600			366271			1.70756e+06
1982-Q3	159534			209835	90785.5					299910	243927				51209100			366163			1.70103e+06
1982-Q4	157026			207899	90512.6					301438	245627				52820600			367334			1.70171e+06
1983-Q1	155440			211377	91307.9					303172	250178				55160800			374286			1.72414e+06
1983-Q2	155154			215532	91478.4					303049	252248				56864000			378415			1763375
1983-Q3	159480			217942	91876.8					303296	254981				58975700			383646			1798626
1983-Q4	162156			220688	92198.2					305053	257154				59397900			383789			1.83615e+06
1984-Q1	166224			224485	93299.7					306929	258948				62000300			394084			1.87204e+06
1984-Q2	168090			228876	93764					308068	256664				63554300			396530			1.90439e+06
1984-Q3	169516			229838	95405.7					309499	258309				64420700			408011			1.92275e+06
1984-Q4	170706			233480	96179.7					310379	263374				64733800			416486			1.93853e+06
1985-Q1	173175			237028	97309.6					310756	265480				66553400			424652			1957315
1985-Q2	177005			237783	98141.6					312744	271155				68156600			418818			1.97455e+06
1985-Q3	179397			240800	98278.9					315097	271404				68932000			430994			2.0047e+06
1985-Q4	178956			244496	99176.4					316113	272045				71033500			435153			2.0196e+06
1986-Q1	180099			244422	99706.2					317249	275127				72401200			443312			2.03846e+06
1986-Q2	179779			245812	100185					320819	277167				75222800			437300			2047638
1986-Q3	180286			246122	100097					321867	278438				78470300			448714			2.06723e+06
1986-Q4	183275			244344	99966.5					323056	283425				79694300			451171			2.07833e+06
1987-Q1	185026			249982	100142					323852	286089				82253700			449282			2.09382e+06
1987-Q2	187936			253211	100897					327578	290275				86327900			459154	26672		2.11641e+06
1987-Q3	191344			257065	102168					329823	297303				87170200			447181	26747		2.13477e+06
1987-Q4	195226			260386	102968					335393	300606				88944400			455291	26764		2.17142e+06
1988-Q1	196055			264182	103225					339521	305824				95796000			453591	26802		2.18264e+06
1988-Q2	196196			266522	103872					341539	307500				93726100			446637	26772		2211320
1988-Q3	197798			266546	105052					346001	312065				96674400			450411	27251		2.22428e+06
1988-Q4	200926			268405	106891					349652	314663				99820800			451056	27392		2.25392e+06
1989-Q1	202965			271467	107230					354053	315946				99864000			448108	27781		2.27683e+06
1989-Q2	207246			272504	109171					356990	317925				101322600			453393	27919		2.29421e+06
1989-Q3	208991			273479	109952					360865	318139				103920900			457804	26783		2311204
1989-Q4	208427			272896	111403					366352	318355				108212600			461009	27376		2.31576e+06
1990-Q1	210082			275468	113318				35966	368219	320418				109314800			459332	27660		2.34106e+06
1990-Q2	210347			274328	113979				35471	369626	321991				111753200			464294	27535		2.34956e+06
1990-Q3	209146			272386	113562				34711	371348	318578				115366100			459728	27582		2.35112e+06
1990-Q4	210386			269959	113071				34512	372686	317429				117711800			472038	28240		2329719
1991-Q1	207669			266106	113236	557422			33839	372119	316429				122126200			476044	27142		2318819
1991-Q2	207328			267347	112154	554472			33434	373239	315958				124155300			478533	26905		2.3369e+06
1991-Q3	208230			267705	112154	553261			32746	374354	315193				126818800			477364	27261		2.34871e+06
1991-Q4	208357			268199	112552	560449			32362	376172	315669				129993800			480864	27212		2.3569e+06
1992-Q1	209948			268395	113402	568978			32466	379836	315631				132308200			491090	27408		2385111
1992-Q2	211452			268722	112950	564591			32101	379615	315196				133236600			493651	27684		2.41097e+06
1992-Q3	213542			270166	111800	563607			31839	379729	317131				133326700			500118	27148		2.4348e+06
1992-Q4	217962			271702	110944	561792			31614	378859	319248				135407500			496538	27409		2.46019e+06
1993-Q1	219508			273441	110772	557744			31688	376770	321451				138103000			493271	27998	650287	2.4643e+06
1993-Q2	220789			275931	111996	557592			31627	376911	322977				141645800			501835	28253	658748	2.47864e+06
1993-Q3	221060			278560	112394	560921			31808	377416	325512				144257300			511834	29060	667738	2.49047e+06
1993-Q4	225120			279763	113063	560392			32048	378427	327688				147017900			530045	29548	666624	2.52434e+06
1994-Q1	228797			283886	113624	568222			32261	381187	331506			111576825	151306200			524002	30469	674237	2.54883e+06
1994-Q2	231539			288034	112447	569584			32541	385348	335294			110935875	153774900			536205	30587	681107	2.58337e+06
1994-Q3	233325			291716	113655	573594			33284	387427	338943			112236225	156361700			528921	30636	689014	2.59847e+06
1994-Q4	235763			293845	114219	580326			34122	390869	340781			111792100	162507400			549824	30926	699467	2.62824e+06
1995-Q1	235857	59780.2	71086	296576	113770	578397	360820	177507	33840	393090	342037	24127.1		113028225	165904600	6788.3		545529	31354	708422	2.63756e+06
1995-Q2	236805	60232.5	71385	296696	113862	582634	359788	178608	34749	394979	343279	24314		114069000	169258900	6859.5		550289	31912	711572	2.64543e+06
1995-Q3	242148	60427.6	71813	297087	114419	583769	361288	179329	34592	395293	346656	24567.8		115427150	172772500	6930.8		563256	32003	715149	2.66793e+06
1995-Q4	242085	61003.1	71961	298304	114486	583920	363932	180692	34609	395953	347458	24643.5		115714750	176004300	7005		570205	32371	722379	2.68605e+06
1996-Q1	246064	61197.9	71816	298510	115112	579078	363986	181760	35233	398444	349384	26026.2	379828	116654950	179362700	7088.2	119388	578817	32549	727343	2.70617e+06
1996-Q2	247753	61726	72320	300588	114659	586946	373843	183102	35511	399125	350120	26340.3	379428	118123375	182986100	6590.7	120719	578024	32978	721272	2.7513e+06
1996-Q3	249672	61937.2	72653	303185	114304	589065	374900	184671	35717	401589	353981	25985.7	379990	118285625	186204700	7102	122410	597286	33374	724786	2.77598e+06
1996-Q4	251978	62029.4	73226	305627	115018	593377	375028	185656	36386	402085	359441	26199.9	378833	119616500	189354500	7197.8	123280	587704	33504	729596	2.80481e+06
1997-Q1	253543	62377.3	73960	309658	115983	590199	379735	187541	36815	403307	365887	27880.4	380105	119920950	190240800	7243.2	124625	603484	33303	736083	2.82292e+06
1997-Q2	261081	62579.1	75104	313156	116558	597841	386257	189242	37374	407951	368979	28946.6	385149	119004175	196995400	7330.9	125922	618041	34133	744977	2.86983e+06
1997-Q3	261450	63350.5	75766	316862	117974	599884	385166	191493	38255	411152	371488	29256.4	387735	119250625	198555100	7414.1	127752	617377	34783	750664	2.90573e+06
1997-Q4	265231	64031.2	76188	319931	118832	604196	385114	194134	39382	415638	375935	29599.7	394637	119300900	197649700	7497.2	129391	626099	34214	765770	2.93068e+06
1998-Q1	267017	64511.9	76386	324450	120052	609908	390921	195835	39095	419133	378525	30702.7	391789	117842425	184173900	7577.5	131136	632140	34174	768801	2959969
1998-Q2	269467	65204.4	76640	324623	121219	607260	387968	198044	39884	423033	381241	31439.1	393987	117321650	182685900	7843.7	132075	639303	34024	779270	2987373
1998-Q3	274557	65615.6	76864	327578	121322	610286	395096	199915	40385	425947	383238	32439.1	394614	117535775	185877700	7988.7	133202	627836	34239	783518	3.0248e+06
1998-Q4	278680	65873.2	77036	332035	120982	607638	396364	202111	40743	429200	386036	31369	392674	118484750	190517300	8038	134421	631047	35044	792620	3.07368e+06
1999-Q1	280753	66318.2	77841	338057	121228	614674	399955	204129	41415	431377	388351	33549.6	395068	116852325	196298800	8258.6	136662	635610	35378	801539	3.10269e+06
1999-Q2	281660	67183.2	78906	340885	122030	614674	402020	206550	41635	434926	389518	34098.9	396481	117293775	204902900	8436.9	138182	635900	35655	806773	3128602
1999-Q3	284916	68049.3	80052	346219	122712	621785	404505	209296	41857	440249	395738	35219.1	399999	117918850	210601600	8679.6	140086	648966	36209	813043	3.16999e+06
1999-Q4	289774	68450.3	81000	351089	125727	626551	410163	211670	42214	446398	401153	35782.2	406247	117961600	216680100	8644.1	142056	660130	36607	828351	3.22207e+06
2000-Q1	290941	69225.8	81576	356706	126713	635517	414163	215056	43473	450473	405110	36406.4	410396	119964375	220786300	9091.5	142941	669888	37522	833881	3233813
2000-Q2	293669	69655	82163	360946	127226	640737	418878	217749	43808	454921	407731	37632.6	413734	120532675	223728300	8972.5	144537	660214	37197	854810	3.29269e+06
2000-Q3	294398	69964.7	82544	364616	128199	640586	420035	220099	44494	457765	409290	38251	416272	120563500	229891100	9128.9	145730	666622	37323	861600	3.29597e+06
2000-Q4	293351	71071.5	83351	365240	129591	638618	424142	222367	44967	461485	410460	38351.3	422283	121735225	229145200	9182.5	147624	666884	37616	859018	3.31556e+06
2001-Q1	296385	70829.7	83398	367175	129667	651461	419537	224728	45187	464014	413970	39327.5	425093	122638975	231953500	9332.3	147784	674686	37299	862199	3.30481e+06
2001-Q2	298796	70655.6	83413	368164	130360	651083	421585	226389	45241	464873	415874	39997.5	423414	121718525	234966300	9216	148532	673487	38524	862247	3.32535e+06
2001-Q3	302371	70691.5	83254	367919	130135	650024	425370	228499	45527	466130	417821	39674.7	422209	120392400	238138800	9348.6	148790	681778	38444	865560	3.31204e+06
2001-Q4	306034	71095.4	83171	370159	129977	649267	424531	230080	45399	466250	418764	40280.3	421459	119981850	242336200	9593.2	149270	687703	38952	872953	3.32122e+06
2002-Q1	308370	71701.3	83886	375653	129882	645862	424389	231059	45696	467993	420979	41424.4	421926	120184300	248502400	9633.3	148359	680634	39426	871633	3.34873e+06
2002-Q2	313643	72066.4	84604	377867	130147	648737	424346	232942	46148	470150	423711	41733.5	423652	121158175	253005600	9802.7	148876	694776	39751	885430	3369339
2002-Q3	314598	72315.6	85057	381138	130439	651915	425790	234378	46040	472110	426683	42544.2	424621	121538800	258120900	9650.4	149107	684465	40524	890660	3.38294e+06
2002-Q4	317160	71984.2	85375	383228	129831	651007	424384	236161	46564	471881	430438	42939.3	426198	121876800	260953400	9616.5	149330	692194	41403	891994	3.38736e+06
2003-Q1	317802	72515.1	85150	385349	128874	641304	426659	238359	46235	472816	432853	42724.6	424724	121952950	259233300	9604.2	149356	692359	41519	902513	3.40486e+06
2003-Q2	319128	72612.9	85332	384781	128965	642061	422691	239601	46900	471797	436157	42981	424046	122791425	258833700	9845.3	148840	689062	41693	897153	3.43528e+06
2003-Q3	324677	72844.9	85681	386218	130239	646978	424142	241181	47461	474977	440440	43348.8	423740	123153400	263836100	9949.6	148972	698744	42189	910294	3.49254e+06
2003-Q4	329989	72950.2	86277	388883	131814	648718	432044	243266	47548	478409	443924	45569.9	427704	124493425	270800000	10323.9	149770	698968	42847	915910	3.53284e+06
2004-Q1	332582	73654.3	87570	391684	132574	647602	434125	244733	48155	482873	445908	45513.3	428614	125407675	274198000	10257.6	151125	723730	43908	932892	3553085
2004-Q2	334795	74277.8	88412	396337	133554	650856	436710	247124	48569	485990	448330	46567.9	430433	125428325	276291500	10269.7	151846	725220	43921	936608	3.58075e+06
2004-Q3	337391	74999.6	89183	401015	133606	649645	437739	249448	49096	487265	449436	46331	430386	126195475	277412100	10509.7	152073	716846	43959	944049	3614458
2004-Q4	339904	75252.6	89501	403896	133825	648964	442470	251155	49835	490924	451003	47394.3	431506	125950450	279514700	10396.3	152404	723889	44079	952018	3.6514e+06
2005-Q1	342508	75224.3	89972	405294	134865	648983	440864	253607	50328	492245	453744	48331.7	430630	126599225	281893100	10310.3	152896	735689	44159	955956	3.69196e+06
2005-Q2	344019	76068.3	90511	408234	136503	652388	449544	255844	49726	493183	458115	49266.6	433837	127587900	287212600	10394.2	153972	739547	45275	962520	3.70993e+06
2005-Q3	347901	76640.9	90869	413180	138051	657986	450045	258318	50446	495627	462156	48809.6	436547	128881925	291536100	10603.9	156040	745682	45363	973939	3.73907e+06
2005-Q4	350518	77323.2	91566	417265	139358	661088	451506	260937	50591	499515	467203	50319.5	437205	129105075	294487800	11153.5	157024	747360	45417	980571	3760308
2006-Q1	350930	78176	92129	420649	140904	667481	457180	263925	51853	503316	469679	51224.7	438164	129303400	299314800	11163	158003	752143	45855	995750	3811022
2006-Q2	351665	78458	92456	420866	142111	678980	470815	266483	51980	508361	471304	51365.8	441118	129515475	301501600	11194.6	160369	753083	45696	1011962	3.82038e+06
2006-Q3	356952	79368.3	93270	422042	143318	684200	467675	268959	52474	508443	472400	51991.5	443007	129256425	306367700	11249.9	161328	760811	46562	1023916	3.82613e+06
2006-Q4	361491	80203.2	94329	423724	145186	694565	466408	271545	52886	512462	475414	52120.7	448640	130988100	308755400	11414	162658	774736	46914	1030684	3.85841e+06
2007-Q1	366514	80942.2	95666	426434	146003	695095	467953	274029	53908	516292	479140	55192.9	447947	131855100	313924100	11986.9	164522	775319	47280	1040726	3869739
2007-Q2	368852	81893.2	96103	430566	148116	700920	465857	276485	54877	520205	481362	54362.7	448751	131917025	319355900	12251.8	165364	775306	47925	1045922	3.89444e+06
2007-Q3	373120	82162.3	96845	432374	149503	704400	470234	278605	55381	522047	484647	52980.2	449763	131201300	323104600	12161.8	167211	785255	48413	1054087	3.9179e+06
2007-Q4	374569	82875.1	97238	432865	151103	709091	474964	280396	56112	523289	486514	55151.8	448227	131757650	330073800	12258.3	169474	793800	48646	1066112	3.94179e+06
2008-Q1	378448	83418.2	97658	433196	152396	713554	474767	281001	56043	525340	489449	53688.4	453226	132223075	331402000	12389.7	170029	783827	48392	1057659	3.92573e+06
2008-Q2	379675	84104.1	97720	434763	153762	711890	470386	281308	55593	523121	487244	52351.8	448938	131472850	333136800	12253.2	170866	784218	47686	1057311	3.94819e+06
2008-Q3	382397	83561.7	97149	438328	154340	707275	467639	280790	55785	521674	479983	51933.9	443407	129833825	335854800	12152.3	170658	782785	47764	1051850	3.92739e+06
2008-Q4	380530	81694.8	95042	433246	149998	696003	456596	276258	54588	514081	470358	49749.9	431789	126621550	324825700	11704.6	169532	785237	47741	1014603	3.84165e+06
2009-Q1	384006	80296.1	94117	423456	147666	663414	450096	269060	51052	505617	461881	49974.7	420158	120533450	325118000	11483.6	163439	778753	47336	999561	3.79687e+06
2009-Q2	386991	79660.6	94162	418835	148551	664474	441372	269031	50829	505130	460431	49723.3	418821	122899750	329451100	11625.9	163443	771903	47916	1000243	3790443
2009-Q3	388138	80019	95352	420720	150242	668180	442898	269599	51299	505943	460722	49051.5	421258	122845150	339310500	11874.7	164098	772400	48188	999752	3.80416e+06
2009-Q4	390994	80385.4	96117	425626	151503	673098	443300	269544	50903	509492	462152	48408.7	422625	124361075	341844700	11930.2	165087	772812	48805	1004347	3.84479e+06
2010-Q1	392717	80053	96615	430760	152586	678527	447128	269468	51413	511306	465380	49832.2	423758	125669950	348541700	12141.4	164775	787891	49349	1031154	3.86401e+06
2010-Q2	395397	81141.7	97567	433014	153857	693733	450184	269872	52833	513928	470655	49882.9	426926	127179000	355163300	12273.3	165498	779516	49609	1052489	3901407
2010-Q3	398182	81837.5	97974	436083	154743	699558	457321	269734	52616	517255	473954	50111.3	428967	129486375	359266200	12079.4	166229	760172	48887	1065255	3.93157e+06
2010-Q4	401631	82794.8	98469	440956	155908	705232	456292	269915	53721	520924	474526	49855.9	431321	128429300	363646800	12169.5	168103	781512	48356	1082459	3.952e+06
2011-Q1	400452	83552.1	98943	444287	156939	718850	457286	269494	54021	526063	476720	50253.5	433377	127068025	367040100	12315.5	169074	782243	49175	1086340	3.94248e+06
2011-Q2	405688	83717.2	99148	445152	157670	719455	461870	268640	53927	526247	477202	50998.5	433572	125976650	368841500	12196.5	168923	779009	49628	1089799	3.96921e+06
2011-Q3	411165	84292	99432	451294	157077	725886	456125	266899	53993	528168	478726	50075.3	431306	129040575	370782800	12346	168924	791561	50209	1104151	3967671
2011-Q4	415531	84251.2	99722	454848	157247	723616	459853	265168	54008	529108	479335	50143	427216	128857875	372534000	12307.3	167905	791969	50620	1088629	4.01218e+06
2012-Q1	419514	84928.7	99936	455140	158886	725148	459533	262683	53772	529559	482583	49902.2	422578	130626900	375758900	12371.5	167554	809152	50695	1090663	4044992
2012-Q2	422654	84592.9	99935	456624	158798	726510	459879	260158	53203	528752	482299	50941.1	419457	129454475	377885600	12370.6	167641	811060	51008	1092068	4.06343e+06
2012-Q3	425177	84441.4	100178	457246	159912	728628	460311	258832	52998	529765	488205	49946.6	417284	128970625	379592800	12501.3	166922	799303	51300	1090708	4.07054e+06
2012-Q4	427159	84408.9	100132	458192	159750	725375	459567	256858	52957	529376	487000	50363.8	414146	128876400	381499300	12725.2	165754	805836	51894	1082895	4.07501e+06
2013-Q1	429043	84218.1	99857	462302	160454	721990	462158	256037	52503	529327	489236	49634.4	410282	130647425	384792100	12725.4	166289	807050	52179	1098040	4.11037e+06
2013-Q2	430879	84291.2	100440	464984	161902	729706	462501	255813	52745	532820	492451	51040.5	410363	131829325	389278200	12972.4	165988	812880	52008	1096929	4.1161e+06
2013-Q3	434281	84706.8	100751	468774	163132	733943	465431	255673	52929	532885	496229	51959.8	411308	133099725	392778000	12981.6	166989	820853	52474	1101956	4.14869e+06
2013-Q4	437689	85031.5	100971	473699	163668	736137	466367	256099	52834	535438	498839	51712.8	410398	132945550	395825300	12872.9	168049	819398	52764	1109630	4178190
2014-Q1	441077	84827.7	101405	474473	164725	743022	467548	257040	52426	535859	503492	53801	411047	134020600	399509200	13137.3	167890	823666	53333	1118821	4.16356e+06
2014-Q2	443096	85403.2	101674	478806	165825	743022	467209	258231	52511	536518	507551	55922.1	410916	131587450	402904000	12962.6	168873	829753	53587	1127974	4.21703e+06
2014-Q3	445237	85323.7	102376	483398	166731	747031	475030	260142	52714	539195	510988	55946.3	411338	131710825	404288100	13232.1	169294	833241	54249	1136182	4266154
2014-Q4	446756	85455.1	102911	486744	167603	753084	476734	262375	52588	539674	513852	56037.3	410234	132337550	406016200	13572.9	170811	843427	54982	1144895	4.28531e+06
2015-Q1	450904	85683.7	103446	484069	167344	749112	479998	265386	52179	542261	517165	69625.1	411319	134371400	409418100	13467.9	171829	841262	55350	1160965	4.32016e+06
2015-Q2	451392	85837.3	104141	482751	168548	754408	482243	268233	52973	542336	520984	67970.6	412949	134560975	411136300	13562.5	172359	845721	55852	1172564	4.34522e+06
2015-Q3	456138	86350.6	104340	484459	169586	758190	483698	270674	52968	544126	523783	69732.3	413940	134681725	417357100	13497.8	172950	855631	56727	1188921	4359270
2015-Q4	458753	86446.4	104775	484822	170271	761444	484776	273297	53265	544947	527344	70654.5	416128	134484650	420108800	13585.1	172977	848118	57377	1197760	4.36564e+06
2016-Q1	462765	87369.7	104835	487481	171024	767666	490360	275149	53922	548389	529673	68818	417262	135460525	421399700	13982.8	174569	849252	57869	1196587	4.39137e+06
2016-Q2	465827	87234.1	105411	485084	171908	770844	496993	276303	54006	547523	532731	69799.1	418120	135272400	426230000	14185.4	174980	848983	58521	1197593	4.40465e+06
2016-Q3	466470	87727.7	105596	490086	172831	773492	501210	278754	54616	548537	535103	68880.6	420489	135508950	428335700	14287.6	176935	846376	58907	1201374	4.43112e+06
2016-Q4	471212	88628.5	106138	492838	173414	775913	504821	280049	54784	551521	539059	77034.5	421694	135722725	430914800	14357	178417	857712	59054	1212007	4453140
2017-Q1	472375	89065.6	106830	498194	173734	785369	508124	282272	55343	556021	542562	73784	424010	136811175	435062100	14132.6	179340	866243	59842	1217178	4.47416e+06
2017-Q2	475750	89558.4	107088	503291	174255	791497	513804	285303	56048	560568	544248	76054.7	425706	137387875	437982600	14338	180916	874589	60622	1232960	4.4992e+06
2017-Q3	480328	90030.5	107019	505414	175347	798458	511920	286950	56257	564108	546579	78230.4	427331	138429975	444474000	14518.9	182232	880582	61239	1245090	4.53156e+06
2017-Q4	482201	90686.8	107877	508032	177251	804888	515784	288745	56621	568883	548781	82534.6	429624	138576750	443292800	14569.9	183657	875565	62046	1247302	4.57417e+06
2018-Q1	486402	91495.2	108326	512479	179166	801408	518425	289836	56767	569065	550080	83151	429479	138752750	448384100	14619.4	184390	882385	62660	1250388	4.60907e+06
2018-Q2	491017	91825.5	108833	516502	180834	805872	521031	291535	56763	571054	553087	85499	429683	139294250	451225100	14564.8	185544	885039	63433	1264084	4647501
2018-Q3	492928	91940.4	109254	520067	180398	802467	524168	293044	56654	573331	556581	84557	430082	138282750	454330800	14737	186077	890615	63562	1255537	4.6699e+06
2018-Q4	493225	92906.2	110307	521840	180788	805569	526786	295022	56644	577534	558448	85855.4	431248	138019525	458065400	14804.2	186976	890915	64582	1272865	4.68032e+06
2019-Q1	495501	93702	110577	522313	181308	814061	530065	296796	57061	581246	562033	87384.3	432171	138668425	457150700	15008.3	188118	888459	64924	1279611	4.7083e+06
2019-Q2	499288	93220.3	111054	527488	182030	810052	534285	297881	57584	584329	562779	89360.2	433504	139377475	461932600	15263.3	188903	889982	65356	1286430	4745632
2019-Q3	503153	93437.5	111798	529210	182962	813380	536368	299010	57546	584848	565362	89195.6	433412	139394150	463803600	15204.8	189592	891946	66061	1288707	4.77816e+06
2019-Q4	504813	93189.1	112513	530802	183846	812775	533898	300136	57404	582691	565109	90516.9	429962	135579725	469779500	15180.6	190548	904750	66338	1290066	4.80058e+06
2020-Q1	503542	90860.9	108966	519351	181001	798438	531114	283955	57249	549538	550835	93078.3	404572	136166425	463853200	15013.3	187416	892756	65578	1279514	4737998
2020-Q2	469358	80477.8	96287	462001	169871	718624	499285	233831	53721	475546	443817	90251.2	353433	125342575	449238400	14078.6	171718	851167	59516	1179909	4.31455e+06
2020-Q3	485304	89174.1	107740	503507	180513	783610	529875	273111	56413	563909	521910	99113.2	410119	131989350	459271800	15204.6	184607	889362	67841	1262304	4.64019e+06
2020-Q4	500907	87500.3	107616	514546	180395	789435	530323	273719	56935	557780	529647	94918.2	403751	134447950	464517700	15286.4	184608	894991	67309	1264044	4.69194e+06
2021-Q1	510212	87157.6	109033	520581	180249	776140	529975	272343	56864	558728	523440	104158	404986	133716950	472602200	15860.1	183655	894661	68205	1279935	4.76391e+06
2021-Q2	514273	90705.6	110899	515888	183546	793010	542222	275416	57895	566080	552521	108973	415940	134498075	476244600	15864.9	190549	901891	69849	1290671	4.84208e+06
2021-Q3	504638	93778.8	113230	522830	186971	806250	550049	282593	58471	583822	557700	110324	426240	133544100	477726500	15941.2	194426	937331	66765	1314766	4.86972e+06
2021-Q4	521931	92418.6	113713	531338	187504	803451	566472	288873	58883	587949	564812	104408	428833	135052650	483565500	16022.9	196387	937983	68483	1329535	4.95157e+06

## Sheet: INFLOWS
	AU	AT	BL	CA	CH	DE	DK	ES	FI	FR	GB	IL	IT	JP	KR	NL	NO	NZ	SE	US
1980-01-01	0.662	2.317	18.187	6.8911	#N/A	7.7	-0.1653	0.9267	0.6815	6.3	30	0.6701	1.5274	12.14	1.9653	5.1238	0.5788	-0.147	0.5953	11.6
1980-04-01	1.313	1.204	11.116	5.7552	#N/A	5.4	0.0498	2.5586	1.1568	7.9	17.8	0.859	0.8504	10.25	1.5377	2.392	0.0874	0.14	0.1247	10.1
1980-07-01	1.431	2.656	10.324	4.7441	#N/A	5.3	0.0359	1.6296	0.7158	7.1	11.4	0.447	0.6817	13.96	2.5794	3.9784	0.5195	0.429	0.0433	16.6
1980-10-01	1.639	2.03	10.532	6.0132	#N/A	12.2	0.1216	1.2987	0.7345	24	34.1	0.998	18.8464	8.81	1.2608	6.4916	0.8405	0.18	0.5953	24.7
1981-01-01	1.481	0.694	14.428	7.6383	#N/A	15.2	0.7741	1.8585	0.0931	4.4	25	0.0158	-1.7008	16.72	1.4508	3.2087	-0.2908	0.173	1.6744	13.1
1981-04-01	2.656	2.922	6.587	10.8754	#N/A	4.9	0.7657	2.6321	0.7607	2.2	14	0.9679	8.3217	0.99	1.3288	1.7281	0.1432	0.277	-0.3875	13.3
1981-07-01	1.215	0.749	1.905	7.2891	#N/A	5.1	0.3695	1.2311	0.5227	3.4	24.7	0.3367	2.1495	13.84	0.7286	2.2209	0.1514	0.462	0.4866	19.5
1981-10-01	2.67	0.976	-0.511	8.7895	#N/A	3.1	0.914	1.4162	0.7048	17.8	24.9	1.598	17.995	6.09	1.9038	1.5749	0.1898	0.961	0.8785	39.6
1982-01-01	2.628	0.687	8.548	4.8006	#N/A	3	1.2332	1.1183	0.2583	-0.5	20.8	-0.423	-4.9166	12.55	0.3368	3.039	0.5073	0.02	-0.6368	27.3
1982-04-01	5.049	1.177	4.189	3.0506	#N/A	3.6	0.8892	1.8581	0.5738	3.7	2.1	1.6323	1.3456	-9.23	1.1343	-0.8405	-0.1152	0.703	0.1805	39.5
1982-07-01	3.242	-0.398	9.347	-0.3641	#N/A	3.5	0.9226	0.7497	0.8818	4.7	28.2	0.4626	0.7125	9.34	0.7886	-0.5422	1.1126	1.138	0.8918	20.5
1982-10-01	3.198	1.797	9.901	-0.8734	#N/A	3	0.7246	1.3506	1.7344	15.5	0	2.1966	8.0691	0.06	3.0311	2.0313	0.8638	0.813	1.222	17.7
1983-01-01	1.968	-0.817	3.242	3.7885	#N/A	0.9	0.7173	0.9353	0.0708	-1.5	13	-0.2517	-6.4229	12.6	0.2279	-1.592	-0.9115	0.618	-0.5416	15.6
1983-04-01	1.489	2.595	2.141	6.1842	#N/A	2.3	1.3001	0.9809	0.6153	3	0.5	1.6409	7.202	-3.27	0.8412	0.7791	0.1284	-0.192	-0.2587	17.4
1983-07-01	1.967	1.164	16.275	3.0588	#N/A	1.9	1.1575	1.2964	0.1216	4.9	17.8	-0.246	0.1017	11.62	1.257	2.0876	-0.2955	0.355	-0.0586	19
1983-10-01	3.548	2.03	-11.543	1.8785	#N/A	4.2	1.6154	1.4297	1.5077	11.4	6.8	1.4696	14.7951	1.77	1.3638	-0.4891	0.3087	0.764	-0.4422	36.8
1984-01-01	2.115	0.132	12.507	7.6436	#N/A	4.1	0.061	1.8107	-0.3804	-1	18.3	-0.8267	-4.6434	13.27	0.0135	2.344	-0.2779	0.485	-0.1477	26
1984-04-01	1.667	1.302	12.617	6.3603	#N/A	2.7	1.5243	1.9674	2.2497	5	9.4	1.7786	3.46	-0.81	1.19	-1.2019	0.4116	1.266	-2.4175	42.9
1984-07-01	3.279	2.206	5.889	1.8064	#N/A	4.1	1.8522	1.0824	0.7707	3.7	-0.9	-0.2918	0.0617	11.13	0.5031	0.1591	0.7799	0.633	-0.2155	10
1984-10-01	2.593	2.054	4.96	0.9025	#N/A	5.9	1.0066	1.1009	1.9138	11.5	6.1	0.3895	15.6483	5.76	0.8695	1.5147	0.9667	0.882	-0.5985	37.6
1985-01-01	3.187	1.085	25.134	7.2126	#N/A	1.2	1.2776	0.4976	1.05	3.5	15.7	-0.864	1.1197	1.68	1.0824	4.1055	0.5936	0.203	-0.9558	15.2
1985-04-01	2.579	0.166	5.072	-1.2962	#N/A	3.5	2.0004	-0.5339	1.1658	2.5	7.8	0.4774	6.2247	2.26	1.1113	-0.9678	1.0148	0.45	-1.2854	27.7
1985-07-01	3.125	0.446	9.325	3.4622	#N/A	3.3	0.9771	-0.2227	-0.416	-1.4	13.8	-0.5838	-6.2956	5.33	1.1446	1.2093	1.3798	0.354	1.1608	36.2
1985-10-01	3.217	1.99	18.101	4.8731	#N/A	12.9	4.8155	-1.058	0.3487	9.4	23.7	0.8749	7.603	2.69	1.198	3.9503	0.4469	0.67	0.2599	54
1986-01-01	5.154	-1.025	16.068	11.0902	#N/A	11.3	0.8317	-0.2592	0.2936	-0.5	20.9	-0.3378	-6.1936	9.71	0.005	3.7004	0.6277	-0.036	1.6603	39.3
1986-04-01	3.163	1.409	-3.863	2.0051	#N/A	5.1	3.5507	-0.999	-0.2023	6.8	20.2	0.4152	7.4548	10.48	-0.1276	5.6217	2.8175	1.169	0.1638	53.6
1986-07-01	2.526	1.163	23.255	3.8517	#N/A	12	0.7131	0.5708	1.011	1.8	67.8	0.1688	-6.0488	12.56	-0.5672	2.1247	2.3395	1.78	1.4309	67.7
1986-10-01	6.265	2.626	31.278	8.5807	#N/A	8.8	-0.1306	0.2145	0.5869	11.1	20.6	0.7369	12.2301	14.63	-0.9057	5.2534	1.5365	2.383	1.9946	63.2
1987-01-01	3.789	-0.642	33.528	7.7946	#N/A	14.1	3.0388	1.3174	2.636	12.9	28.6	0.1955	3.0569	26.52	-2.1608	7.7907	0.8726	1.705	2.8311	45.6
1987-04-01	4.9	2.411	21.513	2.6771	#N/A	9.6	4.4893	3.0182	2.187	16.4	43.1	0.18	5.3373	26.92	-2.0277	6.5235	3.6563	0.64	1.6901	59.1
1987-07-01	5.763	1.626	37.786	6.6952	#N/A	3.7	2.133	5.6907	2.3439	9.9	41.5	0.467	-3.744	9.98	-2.3746	3.0358	3.2128	0.008	1.5238	82.6
1987-10-01	3.491	-0.748	36.282	9.6819	#N/A	-3.9	0.9823	4.1263	0.4695	21.2	28	0.0559	8.3078	11.26	-2.7775	6.4219	0.6135	0.037	2.1068	64.5
1988-01-01	4.561	3.978	4.413	4.9335	#N/A	2	2.608	4.4656	1.69	4.2	23.3	0.2875	8.765	7.62	0.3633	3.9583	2.367	0.797	2.9127	29.4
1988-04-01	7.466	1.381	-3.226	7.7934	#N/A	1.1	4.1703	6.1891	4.6729	14.2	40.4	0.1329	16.3907	19.81	-0.0348	11.0939	3.2095	-0.442	2.5395	73.9
1988-07-01	7.578	1.185	16.86	6.4501	#N/A	11.6	2.6152	1.0247	1.1243	15	43.3	-2.3646	2.2586	27.88	0.3158	9.4647	-0.0937	-0.796	2.8426	54.6
1988-10-01	5.208	-1.699	-11.114	6.9197	#N/A	2.8	2.7498	4.9023	-0.5589	12	28.2	-3.2313	10.2157	13.96	-2.6496	2.9567	0.1252	0.582	4.8926	86
1989-01-01	6.2537	3.91	30.681	12.3934	#N/A	7.3	0.5916	4.453	3.747	40.7	65	0.9564	16.2023	5.44	-0.2782	14.9248	1.7636	-0.429	3.1886	67
1989-04-01	6.9018	3.332	16.308	2.6924	#N/A	23.6	1.823	7.5526	2.7803	21.3	32	0.1984	17.9073	26.54	0.3299	4.9128	1.8472	1.529	5.6738	11.6
1989-07-01	6.6752	0.324	11.931	8.9104	#N/A	13.8	1.5238	3.7817	2.61	10.9	42.5	-0.705	5.8466	34.02	0.6613	12.0318	0.7875	0.724	9.5316	80.6
1989-10-01	5.99	-2.167	14.853	12.6838	#N/A	26.8	1.5232	4.3019	-0.9209	26.3	35	0.0841	17.6314	40.93	-0.8507	4.2201	-0.1681	1.093	11.2877	71
1990-01-01	7.3172	6.756	27.143	5.4326	#N/A	9.3	4.3683	6.9549	9.7975	42.4	43.6	0.0803	15.5197	-3.54	0.6268	20.9774	2.9688	1.034	9.9792	-22.3
1990-04-01	2.8268	1.671	8.653	11.1849	#N/A	6.2	-0.4712	10.0096	3.3722	20.3	16.6	0.693	25.7382	10.73	1.7596	6.5658	0.1166	1.328	16.4113	44.9
1990-07-01	4.9319	-0.077	17.302	10.3722	#N/A	16.8	5.104	8.6324	1.9603	45.6	69.4	0.2615	12.8949	24.39	4.8996	9.0433	1.9377	0.637	7.9348	74.7
1990-10-01	4.5773	-3.628	25.43	7.1967	#N/A	24.7	3.5111	15.4331	-0.1939	21.2	49.6	0.758	28.9026	26	-0.2861	1.0988	-1.8555	0.498	12.8434	64.9
1991-01-01	4.7871	6.918	17.24	7.3786	#N/A	23.8	3.8112	17.7678	6.8546	12	19.4	0.5858	31.4945	-20.35	2.858	8.6015	1.8744	0.813	4.133	10.9
1991-04-01	-0.1081	0.377	23.314	3.8484	#N/A	10	2.8007	10.9234	2.1282	0.5	-12.1	0.4417	11.0486	-9.38	4.1062	-0.2005	-0.7528	0.154	5.4352	12.8
1991-07-01	4.5299	-0.682	-8.908	10.7114	#N/A	13.7	-2.4975	5.2156	-0.9281	11.6	19.4	0.2288	11.4776	15.07	3.4513	3.2163	-1.5423	-0.001	-3.5928	46.3
1991-10-01	5.765	-0.851	23.062	9.0232	#N/A	24.3	2.4239	12.7268	-0.6808	12.3	33.4	0.4689	17.7545	35.1	0.9438	6.8257	-2.4394	-0.518	3.2097	49.6
1992-01-01	1.5414	5.932	22.035	6.1262	#N/A	11.6	3.1135	18.7069	1.4725	27.1	-1.7	0.598	22.2535	-38.18	4.1572	4.7337	0.109582	0.579	2.174	31.1
1992-04-01	3.3684	4.298	27.053	11.8098	#N/A	8.4	2.1177	13.771	0.987	11.9	26.3	0.5821	28.1899	-58.23	1.3219	6.9496	0.109582	0.394	6.4374	54.9
1992-07-01	4.0361	6.006	44.449	5.3955	#N/A	62.7	-7.7508	10.3241	2.3005	32.5	68.5	0.6076	13.6245	7.37	2.4937	29.1371	0.109582	0.394	5.0389	42.7
1992-10-01	3.4329	-2.196	22.871	2.4743	#N/A	37.9	3.3265	8.5301	1.4608	31.5	42.5	0.6675	-1.8304	-3.88	3.8268	-14.1883	0.109582	0.383	-3.0723	50.1
1993-01-01	2.5489	4.69	34.794	13.897	#N/A	58.3	-0.4151	17.3517	2.8924	7.4	46.4	0.3828	3.2165	-32.38	3.5839	2.4552	-0.249891	0.378	1.2367	29.5
1993-04-01	4.0841	1.42	15.927	6.3012	#N/A	46.7	-2.3543	38.3244	1.8227	-11.5	67.5	0.0174	15.3645	-58.3	0.9902	-0.5815	-0.249891	1.012	6.9401	61.5
1993-07-01	5.2173	3.014	34.567	10.5168	#N/A	33.3	7.8837	12.9375	-0.3676	45.8	45.1	0.4419	1.7542	38.46	2.5207	17.4976	-0.249891	1.031	4.1751	96
1993-10-01	5.4265	3.066	16.254	8.4613	#N/A	50.6	4.5238	16.5661	-0.1361	7	95.8	0.6224	24.6892	13.54	3.3702	3.0413	-0.249891	1.033	-0.4273	91.8
1994-01-01	4.6289	3.983	15.024	13.9813	#N/A	13.8	-6.3278	-7.5873	2.4194	12	-13.8	0.421	25.2297	-9.62	4.0118	17.7982	0.5925	1.066	1.0936	90.9
1994-04-01	4.8298	3.769	-1.415	15.284	#N/A	4.5	-6.4471	-0.2989	1.227	-20.8	1.6	0.9315	-10.2604	13.94	5.2282	-14.5211	-0.3982	0.799	6.6277	56.7
1994-07-01	4.1394	1.471	6.925	5.4165	#N/A	25.3	-4.3313	-0.3287	2.4389	14.1	39.4	0.6604	-5.5457	29.78	6.3261	7.6943	0.9932	0.826	4.2392	85.6
1994-10-01	4.3212	3.447	0.348	8.1855	#N/A	53.3	4.6607	8.4952	0.9801	28.4	28.5	0.6049	16.9356	25.75	7.9157	-0.6914	-1.5312	0.854	6.6617	79.8
1995-01-01	6.6285	7.827	30.466	10.8047	#N/A	36.2	-3.2876	4.2633	1.263	39.3	65.7	1.6803	7.779	-3.89	9.5126	15.3723	3.8498	0.881	3.2705	99.8
1995-04-01	6.2267	5.484	-1.179	5.9867	#N/A	55	1.1335	7.376	-2.5146	8	10.3	1.6388	2.9542	43.26	9.5359	7.4135	0.2304	1.334	6.6989	123.1
1995-07-01	6.7576	1.743	10.307	5.3406	#N/A	40.2	1.6386	9.284	-0.5877	6.9	77.5	1.5761	2.8427	69.49	11.5156	13.6137	1.0851	1.322	8.2248	117.9
1995-10-01	8.943	6.916	10.171	6.2166	#N/A	33.8	5.553	15.181	1.4762	0.6	40.8	1.751	23.9435	48.27	7.9919	-8.682	-0.2774	1.305	11.9455	105.6
1996-01-01	4.6773	4.698	37.41	7.6098	#N/A	34.7	4.4997	7.613	1.9701	19.7	75.2	1.8018	15.4437	-7.8	11.1989	31.0456	5.2635	1.339	14.9819	84.2
1996-04-01	7.6452	1.727	2.538	8.4686	#N/A	35.2	3.0779	4.4484	0.5418	3.6	89	1.0608	26.4862	39.1	14.2321	16.8935	3.1594	0.722	-1.9196	103.4
1996-07-01	9.4888	5.438	19.467	5.345	#N/A	21	3.0305	8.0545	0.7797	17.1	68.8	1.7018	12.0992	3.3	8.296	15.7619	0.2568	0.733	6.3035	146.9
1996-10-01	8.382	3.197	0.228	18.4741	#N/A	66.3	5.472	10.6637	0.7133	-13.5	119.3	2.4076	40.4566	63.1	15.1408	-13.0573	6.2351	0.749	-1.8931	224.5
1997-01-01	9.9392	3.942	39.31	20.9935	#N/A	89.5	7.4861	6.4874	7.4655	9.1	159.8	2.5954	19.7414	7.7	8.2293	33.817	7.7759	0.739	4.8998	171.1
1997-04-01	0.9714	13.699	36.863	8.9059	#N/A	60.8	2.901	8.9645	1.5139	16	109.6	1.8589	28.9773	66.6	11.5752	4.1314	-1.0026	1.316	5.4072	144.7
1997-07-01	10.3374	3.899	16.904	7.2307	#N/A	28.1	10.4593	16.7015	2.58	40.1	53	3.1815	31.1436	13.4	4.6141	21.9925	4.3758	1.234	4.3647	176.7
1997-10-01	8.4563	-2.07	13.321	17.4876	#N/A	58	6.2765	9.6945	-2.1906	42.9	94.7	1.6191	10.9732	62.2	-3.0755	26.8598	1.7543	1.177	8.8503	228.7
1998-01-01	4.8328	11.021	44.275	16.1917	#N/A	104.7	10.0907	29.2794	0.8157	55.1	97.2	2.5548	50.6957	-96.1	0.0136	43.7235	5.0317	1.102	9.1043	77.7
1998-04-01	6.2469	5.956	35.112	3.9494	#N/A	90.9	-0.7205	17.8775	11.6099	20.6	88.1	0.6062	44.5424	-39.6	2.9476	39.8739	8.3744	0.232	21.0128	155
1998-07-01	5.6175	3.76	19.24	8.9642	#N/A	53.9	3.8059	27.1503	0.6121	36.7	64.9	1.2137	13.3214	16.9	-3.5011	27.1752	2.3945	-0.89	10.7333	84.2
1998-10-01	9.72	3.018	6.152	18.981	#N/A	107.1	-1.0904	2.9884	8.635	-16.5	5.4	1.696	15.5033	83.9	-0.4643	36.5605	1.8194	0.576	10.9239	136
1999-01-01	9.2702	16.486	65.957	-6.823	37.0795	96.6	14.294	35.1951	2.7211	104.1	176.8	4.6493	35.0785	-119	1.2911	28.1312	8.7575	-0.615	7.1318	114.5
1999-04-01	6.7252	12.752	44.325	2.5325	32.9059	90.3	12.341	29.4963	6.742	74.4	180.3	2.4738	34.4627	-87.8	2.4404	31.6588	3.7606	0.11	42.0252	255.3
1999-07-01	8.8842	16.865	59.592	12.8436	21.7505	81.3	6.1178	14.6768	7.3012	1.7	5.2	2.1033	28.2798	19.3	0.0046	53.1896	3.2995	0.304	9.9863	166.4
1999-10-01	15.4699	3.221	164.879	12.1416	37.9256	115.9	2.7858	28.9974	6.1522	53.6	-10.4	3.5944	45.8846	64.1	5.9714	30.8637	3.045	0.264	7.4498	229
2000-01-01	6.197	16.334	73.919	17.4934	70.9687	178.3	9.3718	26.1675	19.9126	39	396.7	5.8025	40.8706	-27.9	16.5423	55.0499	9.4388	-0.441	26.6033	258.3
2000-04-01	5.4361	14.103	46.701	27.2435	-30.9031	126.8	22.9031	28.8284	2.346	26.1	142.1	2.5763	29.6113	5.4	4.7835	41.5226	5.8011	-0.4091	13.6684	252.7
2000-07-01	9.805	12.622	51.056	8.7908	48.1719	79.3	12.4915	48.7389	13.4772	84.9	141.4	4.5395	19.7804	1.3	0.6428	41.2906	15.934	0.2171	8.1823	243.6
2000-10-01	12.8396	9.624	190.812	26.5652	42.0799	32.8	5.5839	49.8596	8.8854	72.6	121.1	3.0295	14.0456	69	0.8616	27.0103	6.1735	0.1926	14.7472	311.5
2001-01-01	9.2389	7.061	67.204	16.5287	33.467	156.4	14.3793	31.4964	8.5517	106.2	373.3	0.5291	55.5923	5.1	-2.4504	91.2747	3.9554	1.8532	19.3037	322.3
2001-04-01	6.7407	4.911	73.11	13.0765	-17.6211	73.9	-2.2636	22.3609	-1.3218	50.8	-4.2	1.0945	25.5028	-6.3	0.7171	9.3455	1.4968	0.1338	7.573	217
2001-07-01	6.1247	6.583	60.744	9.0214	-35.3452	47.5	4.8435	14.3912	4.9241	3.1	26.6	-0.3865	-9.6781	-23.9	-0.1204	36.0489	3.2511	1.6329	5.7672	27.9
2001-10-01	8.4368	6.079	76.324	21.0807	25.0424	-2.4	-4.4938	20.0175	6.5273	50.8	23.3	0.8963	-7.167	73.1	2.883	46.808	-1.1319	1.0174	-0.6623	221.3
2002-01-01	10.7723	8.631	59.1633	16.6944	29.5175	53.3	17.0267	37.1905	9.8159	41	27	0.1204	6.2264	-96.3	3.1256	38.6238	9.6973	2.032	9.4768	178.6
2002-04-01	13.8061	5.974	61.5295	8.7931	2.8458	83.9	-4.8699	38.073	2.147	28.9	55.9	1.4699	13.5461	45	1.6622	22.748	5.7392	0.4839	0.7013	252
2002-07-01	10.0577	3.371	-21.034	6.8633	-15.4572	87.2	8.0791	13.8886	4.3911	10.6	83.2	0.8426	5.0241	34	4.0136	31.8589	9.477	2.0924	-4.475	167.6
2002-10-01	9.7391	-4.675	129.664	10.5299	37.1342	0.8	-2.9621	38.3855	-2.5244	72.3	87.1	0.2983	30.4166	35.2	4.5078	33.5527	12.4955	-0.4329	12.5887	223.8
2003-01-01	3.0165	22.215	69.5912	20.4252	-1.5195	121.3	20.933	42.0123	3.5459	82.8	256.1	-0.3176	54.2375	4.9	2.3611	56.2185	10.4573	0.895	15.6056	251.7
2003-04-01	21.2257	11.242	77.5369	-5.1559	15.2785	65.1	11.4424	31.3265	7.6674	96	188	1.0254	58.8646	58.4	8.086	45.0449	9.2876	0.7429	9.4934	226.2
2003-07-01	13.648	6.768	46.7271	-1.5512	-5.0567	15.7	-10.7548	35.5953	-5.5124	25.3	125	1.5996	3.182	2.5	6.0238	12.1205	-1.6885	0.8432	-8.5226	141.5
2003-10-01	28.8488	0.448	138.107	19.768	21.5614	14.2	5.3635	40.1366	6.0504	84	94.7	1.957	10.1337	58.3	7.9041	37.5172	11.5022	1.5098	6.6153	292.4
2004-01-01	23.4526	28.723	120.401	0.8824	63.3489	108.7	2.8319	40.5299	6.3896	135.8	501.1	4.0904	38.0442	66.5	15.6398	91.8361	13.7042	4.4266	14.6753	478.6
2004-04-01	17.6187	17.128	69.9212	26.5423	-3.7981	-51.8	-7.2127	59.6678	15.2665	103.7	153.3	1.4057	14.5746	100	3.6739	56.7877	26.8583	-2.5642	7.9203	345.8
2004-07-01	13.0379	16.606	84.5627	8.4252	-37.3302	99.9	0.5881	21.5155	8.0884	17.6	273.5	1.5789	13.5897	31.7	5.1242	66.3686	10.5075	7.915	10.1034	293.3
2004-10-01	28.9446	-1.724	163.501	4.5006	15.0589	34.6	5.4217	74.3778	-0.6305	139.2	171.2	2.7955	37.9519	74.4	5.6087	82.0055	-11.3409	0.7654	11.9581	483.3
2005-01-01	18.2893	108.662	208.475	21.7201	6.338	188.4	31.36	71.4789	3.5606	126.1	536.4	4.5315	103.213	-41.6	8.2935	127.29	15.2675	4.5907	29.2249	235.9
2005-04-01	-24.4931	33.0295	151.744	12.3071	61.2841	85.9	11.6036	70.929	7.4596	143.1	359.3	1.3033	85.6347	104.5	7.7005	72.1229	16.7673	-2.3621	-1.9704	325.4
2005-07-01	24.1078	11.2977	173.869	30.5272	65.4487	79	10.7935	55.9054	1.6588	91	296.1	0.4305	32.9183	71.3	7.8807	152.751	18.9878	1.5082	11.5195	431.3
2005-10-01	32.6186	1.2502	217.194	1.4224	-44.3255	42.7	2.733	89.8006	13.4907	263.2	193.6	0.8174	65.9544	100.5	6.5508	54.4662	10.3033	2.2048	-1.088	284.3
2006-01-01	34.2998	47.5018	232.954	34.457	96.3837	176.4	10.9408	131.149	15.0035	197.7	645.5	10.9866	124.808	0.5	17.0124	229.861	32.0327	5.2796	51.7342	584.1
2006-04-01	35.9132	24.6049	92.0704	47.0224	20.8214	43.9	10.0514	52.5644	11.0602	77.1	170.4	1.193	64.9832	36.6	19.8048	230.785	32.8669	-1.7683	-10.5404	431.8
2006-07-01	41.15	5.4451	144.429	30.4735	24.3718	77.5	19.3245	62.1093	-3.3267	200	306.4	1.751	46.155	-0.2	9.721	160.109	32.0632	4.6973	15.8307	533
2006-10-01	32.6243	31.0344	252.273	15.4428	-27.3857	113.2	6.734	84.1916	13.2358	163.6	191.2	10.491	68.2324	70	14.5381	151.575	27.6486	5.5424	15.8452	571.5
2007-01-01	43.5294	41.0319	222.132	52.6985	234.973	186.5	30.9507	114.408	15.669	286.1	884.4	4.3309	79.3245	72.3	24.6509	258.141	41.9684	5.3229	79.4742	788.7
2007-04-01	47.1465	58.8637	210.601	44.9766	-5.0124	226.9	15.7347	114.466	1.6962	214.6	568.5	2.9808	119.072	44.6	26.4484	204.2	11.7203	4.4031	-0.0077	738.1
2007-07-01	30.4986	10.5826	194.067	19.8186	5.9396	187	19.1594	38.5195	3.3015	34	431.2	3.4989	7.2552	92.5	9.0599	252.396	35.8149	5.7396	27.4132	298.6
2007-10-01	16.5999	21.7668	376.668	34.3406	105.598	66.1	22.8508	71.551	26.7523	144.6	340.3	3.8619	51.6312	57.8	25.6042	201.377	29.5302	2.9561	37.8171	364.8
2008-01-01	44.3393	31.5126	174.299	50.6623	-22.5017	250.6	21.5986	68.2397	16.5159	261.4	535.5	3.1994	12.5544	101.8	12.5312	194.428	6.7185	6.0063	43.6558	473
2008-04-01	38.5041	42.7374	93.8443	28.2127	-147.52	40.5	29.6492	111.262	23.5466	100	-572.6	2.6047	113.79	-35.2	10.4503	112.596	19.5134	-1.6382	6.0616	0.8
2008-07-01	29.1788	-1.9249	135.269	21.2006	6.815	107	-4.3712	34.9827	5.6389	-6.6	-14.1	3.1505	-47.1764	36.9	0.3484	141.426	19.609	0.6343	38.9906	96
2008-10-01	9.2554	-19.2052	-208.735	15.8024	-70.9258	-227.4	3.6969	-12.3571	6.5858	-50.9	-714.9	1.4502	-95.9733	-115.5	-49.8327	-267.721	26.0474	-6.2862	-12.0283	-107.4
2009-01-01	12.1307	-9.0197	-37.3701	28.6399	23.7526	-57.8	13.573	-4.6943	17.7091	-50.3	-71.5	0.4024	111.18	-85.4	2.1547	155.132	-32.7388	-1.6477	12.7949	-109.4
2009-04-01	39.0792	-2.3473	67.1941	15.3769	36.0395	38.6	6.1086	19.6081	4.3206	94	-193.2	2.1855	28.2029	33.5	14.4145	-159.143	-27.1123	0.6443	9.4676	-12.3
2009-07-01	43.2727	2.6357	131.349	56.4155	-50.7839	-50.1	3.259	40.0109	-11.4106	125.9	-62.9	6.7017	-18.6124	-16.4	25.3079	39.0935	-7.9112	4.4124	12.4925	346.9
2009-10-01	63.1116	-16.3919	159.924	28.1826	-2.5118	-45.9	-6.2701	34.9933	42.4438	60.8	-40.1	2.8677	-55.5455	-57.7	13.9531	16.5456	-11.4257	4.0846	5.5952	100.2
2010-01-01	25.4631	20.5901	143.322	48.1292	5.1437	97.2	31.1488	3.7864	-6.0029	166.2	197.3	4.4277	42.8342	13.3	15.7512	85.7085	14.1369	-1.0159	19.9618	320.7
2010-04-01	25.55	9.2103	153.664	26.0759	35.2773	130.6	1.4442	-12.5804	45.0336	-37.1	79.3	3.3131	4.3066	107.5	11.9203	80.1526	32.9222	2.7704	10.0114	187.6
2010-07-01	24.7663	-8.5919	87.2722	24.4322	-14.5148	102.5	17.123	-0.3976	-23.7474	101.4	327.5	3.9503	33.6975	159.8	12.7034	146.618	-13.0341	2.0513	2.5552	560.7
2010-10-01	48.41	-50.9365	203.706	56.176	30.3563	99.6	-24.0336	19.1122	60.0493	67.7	-134.3	8.3732	44.6857	-29.3	3.7054	-99.3073	29.1818	1.6305	-3.0323	322
2011-01-01	36.9766	42.6156	206.65	47.9573	-0.5207	0.8	0.8874	28.5007	32.3084	94.4	192.9	5.2792	53.3132	126.8	22.9299	234.458	37.2278	2.7118	27.0027	597.9
2011-04-01	58.7587	0.8606	202.367	40.9181	0.6785	61.5	-9.1111	22.3314	7.9174	147.6	64.7	5.2	36.6126	-2.8	14.6518	108.908	-20.6223	2.7028	8.8132	130.4
2011-07-01	58.1966	4.9177	237.57	22.9812	72.6204	241.7	5.2516	19.5164	67.749	-30.7	47.8	-2.34	51.7106	139.2	1.4431	85.5717	36.608	4.8841	28.5386	252.4
2011-10-01	11.6705	5.6083	158.419	50.4288	-1.3093	-100	-2.6089	19.6332	21.2343	-236.9	-143.6	-2.3515	8.0903	43.8	6.4279	39.0385	-35.9886	-6.8677	-11.036	2.8
2012-01-01	46.6337	10.7134	258.447	26.2851	35.9779	310.8	15.2055	35.2493	39.8351	59.3	130.8	-0.2615	2.4617	74.1	15.5842	129.272	41.6244	1.1864	36.6953	189.1
2012-04-01	15.5581	-2.937	203.741	26.6384	69.6286	107	10.0647	41.2862	33.5358	-6	-203.5	-1.4015	25.7335	62.1	9.1792	17.8104	-8.7402	2.9337	8.7264	-122.2
2012-07-01	37.0019	-3.8345	192.414	79.8295	65.2978	-20.9	-6.9872	-57.2924	5.4514	-63.4	-35	1.2909	-18.5449	77.6	4.8692	80.4219	12.9797	0.1091	39.2658	298.4
2012-10-01	56.5075	-8.387	259.99	61.178	-31.0302	-105.8	-25.0083	5.6186	-26.6252	13.2	-115.5	2.7557	-14.007	82.2	-5.5274	-45.1392	0.583	2.5769	-39.3233	266.8
2013-01-01	25.0569	2.3138	191.598	24.0621	25.3252	-12.6	8.2021	17.855	-22.6533	102.9	22.3	4.3399	6.6613	31.6	10.3174	77.5539	-10.7502	2.6703	35.4603	256.2
2013-04-01	21.976	1.958	330.598	20.7038	-23.4727	0.7	-15.3972	-37.2812	-8.9807	57.5	59.1	5.7012	4.9741	52.8	-2.0164	95.4097	26.2122	-3.3	-7.0373	249.8
2013-07-01	41.5914	-2.0526	178.241	34.1623	7.9612	-84.4	3.1352	-44.0264	-7.0459	13.8	-301.5	0.485	4.9974	96.3	8.6197	92.8924	13.6618	-1.4348	39.5823	173.6
2013-10-01	62.1733	-12.3413	247.564	57.0434	3.942	-123.5	12.074	-14.949	13.3858	-112.7	-30.8	2.2064	-13.3268	171.6	5.9675	39.8195	21.8265	3.0788	-0.2467	372.6
2014-01-01	27.5082	1.938	263.407	43.2618	-15.3464	52	-11.525	48.7151	20.825	200.6	211.3	5.098	8.0151	24.7	9.9008	91.6845	10.8793	1.7107	55.4272	305.7
2014-04-01	50.0002	11.6582	164.897	45.8173	2.3805	82.6	-6.3349	49.7082	11.5933	127.2	26.8	1.8186	46.5383	121	16.8067	42.9036	-2.6168	5.0022	4.6135	300.3
2014-07-01	25.3892	-20.1922	192.555	31.4766	-1.5925	35.8	5.1783	19.3996	5.1868	-17.9	104.2	2.8878	38.1019	113.4	3.1807	42.4775	6.2239	1.8287	-13.1291	374
2014-10-01	39.5716	-10.2484	122.475	56.9998	38.4386	-71.4	7.1494	-0.1012	-11.13	-58.9	-10.1	-1.0288	12.1644	87	-0.342	5.3041	40.5441	3.1552	-35.326	129.6
2015-01-01	50.9958	3.9144	614.972	50.1566	78.2125	240	36.9565	73.7049	31.7877	231.4	-59	2.2523	88.9495	107.4	2.465	86.1477	22.7192	3.0147	31.6438	430.1
2015-04-01	41.2841	-8.21	95.7848	56.7107	19.1987	-85.5	-34.2622	39.2647	3.1567	-38.7	-192.6	0.4708	18.2658	-17.1	12.7043	45.8798	6.317	2.2315	-10.4582	185.4
2015-07-01	38.1853	-6.4531	359.185	49.1375	14.1504	24.6	-7.1577	33.2006	-7.4803	-13.9	23.2	-0.9202	2.5812	91.7	-10.158	219.917	30.138	-0.8728	13.1447	-35.7
2015-10-01	39.0947	-14.3152	154.143	60.6848	76.345	-127	-15.8755	-4.5902	-30.7618	-111.5	-2.1	6.7526	-17.0599	61.9	-17.655	26.6556	-18.9415	-0.5679	-39.9682	-76.2
2016-01-01	6.9201	-17.3818	203.522	20.6915	9.1568	125.4	25.8945	28.9087	61.4904	178.6	-16.2	4.311	57.5045	85	-9.687	147.185	20.5244	4.9953	43.3928	134.9
2016-04-01	24.7548	-0.9282	159.653	73.098	79.0214	99.8	3.5647	44.3236	-9.5263	108.5	249.4	1.1353	3.3685	96.9	11.2158	90.043	8.0891	1.9799	10.8367	363.5
2016-07-01	11.3066	-12.5632	102.814	45.0338	65.0186	-6	4.0745	17.3133	3.7575	67.3	83.7	6.6952	-9.1531	59.6	9.2696	131.803	-9.9809	3.0646	6.3616	256.4
2016-10-01	27.5564	-21.1992	-15.8449	55.7587	38.2558	-54.4	-4.7953	4.1885	-46.5489	-42.9	-52.6	5.6569	-4.5758	88.4	-3.1765	-29.6765	-26.178	2.2341	-25.9501	-48
2017-01-01	13.592	15.809	154.952	57.3098	22.6474	185.3	22.4764	67.1047	52.7171	239.3	174.7	3.3608	75.8775	-14.9	21.0305	175.614	17.4945	-0.7281	73.3524	412.2
2017-04-01	33.967	3.0474	457.73	29.4325	57.0428	-17.8	-10.1598	30.1411	-22.1231	46.7	93.4	5.6813	9.497	51.3	9.304	36.5897	-13.2802	1.8151	-17.9807	450.5
2017-07-01	24.4752	-7.7936	-101.451	34.7884	-29.7583	6.3	2.6819	18.7373	20.2726	25.7	191.3	2.3054	3.3312	141.6	1.751	4.0207	4.2674	0.958	16.1229	507.9
2017-10-01	46.8977	-1.5011	8.9042	95.41	51.4277	-46.8	15.2328	38.5147	-13.2067	-21.6	186.8	4.4303	20.9846	-7.9	4.6697	-55.9906	5.8161	0.8165	-10.7807	175.7
2018-01-01	42.5816	17.5568	84.9139	4.3518	-17.7587	127.4	-5.9439	62.4269	25.7717	273.3	181.4	5.8478	59.7569	113.5	15.3688	70.3184	1.4494	2.0434	26.734	446
2018-04-01	40.8838	-1.0401	14.0349	41.2055	-73.6563	76.9	-8.0218	39.019	1.4715	156.2	-73.4	1.962	26.2867	78.8	19.0821	30.8953	2.1759	2.2553	12.0602	-132.3
2018-07-01	2.7523	-1.9257	-61.8978	48.0873	-67.8477	27.9	0.632	34.0299	22.3696	15.5	-60.8	6.5511	22.1823	134.3	10.1529	-122.94	5.368	-0.6683	0.7377	117.8
2018-10-01	16.5273	-40.7805	-440.801	70.5909	-45.4544	-44.5	-18.678	6.1202	-12.0419	-92.4	214.9	4.6653	-14.1889	12.4	-3.9725	-365.133	9.8118	1.8782	-19.299	326.8
2019-01-01	7.8123	19.1764	170.637	30.12	-21.71	114	-13.8915	45.3411	63.0104	351.9	43.2	4.2148	20.5882	133.7	10.3165	54.9349	19.8697	1.2062	18.5096	157.6
2019-04-01	19.144	13.7013	-81.2717	71.6985	2.8098	66.3	13.2663	32.403	-2.9643	215.1	-27.5	3.9343	5.7747	13	23.9927	-47.5663	8.7176	-0.5105	-10.7603	319
2019-07-01	24.2006	10.0665	38.4364	45.4484	4.6588	-10.7	10.484	6.9796	15.5849	141.6	89.5	4.1058	45.2905	69.4	4.3578	208.622	-6.5148	3.4962	14.9444	241.8
2019-10-01	26.337	-34.3357	-258.363	90.86	43.0339	-157.5	-12.0475	28.8557	-44.9419	-303	-193.5	10.7842	6.5319	15.9	-1.8737	-171.703	27.8603	0.0856	-27.2295	79.4
2020-01-01	30.8381	9.5611	-18.2312	-13.5427	39.3032	259.1	25.1288	72.3731	53.6267	492	702.5	7.1405	31.6133	422.4	16.2865	54.9456	16.1261	4.5091	43.7071	953.9
2020-04-01	-47.6874	13.2841	88.4315	23.9341	-88.2414	98.1	31.7389	52.9934	-9.7464	-142.5	-300.9	14.5186	18.6205	-125	9.4998	-9.4458	-11.7244	-2.2826	-18.2103	-62.7
2020-07-01	26.6509	-12.1719	19.8307	20.7329	29.4494	190.5	5.8465	8.166	-0.4244	89	63.7	10.5946	0.5658	31.1	2.0797	-17.1537	-5.5015	-2.9588	12.8479	174.1

## Sheet: OUTFLOWS
	AU	AT	BL	CA	CH	DE	DK	ES	FI	FR	GB	IL	IT	JP	KR	NL	NO	NZ	SE	US
1980-01-01	0.348	1.895	19.284	5.4995	#N/A	10.1	0.0313	0.5381	0.2238	2.4	31.5	0.553	-4.0628	6.79	0.0156	4.6004	1.1275	0.048	0.0711	12.7
1980-04-01	0.254	-0.119	7.778	3.4351	#N/A	6.2	0.0491	0.233	0.143	8.2	18.2	0.575	1.0006	0.78	0.0934	2.6809	0.3879	0.067	0.2143	24.4
1980-07-01	0.18	1.683	9.093	3.8655	#N/A	0.2	0.0579	0.0347	0.4384	5	11.7	-0.311	-1.4144	11.84	-0.0448	2.8044	0.4612	0.045	0.2649	20.1
1980-10-01	0.079	1.859	9.921	5.4094	#N/A	11.6	0.0691	0.2845	0.9321	21	38.7	1.047	14.1348	6.87	0.1382	5.3051	0.1419	0.06	0.293	22.7
1981-01-01	-0.141	1.269	14.442	2.1446	#N/A	6.5	0.1889	0.1784	0.0883	-0.3	34.1	-0.3828	-1.8106	13.86	-0.0831	5.3367	0.768	0.049	0.213	21.8
1981-04-01	0.362	2.28	4.925	6.5347	#N/A	2.8	0.486	0.2228	0.4187	4.3	20.7	0.4801	5.1593	0.85	0.0211	3.0536	-0.1713	0.079	0.3629	21.7
1981-07-01	0.614	0.765	1.718	4.6662	#N/A	3.6	0.3628	0.2624	0.709	5	27.6	-0.5354	-0.4204	17.77	0.0526	2.8135	1.29	-0.044	0.3131	19.7
1981-10-01	-0.507	-0.492	-1.794	4.4662	#N/A	10.8	0.3319	0.4068	0.7116	15	25.2	1.0533	15.4316	6.72	0.1568	1.6409	0.0058	0.055	1.0523	45.9
1982-01-01	0.523	1.212	6.846	2.2477	#N/A	3.6	0.7125	0.6975	0.0767	-2.1	21.4	-0.5276	-5.0696	15.09	0.0346	5.0569	1.2567	-0.002	0.3521	35.5
1982-04-01	0.18	0.882	3.601	3.6235	#N/A	2.3	0.0603	0.7687	0.6264	1.8	1.3	1.0488	-0.0682	-3.6	0.1512	0.7559	-0.6723	0.136	0.9901	45.7
1982-07-01	0.486	0.237	8.519	-0.6267	#N/A	1.8	0.6209	0.7123	0.6268	3.6	31.3	-0.9046	-1.0562	15.32	0.2421	-0.2103	1.0611	0.027	0.6693	24.3
1982-10-01	0.274	1.795	10.72	1.8045	#N/A	3.9	-0.115	0.5641	0.9889	10.8	3.8	1.1118	8.9213	2.11	0.2483	0.8771	0.5988	-0.016	0.979	22.1
1983-01-01	0.544	-0.291	0.935	2.9204	#N/A	-1	-0.2004	0.2471	0.2162	-5.6	17.6	-0.9081	-7.836	14.76	-0.0835	0.8088	0.0982	0.091	1.1856	27.5
1983-04-01	0.158	2.583	2.626	4.262	#N/A	8.4	0.6358	0.0547	0.4252	0.3	0.1	1.3303	5.0606	2.69	0.0695	2.263	0.3681	-0.032	1.0217	3.8
1983-07-01	0.213	1.457	16.971	0.2889	#N/A	1.4	0.2876	0.048	0.0324	2.7	17.4	-1.1116	0.8426	18.68	-0.0276	2.5827	0.4078	0.011	0.4795	10.7
1983-10-01	0.243	1.713	-11.605	1.6677	#N/A	6.9	1.2147	0.2873	0.8279	11.9	11.7	1.5186	13.6957	7.91	0.1826	-0.0004	0.8408	0.104	0.7341	19.8
1984-01-01	1.484	0.369	11.689	5.7455	#N/A	4.5	-0.3903	0.2123	-0.5106	-3.2	20.4	-1.2668	-5.5588	17.55	0.0549	4.1984	0.232	0.095	0.8164	10.7
1984-04-01	0.436	0.96	13.345	5.3855	#N/A	4	0.9187	0.2354	0.9526	3.8	13.6	0.6852	2.3898	8.02	-0.0438	2.0923	-0.4319	0.045	0.6291	25.5
1984-07-01	0.726	2.722	5.582	-1.2861	#N/A	7.4	1.2167	0.4801	0.3525	4.2	1.2	-0.5345	0.3995	21.72	-0.0245	1.198	1.2602	0.123	0.2569	-14.2
1984-10-01	0.938	1.456	5.15	0.761	#N/A	13.3	0.9559	0.1114	1.4156	11.2	10	0.7375	14.4829	18.63	0.1062	2.9086	0.3411	0.132	0.731	11.7
1985-01-01	1.688	2.323	25.218	4.5329	#N/A	6	-0.2652	0.4114	0.4511	0.7	18.5	-0.8061	-0.058	10.21	0.4423	6.2833	0.7597	0.352	1.1636	2.5
1985-04-01	0.258	-0.277	4.935	-2.497	#N/A	7.8	0.8648	-0.1356	0.4403	1.9	7.4	-0.1181	2.081	16.59	0.1021	-0.313	-0.139	-0.05	-0.0576	0.1
1985-07-01	0.971	0.165	10.385	1.2237	#N/A	4	0.5021	0.7904	-0.3021	-1.1	20.8	-0.5797	-4.9535	18.63	0.2316	2.3424	0.4803	-0.133	0.2704	2.9
1985-10-01	1.654	1.144	17.698	1.068	#N/A	21.7	3.3662	0.8341	0.1266	10.1	16.2	1.0318	11.4846	21.73	-0.1009	2.3331	0.8275	0.109	0.6957	19.1
1986-01-01	1.062	-0.446	16.745	8.0078	#N/A	17	0.7409	0.1763	0.3755	-1.8	21.5	-0.2852	-10.4107	23.17	0.2877	5.2791	0.7928	0.234	1.4917	16.6
1986-04-01	1.104	0.741	-3.139	-0.3119	#N/A	18.2	3.2685	0.8891	1.2326	1.7	22.1	0.6717	4.4957	30.62	0.2367	7.4654	0.0157	-0.015	0.8903	26.4
1986-07-01	1.739	0.906	24.916	0.4079	#N/A	16.7	-1.5932	-0.0503	1.5513	4	61.6	-0.2076	-1.372	32.43	0.3875	1.9372	0.9321	0.185	0.7749	30.9
1986-10-01	1.762	1.302	31.462	4.2454	#N/A	21.2	-0.898	0.1529	0.6084	17.5	25.7	0.7444	12.7768	34.05	0.6438	4.0505	2.5696	0.234	1.8343	33.6
1987-01-01	1.902	0.333	33.538	0.6067	#N/A	14.7	1.3044	-0.6211	-0.4042	9.9	20	-0.2761	-3.4107	35.58	0.228	8.9532	1.5379	0.678	1.6521	-1.7
1987-04-01	0.736	1.728	20.184	1.1162	#N/A	19.8	1.4262	-1.026	0.8868	18.6	31.4	-0.4431	7.3716	38.33	0.0944	6.5927	1.0648	0.593	1.9314	33.5
1987-07-01	2.303	1.843	37.912	1.5895	#N/A	9.9	1.6133	0.0706	0.8122	10.5	42.5	-0.0688	-0.3339	26.68	0.3197	2.2614	0.1067	-0.565	1.897	28.1
1987-10-01	3.817	-2.292	37.823	3.8454	#N/A	1.5	-0.3485	1.4995	-0.7938	20.7	10.4	0.0075	0.4934	15.45	0.4464	7.2531	0.3642	-0.187	1.901	33.4
1988-01-01	1.917	3.72	5.046	-2.6914	#N/A	16.4	1.4472	-0.6216	1.8214	6.2	10.5	0.4166	3.9708	28.51	0.1642	7.3254	0.1664	0.643	1.9706	-2
1988-04-01	1.904	1.47	-2.181	1.7961	#N/A	22	1.8681	1.0112	1.8395	15.1	34.6	-0.0752	14.5447	32.07	0.6931	8.2015	0.2499	-0.396	2.1037	25.9
1988-07-01	3.294	1.72	17.136	0.6591	#N/A	26.7	2.4479	1.2246	1.8281	15	38.1	0.2297	-0.9806	38.33	1.0231	11.2068	0.3306	0.029	2.1211	45.7
1988-10-01	2.387	-2.481	-10.275	3.5065	#N/A	22.4	2.985	0.3526	-0.6614	10.6	16.1	0.4108	3.4123	34.72	1.0344	1.3847	-0.0365	-0.53	4.0953	32.3
1989-01-01	1.9855	5.199	31.239	6.1607	#N/A	24.9	2.8363	-0.3756	2.9387	38.7	45.6	-0.526	3.7937	23.14	-0.0149	17.7837	0.7525	0.57	3.7425	52.9
1989-04-01	3.0123	3.268	18.022	-4.081	#N/A	35.6	1.6413	0.8625	1.5872	17.8	31	0.4386	12.2049	42.73	-0.0516	6.501	1.5796	0.546	4.3653	-0.5
1989-07-01	0.9966	0.662	10.923	5.0281	#N/A	23.1	1.9798	-0.1161	2.0732	9.8	37.3	0.4769	-3.0752	42.29	0.5194	13.8128	0.3213	0.536	6.077	54.9
1989-10-01	1.3255	-5.098	16.252	5.266	#N/A	46.9	1.3771	1.3769	-1.8538	22.5	37.9	0.6087	19.8196	52.08	1.8051	6.1732	-0.4569	0.539	5.66	50.3
1990-01-01	3.388	7.79	26.808	-0.8843	#N/A	31.3	2.6852	3.9114	3.0404	32.6	30.6	0.7718	1.6292	17.94	0.846	26.4399	2.6369	0.542	8.9532	-38.3
1990-04-01	-1.6258	1.147	9.217	2.383	#N/A	20	-0.5931	4.0267	1.912	13.8	15.2	0.3677	5.7671	22.84	0.9608	4.8812	-0.1958	0.401	9.4886	42.6
1990-07-01	1.0954	0.213	17.487	4.4563	#N/A	27.6	5.0215	2.8599	-0.3894	33.6	60.6	0.2777	10.7078	26.79	4.3131	7.1094	2.8327	0.421	7.8547	58
1990-10-01	-0.1721	-4.408	26.666	4.8772	#N/A	33.5	0.9787	7.2561	-2.0321	24.8	46.4	-0.2173	22.294	20.72	-1.5417	4.111	-1.3389	0.421	1.5945	39.4
1991-01-01	2.1258	8.164	15.939	-1.0579	#N/A	26.5	5.2366	9.5376	6.8079	11.5	18.1	-1.0528	14.7854	-5.35	0.5056	15.95	1.8086	0.416	6.3933	15
1991-04-01	-3.2381	0.59	24.755	3.1806	#N/A	5.7	2.6241	-1.2215	0.6804	2.5	7.2	0.8699	6.0219	6.45	1.72	-4.9497	1.9241	0.187	-1.0299	2.3
1991-07-01	1.6161	-1.363	-7.076	4.4866	#N/A	5.8	-1.1986	1.0042	-0.0146	7	16.2	0.4042	8.0336	31.8	1.8819	4.8391	1.3223	0.185	1.3186	34.6
1991-10-01	3.6998	-1.619	24.245	3.4214	#N/A	27.4	2.5798	5.2205	-4.2955	18.2	3.5	0.8625	18.584	53.88	1.1394	8.3989	-0.4234	0.176	3.8393	29.8
1992-01-01	1.6657	6.422	22.863	0.2382	#N/A	6.9	4.4884	9.4883	0.087	26.4	13.5	0.0042	16.2491	-4.32	1.6827	5.4887	0.370665	0.115	-2.3535	12.7
1992-04-01	1.1109	3.412	29.118	7.7482	#N/A	5.8	2.9247	2.4532	-0.6289	14.6	17	1.0326	23.3349	-32.97	1.7638	8.6805	0.370665	-0.406	3.3129	24.1
1992-07-01	2.1237	5.194	45.544	5.9863	#N/A	3.4	-6.3893	20.4708	1.8054	40.1	79.2	0.6071	20.8832	26.18	2.1667	27.7331	0.370665	-0.408	3.4171	24.1
1992-10-01	1.8814	-3.359	26.689	-2.0568	#N/A	54.4	-0.6403	13.0495	1.8869	30.9	26.2	1.2622	-9.5346	15.89	0.7462	-7.909	0.370665	-0.396	-4.0129	28
1993-01-01	1.4864	5.394	38.281	2.3793	#N/A	62.1	-1.0146	17.3272	3.1619	5.1	52.7	0.1134	-3.719	5.06	2.2358	11.5012	-1.89195	-0.391	1.3359	26.7
1993-04-01	1.3296	0.637	17.597	-1.082	#N/A	42.1	2.729	36.2308	-0.7776	-12	55.5	-0.5592	16.6319	-38.52	0.9611	1.1622	-1.89195	0.811	-3.3831	50.2
1993-07-01	1.7197	3.292	38.88	8.4524	#N/A	11.8	8.4727	13.2947	2.1448	56.5	31.3	0.5375	1.0238	52.29	2.16	9.0901	-1.89195	0.826	3.2277	64
1993-10-01	3.0421	-1.122	20.349	0.9433	#N/A	58.9	5.9961	15.9695	-0.6917	15.5	92.9	0.3321	25.895	43.68	2.4853	11.7052	-1.89195	0.828	-0.7745	57.2
1994-01-01	2.9341	4.759	16.053	9.3912	#N/A	-3.3	-6.1287	-8.9429	-0.2259	0.1	-11.5	1.426	27.4181	25.44	1.9045	13.6908	0.3335	0.854	3.7696	44
1994-04-01	0.5593	2.11	0.452	9.7031	#N/A	-6.6	-4.8846	-0.3337	-0.1511	-16.8	-4.8	1.5042	-5.2003	30.41	3.5022	-8.2257	0.1239	0.314	1.797	50.5
1994-07-01	-1.7438	0.05	9.539	3.9035	#N/A	16.1	-2.1425	-1.3226	1.8529	22	38.5	1.1799	-1.036	43.5	3.3846	12.3599	1.1889	0.324	2.3207	37.2
1994-10-01	0.41	1.357	5.021	6.803	#N/A	56.3	6.3572	6.5463	1.553	18	32.6	-0.5337	19.8804	45.84	3.6346	2.0564	-0.6268	0.335	4.6571	62.3
1995-01-01	1.168	6.556	33.406	7.9545	#N/A	21.8	-2.2891	10.7237	2.0518	42.3	74.9	-1.2906	9.6959	23.03	5.6299	18.8675	1.7419	0.345	3.5433	65.2
1995-04-01	2.1265	0.127	4.274	6.5994	#N/A	51.6	2.9188	6.5824	-1.1317	14.5	8.8	0.1112	-2.1203	59.38	4.4615	19.8162	1.8012	-0.05	6.3146	117.8
1995-07-01	2.4823	2.983	13.621	4.6608	#N/A	21.5	0.8235	10.5352	1.5018	4.8	75.7	0.3945	9.1145	60.71	5.2241	8.8886	1.5947	-0.051	7.2949	48
1995-10-01	4.6223	4.249	13.219	4.8023	#N/A	24.6	4.0158	14.3807	2.138	1.8	33.8	2.0621	24.0963	67.68	4.5573	-2.7599	0.2916	-0.05	17.2078	122.8
1996-01-01	2.6284	4.503	40.38	3.4754	#N/A	25.4	2.7914	0.1534	5.0472	22.4	85.2	-1.0192	12.7936	-19.1	5.1067	35.1298	4.815	-0.051	15.658	83.6
1996-04-01	3.7237	1.077	5.079	12.7362	#N/A	25.9	4.5802	-4.1613	3.0678	7.4	86.1	0.2518	24.4016	46.4	4.1642	15.9696	1.8401	-0.054	5.6994	71.7
1996-07-01	3.1094	3.104	21.254	8.2213	#N/A	7.9	4.2335	7.8074	1.2658	24.7	65	-0.9216	19.6258	10.4	5.7907	20.3804	1.4247	-0.054	7.0209	103.1
1996-10-01	4.7564	0.837	4.699	16.5818	#N/A	72.5	2.593	4.6198	2.7057	-3.6	113.4	1.2736	45.8693	82.3	9.0325	-16.1113	8.3551	-0.056	0.6973	172.7
1997-01-01	6.5376	4.897	40.657	21.0542	#N/A	73.8	4.9529	5.5774	3.362	21.3	168.3	-2.019	13.0084	33.3	2.8217	41.3691	6.8916	-0.054	9.9732	159.1
1997-04-01	-2.0265	11.236	39.903	10.7419	#N/A	53.4	2.0157	7.1766	3.9218	30	107.9	-1.6928	43.1886	85.9	4.4768	5.6871	-1.2671	0.21	7.6033	99.3
1997-07-01	4.4444	2.928	20.388	1.5508	#N/A	35.9	8.9276	13.9251	4.3408	40	49.7	1.3706	27.2435	42.6	3.4527	26.1451	3.5076	0.198	9.3829	129.5
1997-10-01	4.3393	-1.784	17.654	12.9305	#N/A	60	2.7311	5.9902	0.7626	58.6	111.5	1.6754	14.7329	101.5	4.6396	27.4568	10.5207	0.188	8.6474	113.1
1998-01-01	2.7476	9.924	47.133	4.1404	#N/A	97.8	9.2786	32.399	2.4008	65.5	98.4	0.7696	43.8501	-70.3	0.3252	55.0388	4.3541	0.177	7.9818	76.5
1998-04-01	-0.0842	2.317	38.396	7.8561	#N/A	84.1	1.3764	17.3192	10.2998	21.8	82.4	0.8391	54.0404	14.6	0.2401	42.4847	7.0522	0.169	17.0408	138.7
1998-07-01	1.9845	3.04	22.164	9.5881	#N/A	39.9	8.3766	26.6121	2.2833	48.6	64.4	0.6472	22.7253	29.2	-1.0665	30.5054	2.6641	-0.047	9.8597	66.4
1998-10-01	4.8612	-0.777	13.919	15.9248	#N/A	106.1	-5.4567	11.2646	7.775	-11	-11.3	0.7101	21.8753	103.6	1.8373	34.6782	3.4014	0.475	14.063	97.8
1999-01-01	5.3808	18.163	70.505	-11.7122	39.2903	143.3	11.0799	42.9679	5.4724	127.7	162	1.057	40.3939	-98.1	0.6655	34.9853	6.418	0.876	12.1364	99.8
1999-04-01	0.6957	10.641	49.13	3.0125	41.6443	77.2	9.1603	36.0375	7.6012	78	190.3	1.8506	35.3854	-90.2	1.9674	35.5334	5.2137	0.34	39.7696	190.4
1999-07-01	3.2971	13.325	61.786	17.1649	33.7454	77	6.0149	14.0739	6.9635	10	-18.7	0.0804	30.1044	20.3	2.7307	59.3342	3.3132	0.312	14.5582	137.1
1999-10-01	4.4304	2.017	168.827	12.3468	47.9764	105.4	2.1905	26.9567	8.8727	62	-11.2	2.8306	40.6302	80.4	-0.7817	28.03	5.8962	0.204	5.0467	108
2000-01-01	6.593	17.37	77.511	14.2768	91.4817	160.1	11.739	19.5514	23.1166	43.7	387.8	3.9538	35.6771	-7.8	5.5399	70.0016	10.0865	0.491	31.9472	226.6
2000-04-01	0.515	12.575	49.958	35.4578	-20.2898	92	24.8694	27.0935	3.171	33.3	139	2.844	27.9604	36.1	-0.0257	44.4371	9.0872	-0.9615	13.8943	115.4
2000-07-01	6.4128	11.469	51.066	12.7167	51.2465	90.3	12.6629	46.9674	16.1893	111.3	141.9	2.2366	19.0498	18.5	-0.0745	32.0527	15.8339	-0.7979	10.4432	83.7
2000-10-01	6.6383	7.699	190.785	27.9899	58.3779	28.3	4.7167	47.1531	10.3562	79.9	93.1	1.2474	19.1964	85.7	2.9659	21.9976	16.6843	-0.6287	10.2019	161.6
2001-01-01	8.8656	10.199	69.903	16.7625	41.5524	152.6	18.5739	24.6305	11.2983	98.1	371.6	2.1125	58.8015	22.8	0.3504	98.0888	9.5806	2.456	18.9956	212.7
2001-04-01	2.9136	4.665	72.629	19.329	0.7667	65.5	-0.472	19.437	2.909	65.1	-10.7	1.1923	20.8026	19.6	2.5632	7.6258	10.6091	-0.1172	6.5184	96.9
2001-07-01	5.2362	3.492	61.524	9.6465	-29.3027	44.6	5.1411	8.4932	6.6716	24.7	23.4	-0.7625	-4.941	-25.9	-2.1265	30.6102	9.8024	1.0732	7.2799	-33.1
2001-10-01	5.8021	4.456	77.158	22.6914	35.8194	25.1	-4.3715	17.5799	8.785	46.7	28.9	1.9115	-1.1862	79.3	0.8322	45.1685	5.1625	0.1533	-0.2839	105
2002-01-01	10.1578	13.057	63.4683	15.4759	32.0574	47.9	15.1525	30.5196	10.8645	42.7	14.9	0.5683	6.343	-65.5	-0.2136	44.2304	12.4427	1.8689	12.54	93.3
2002-04-01	7.8222	5.079	64.7389	7.1552	20.6496	77	-4.6469	32.1366	4.092	34.5	42.9	1.0901	11.1737	39.1	0.7767	14.9399	11.1636	0.5006	4.1078	159.9
2002-07-01	5.337	1.964	-24.5812	13.2271	-13.7884	88.7	4.5205	9.7126	5.6665	18.9	91.7	1.2076	5.9025	50.2	1.9917	24.9234	8.6674	1.1837	-3.1964	6.4
2002-10-01	4.3206	-3.267	130.474	16.5124	49.3278	22.2	-1.1813	31.9007	0.2027	72.4	71.5	2.2395	22.6426	56.6	4.8767	40.3882	10.8428	-1.9541	11.6035	55.8
2003-01-01	-0.371	23.573	72.6184	20.8517	16.1157	132	23.3004	34.5604	6.8732	77.8	261.7	1.1205	37.7583	17.2	1.5696	62.4674	15.7002	0.345	19.7839	96.1
2003-04-01	8.2001	13.749	88.6246	-0.5681	24.8315	92.2	8.6393	29.6478	12.5947	83.9	156.7	1.8909	40.919	29	6.0799	47.6129	16.6835	-0.3841	14.2976	164.5
2003-07-01	6.213	5.434	46.5213	4.1668	-3.137	3	-7.6783	35.3726	-5.1229	18.3	115.9	0.8073	6.6654	-20.1	3.6231	13.4263	0.9686	-1.1814	-5.6956	10.9
2003-10-01	16.8334	-0.312	141.294	24.0362	21.3031	42.8	7.8389	40.907	8.3499	77.4	60.6	3.5375	8.3122	34.8	4.553	51.1383	17.8248	-0.7621	15.905	101.1
2004-01-01	11.4857	30.729	123.916	6.6397	70.4665	112.3	13.1773	33.4401	6.0576	149.2	482.4	6.1453	32.3091	-41.4	11.4318	108.478	16.4158	2.9781	26.19	376.7
2004-04-01	10.5955	17.983	70.5819	35.1543	17.9825	20.2	-3.811	50.8116	18.8843	86.4	115.2	2.7062	5.4448	136.9	9.3441	69.5914	33.3172	-1.0168	9.5948	184.2
2004-07-01	9.1482	15.523	80.4448	10.9067	-19.039	132.8	3.8139	10.8782	12.2079	25	249.4	-0.6873	23.1982	72.1	8.3779	76.4109	17.6019	4.1325	19.9475	191
2004-10-01	9.2419	-1.345	167.978	15.316	38.1082	58.3	10.6785	63.9146	1.971	149.4	184	6.4169	34.2197	94.8	-1.738	90.6546	-5.1624	-4.7609	15.4941	309.7
2005-01-01	6.3277	110.153	211.223	22.3616	23.0456	210.1	30.6237	50.1715	6.9313	117.8	538.2	4.7569	92.529	2.2	5.5711	137.05	32.0258	4.4891	34.8789	137.5
2005-04-01	-37.516	32.9615	161.232	16.0908	86.063	133.3	17.7427	54.2499	5.5991	149	314	5.7835	71.4894	132.7	6.5052	71.9012	21.243	-5.1676	2.163	237.8
2005-07-01	16.4388	11.0757	171.625	38.2549	82.7368	89.9	12.3003	37.6371	5.0358	82.3	274.9	1.4462	28.8109	101.2	9.4657	158.195	37.0465	-2.3079	18.9604	219.2
2005-10-01	15.0494	1.1159	213.861	8.3417	-10.1236	75.3	8.5501	74.7449	14.3779	278.9	193	4.8591	55.4217	118.6	9.3365	68.4464	16.2246	-2.4534	8.4926	-17.5
2006-01-01	23.0019	58.1722	230.743	37.9488	106.277	219.3	17.5206	106.202	19.267	181.5	623.5	16.6227	107.072	36.2	11.9065	237.613	48.5027	3.2001	56.8657	431.4
2006-04-01	25.031	22.5515	98.9197	52.8517	35.966	131.9	9.3612	31.3491	12.5677	76.1	134.5	3.3123	55.8799	58.3	14.5656	226.91	33.5774	-3.3366	-7.9545	243.2
2006-07-01	30.9573	8.0051	153.42	38.2039	42.526	103.7	22.6455	36.501	-1.8324	181.3	294.6	5.1046	42.7336	29.4	9.3762	175.262	44.1486	-0.1376	23.4229	303.9
2006-10-01	14.3454	34.1375	262.025	17.5186	-0.4187	151.2	8.5509	56.6084	17.3765	163	215.4	9.4634	52.5078	91.7	15.5656	173.15	34.2329	0.8553	33.4125	348.4
2007-01-01	30.4928	47.2807	224.952	52.2134	253.19	224.1	28.5788	81.7897	11.426	288.7	855.7	4.6586	67.8674	133.1	20.7716	278.118	55.4199	3.9647	73.0068	553.7
2007-04-01	26.7443	59.5553	229.75	51.0366	10.3304	283.1	19.6011	82.2863	4.594	209.8	535.9	6.1258	107.344	81	21.9251	198.668	23.1684	1.8093	11.1289	581.3
2007-07-01	36.8569	9.7267	186.845	25.4431	5.84	167.8	23.0288	-2.3163	7.8426	19.5	360.9	2.9327	-2.0113	144.7	18.4734	271.087	35.895	0.958	36.0557	225.2
2007-10-01	7.4462	29.0895	386.961	32.6088	108.071	127.5	21.6587	31.7333	22.295	171	286.3	5.8275	49.2208	98.4	32.0358	176.384	21.3131	1.1411	31.8585	203.1
2008-01-01	22.4682	44.9491	175.921	55.6458	-29.6508	302	11.664	18.7935	17.6254	277.9	400.4	2.8226	-12.0572	172.8	10.672	207.965	31.2881	2.3849	39.8299	266.6
2008-04-01	28.2052	47.0351	104.062	26.4956	-125.727	72.5	41.1249	58.2362	19.4094	85.6	-623.1	1.6721	83.6596	-8.8	8.554	116.904	42.0704	-5.1784	-6.5193	-160
2008-07-01	19.7822	-0.8971	118.488	23.8655	27.2054	115.2	-4.6256	2.4863	12.2454	-15.7	-23.5	-1.4641	-22.5317	60.6	5.8743	139.418	41.5485	0.7354	26.1131	-85.4
2008-10-01	-1.1609	-21.2929	-224.783	6.8006	-90.88	-186	-2.5912	-31.271	-1.6966	-111.6	-853.1	-5.2155	-115.452	-62.4	-16.0213	-260.914	30.9103	-1.9375	-0.4059	-343.8
2009-01-01	8.3157	-0.5407	-45.9904	18.5892	-8.3472	-30.6	9.3151	-28.5118	13.9993	-45.9	-96	0.1819	57.3271	-22.5	-4.1418	184.413	-14.7179	-0.8376	6.1292	-112.2
2009-04-01	19.6188	-2.8381	68.178	6.3161	45.5792	106.1	-9.3724	9.7604	-0.9959	82.3	-202.4	-1.2343	9.7618	50.4	3.6596	-117.399	-13.1114	-0.2621	11.3187	-22.7
2009-07-01	28.9921	8.9737	120.996	35.9716	-59.4646	-54.2	-7.0674	12.5195	-8.8801	112.2	-92.5	-0.2489	17.4784	14.8	4.3863	53.831	6.787	1.353	9.8755	274.7
2009-10-01	37.2962	-16.1687	164.585	15.1572	-21.2068	43.2	0.1198	16.4539	42.8042	36.4	-39.2	6.8762	-69.5652	-17.5	7.3444	26.7877	-9.0051	2.4367	-0.9887	-61
2010-01-01	17.2071	26.285	150.813	32.1637	-11.1877	115.5	28.1314	-9.9762	-6.2803	174.7	189.2	2.9833	29.0549	91.8	7.9623	76.6477	23.6936	-1.9382	40.3132	262.3
2010-04-01	15.4797	6.294	155.346	14.909	-29.9693	146.2	-6.5381	-15.2109	44.1927	-24.9	91.9	5.5028	-25.7048	144.5	12.5358	89.1139	55.9652	0.9355	9.8396	171.2
2010-07-01	17.1335	-8.5389	93.3599	2.8656	22.2408	114.7	18.337	-11.7795	-22.5854	115.8	319.3	2.9877	6.8129	223.8	10.1803	169.029	-8.7467	7.0317	15.9925	316.1
2010-10-01	31.5752	-50.6662	217.102	42.7577	51.9501	157.2	-14.6785	14.6788	66.373	29.1	-172.7	5.0183	0.8462	6.1	8.7807	-82.3057	31.4801	0.6423	3.3061	207.3
2011-01-01	25.7597	51.8988	197.78	27.6561	-6.0818	67.6	8.4828	19.5746	29.7561	81.2	133.3	5.9262	37.4774	181.1	16.7685	242.427	46.9753	11.6066	47.9126	395
2011-04-01	40.3027	-1.3268	201.719	26.842	48.4543	112.4	-13.4113	7.0586	3.4698	128.1	48.4	0.9054	8.3452	12.5	11.0727	133.469	2.1551	-1.1609	13.5639	4.6
2011-07-01	30.7297	-1.7673	245.481	17.0152	6.71	227.1	3.1141	4.2013	72.3755	-26.7	55.5	1.1395	40.9981	153.1	18.1476	99.6238	68.0169	0.2454	31.3343	89.9
2011-10-01	-3.3032	11.3325	170.692	33.3781	2.4666	-79	5.2381	3.3515	13.3493	-253.6	-144.8	3.5471	-8.4921	-41.6	7.4001	50.6326	-17.0117	-6.1802	1.9985	-12.7
2012-01-01	15.4064	9.1745	260.37	6.7124	46.1375	328.2	24.7234	29.5015	19.319	46.1	175.1	-2.1223	2.5155	110.7	13.8232	138.743	60.1323	-1.3255	36.7237	-69.2
2012-04-01	8.9631	-0.9918	211.109	15.3683	-37.6939	131.1	11.5643	35.5351	30.0846	-11.2	-196.8	3.3239	13.1166	90.7	13.5295	31.2347	5.456	-0.6956	17.3474	-169.5
2012-07-01	20.6563	-0.9652	188.683	61.2013	24.488	24.8	-0.212	-44.3549	6.5869	-72.4	-74.1	0.7491	-21.9268	110.3	18.636	95.9	23.2027	0.4163	30.0744	303.9
2012-10-01	26.5097	-4.8847	275.756	45.0192	-3.9733	-31.2	-20.6148	22.495	-25.2524	5.9	-153.7	5.4084	-11.4356	68.5	15.9491	-15.7185	3.7734	0.5675	-24.9571	107.2
2013-01-01	8.1208	11.6744	192.613	8.5685	35.3399	24.3	31.051	3.1788	-35.3579	110.7	-75.7	3.429	-1.9189	-4.7	18.3402	110.934	2.0735	0.7521	29.2814	222.1
2013-04-01	10.1798	6.6266	333.084	4.218	10.7465	70.8	-15.4831	-11.1997	-7.2664	62.1	-45.9	4.3784	18.1292	11.8	20.9013	111.862	40.7644	-0.3136	11.0366	226.2
2013-07-01	21.5645	0.0437	190.768	21.4731	52.4241	-11.7	1.0975	-36.8863	-8.7377	-13.4	-247.3	0.6274	24.6099	103.2	25.1856	112.819	19.3583	0.5439	45.6897	36
2013-10-01	33.2109	-9.4929	261.025	39.7591	13.678	-35.6	15.1512	5.5624	18.2801	-92.4	-79.8	8.8029	-11.3913	140.9	24.836	65.1338	41.4767	2.3434	-2.1802	168.6
2014-01-01	15.5122	2.316	266.648	25.8948	1.5853	130.2	11.8114	47.118	12.1841	182.7	94.4	6.2345	33.808	1.4	18.1888	119.596	32.8241	0.1112	47.2721	200.1
2014-04-01	34.0746	9.4276	173.521	31.1713	4.213	145.2	0.1335	49.0624	7.6648	108.3	32.8	3.4285	50.5268	140	31.6343	56.654	11.0741	4.7385	2.8636	229.2
2014-07-01	14.2501	-18.0409	185.238	24.2651	-0.4666	86.4	7.6012	29.7641	5.7893	7.3	122.2	5.436	42.7758	136.5	19.8243	64.0708	5.895	0.3531	-9.1257	353.9
2014-10-01	27.7239	-7.9713	124.45	47.7203	-18.1418	7.8	8.9937	7.5101	-9.2238	-29.9	-98.5	4.4918	52.1831	84.1	32.1893	26.9483	53.7813	2.7727	-12.4662	87
2015-01-01	36.3388	5.5384	611.74	27.4578	16.5914	255.4	-7.8112	63.6833	29.5658	197.4	45	8.0568	84.5981	151.5	18.0624	105.155	26.6549	1.8411	29.599	364.2
2015-04-01	33.6121	-11.4759	111.417	42.5726	23.8759	-13.6	-5.1439	47.9267	11.6374	-37.8	-234.6	-1.0237	25.1405	15.7	31.6532	20.8156	10.7862	1.1922	-1.8251	57.4
2015-07-01	23.0268	-1.2551	363.243	35.183	27.6249	103.2	10.1941	40.1806	-6.2331	-20.8	-46.8	-0.6217	15.9877	137.8	17.7518	237.081	35.7601	1.1787	14.6227	-62.1
2015-10-01	20.0454	-12.4642	156.782	50.6881	64.2223	-64.6	-1.6448	11.4762	-38.9062	-95.4	-57.2	10.2566	6.7644	97	8.8295	32.6818	-18.3813	0.1165	-41.5206	-156
2016-01-01	-7.2755	-13.3375	200.628	6.8385	-7.8041	162.3	34.9775	29.6845	56.1831	153.1	-102.3	2.2385	43.0804	174.7	17.1592	156.753	18.4031	1.246	35.44	52.5
2016-04-01	13.7813	-2.8851	169.855	55.9135	52.9915	175.2	1.1905	50.7298	-14.5298	111	224.4	-0.6012	37.4353	175.2	34.1245	119.635	31.3274	-0.4815	-1.0701	367
2016-07-01	0.5322	-6.1414	94.9841	33.2861	82.8712	55.3	9.6914	23.2247	2.4487	63.7	10.6	10.6435	1.618	176.8	30.7225	158.916	-9.4291	-1.5341	0.8281	43.6
2016-10-01	19.1007	-17.8813	-26.5276	47.4444	49.7851	27.2	0.9806	18.109	-42.4015	-20.2	-71.4	7.1713	13.7587	88.5	21.2519	-12.4921	-12.0737	5.0271	-27.5652	-130.1
2017-01-01	0.776	19.5902	160.063	46.0478	2.8451	260.2	28.9059	68.2013	53.407	226.7	154.3	6.2921	75.3855	13.2	42.3629	190.117	19.3228	-1.3993	58.873	364.9
2017-04-01	18.8328	5.2175	462.204	19.8805	60.4633	56.5	-10.9313	33.9865	-20.2241	41.6	60	0.7831	25.8968	92.8	23.5435	61.5794	-11.6517	1.0671	0.0289	334.1
2017-07-01	14.6807	-0.9503	-88.4443	20.327	-32.2757	74.2	13.3016	31.1647	19.2225	24.6	154.6	5.3519	33.0664	175.2	32.09	48.9682	4.2632	-1.5962	20.8353	408.6
2017-10-01	17.5882	-0.0588	7.4367	85.5753	30.8987	44.8	23.3939	49.0275	-16.9485	-33.9	167.6	9.2223	35.6995	2.6	27.0803	-17.0532	10.3433	0.6807	8.5323	82.2
2018-01-01	45.9717	22.5106	94.3958	-3.9158	-17.3158	217.8	-1.354	59.3612	20.4603	248.9	119	2.8482	60.4245	179.7	29.8889	112.903	-1.1935	1.1451	21.7041	340.6
2018-04-01	24.9551	-0.5195	0.374	29.4696	-74.9338	139.1	-3.2213	49.0179	-0.6613	132.5	-88.2	3.4116	32.8256	117.1	23.8502	53.6194	20.7165	0.1529	12.5443	-216.5
2018-07-01	-6.5641	2.2595	-71.0987	45.5172	-27.816	63.6	6.5988	49.2955	19.9717	37.3	-104.4	2.9865	43.2972	159.7	34.8034	-109.648	15.9595	-0.1042	-9.837	117.3
2018-10-01	6.7494	-43.7789	-453.218	59.7284	-33.4242	20.5	-13.1509	20.7121	-20.429	-77.4	185.8	5.0319	-11.2566	39.7	13.0299	-353.034	15.8687	2.2571	-2.1413	112.6
2019-01-01	4.2829	25.8717	165.003	13.1426	-28.4639	152.7	-10.0135	44.7107	60.6195	345	19.6	3.373	20.0929	205.2	20.8991	85.075	17.4407	1.4003	10.0177	104.3
2019-04-01	22.6808	15.6711	-86.4277	60.1553	10.1372	101.4	15.1867	46.5964	-2.9137	203.2	-57	4.6973	19.3029	64.8	35.577	-39.8554	19.3037	-1.3762	-6.5769	164.4
2019-07-01	31.471	15.1892	35.7799	38.9348	0.9688	19.3	21.4698	15.3982	10.3967	122.6	11.9	4.2597	53.3476	133.3	15.9396	244.357	-1.5501	0.4248	30.76	145.4
2019-10-01	16.8618	-30.5018	-254.006	88.7091	65.856	-55.9	-0.297	43.0531	-48.2709	-304.6	-176.7	8.6253	32.384	26	17.8877	-146.793	15.2916	1.0371	-16.1988	22.1
2020-01-01	32.2206	13.4017	-25.1496	-21.8723	0.8758	270.2	31.5533	81.169	51.4888	481	674.2	7.4128	38.7684	487.5	34.0555	74.4539	18.0636	0.7774	47.2149	848.4
2020-04-01	-22.0558	9.9491	70.7401	13.6066	-146.446	116.7	19.8471	56.562	-10.9624	-171.4	-322.7	4.5051	15.5684	-120.9	1.8131	3.2977	-11.9042	0.5978	-7.8364	-256.2
2020-07-01	30.2314	-7.5909	20.9583	8.0901	29.5309	243.3	13.8169	9.7054	-3.7406	70.5	16.3	9.5829	35.3058	82.1	22.625	32.6863	2.2184	2.7563	21.5025	-71.6

## Sheet: CREDIT
	AU	AT	BL	CA	CH	DE	DK	ES	FI	FR	GB	IL	IT	JP	KR	NL	NO	NZ	SE	US
1980-Q1	97.109	56.836	74.793	349.687	291.375	878.634	474.058	67.805	26.62	433.827	132.698	9.162	102.505	333521	23657.4	203.813	358.951	10.14	571.32	2710.19
1980-Q2	102.65	59.059	76.875	363.126	300.192	904.186	483.148	70.514	27.774	455.099	138.468	9.399	109.147	339201	25703.9	208.855	368.594	10.246	590.152	2749.69
1980-Q3	105.457	61.141	77.034	373.289	305.246	918.879	492.337	73.186	28.835	467.632	143.083	10.079	110.466	346834	28275.5	212.601	382.85	10.717	600.008	2812.03
1980-Q4	109.377	62.856	78.722	387.586	318.137	958.105	501.527	76.893	29.483	487.886	147.699	11.035	123.133	358230	30845	219.273	395.876	11.546	604.212	2894.88
1981-Q1	113.264	64.159	79.239	403.878	321.689	974.18	512.25	79.131	30.301	502.029	152.314	11.389	127.17	364573	32757.1	221.504	412.038	12.512	621.052	2938.91
1981-Q2	120.024	66.386	80.164	425.61	333.18	996.901	527.324	82.6	31.492	514.712	156.93	12.223	131.359	369443	35548.8	226.351	421.815	13.797	638.079	3034.36
1981-Q3	124.957	67.665	80.84	444.712	336.62	1014.13	534.042	86.161	32.747	529.844	165.007	12.954	134.924	380023	38055.8	228.838	433.17	14.937	655.293	3115.28
1981-Q4	129.804	69.96	85.506	452.03	336.62	1039.53	541.112	91.743	34.07	552.911	176.546	13.679	146.251	393716	41447.3	232.695	445.953	16.174	672.507	3185.02
1982-Q1	136.293	70.817	86.363	460.427	329.777	1041.42	550.838	94.247	35.63	567.962	182.18	14.277	145.854	400484	43891	237.184	463.992	16.568	693.272	3231.28
1982-Q2	143.119	72.203	86.824	464.853	334.536	1060.84	563.918	98.178	37.194	587.983	192.802	14.666	148.036	405086	45420	237.287	484.893	18.113	714.268	3303.72
1982-Q3	148.431	73.08	86.157	465.901	347.832	1077.98	571.994	101.749	38.914	605.083	199.885	15.769	153.252	416776	48517.6	240.898	504.692	18.078	735.495	3351.04
1982-Q4	152.708	74.303	91.018	463.201	356.311	1103.96	579.315	106.947	40.079	636.172	209.53	15.318	165.627	430467	53611.8	241.152	525.828	18.993	756.722	3405.5
1983-Q1	159.358	73.585	91.147	463.348	358.426	1098.04	589.143	110.133	41.664	651.609	217.792	15.597	167.099	440549	56887.3	244.818	544.7	19.135	776.985	3446.8
1983-Q2	164.725	74.743	91.159	464.21	366.922	1120.52	606.434	113.771	42.977	672.256	226.003	16.037	169.265	444894	60096.3	246.184	562.417	20.065	797.474	3538.19
1983-Q3	167.054	75.624	91.794	467.204	371.499	1139.12	616.97	115.743	44.608	688.08	232.918	16.365	171.792	455982	61970.2	248.669	573.969	20.949	818.189	3635.94
1983-Q4	172.263	77.422	94.29	470.662	379.809	1169.95	640.011	120.877	45.209	719.455	240.42	17.409	187.382	469913	65156.2	254.419	593.282	25.057	838.903	3755.83
1984-Q1	176.718	76.587	93.952	480.393	379.965	1171.83	660.035	120.751	46.352	734.035	252.233	17.978	193.876	478305	67801.5	259.575	617.636	24.593	865.795	3858.61
1984-Q2	182.81	78.481	95.017	489.009	390.743	1191.41	690.58	124.757	47.588	757.876	263.932	18.375	203.237	482054	71331.8	260.983	647.682	26.755	892.687	4014.86
1984-Q3	188.484	80.07	94.973	494.834	396.493	1210.21	705.225	124.66	49.339	775.655	272.076	18.548	213.656	497785	74574.5	261.844	671.835	31.296	919.874	4137.95
1984-Q4	195.821	83.814	97.391	501.147	405.563	1235.83	727.926	131.441	51.009	802.131	287.093	18.927	229.758	509478	78324.4	267.227	705.832	32.334	947.061	4298.29
1985-Q1	202.771	83.526	97.307	513.575	413.954	1242.42	746.305	129.91	52.636	804.098	299.002	19.583	232.432	520629	82510.2	270.219	728.638	34.161	971.791	4424.49
1985-Q2	214.124	85.471	98.867	521.982	417.772	1258.29	781.283	133.566	53.717	815.501	302.807	19.849	234.66	523722	87592.4	272.97	748.065	36.947	996.796	4569.16
1985-Q3	223.178	87.148	98.207	539.236	421.539	1263.42	800.474	133.949	55.427	821.516	316.856	19.174	235.488	536082	92294.5	273.969	773.513	39.156	1022.08	4704.38
1985-Q4	234.37	89.677	99.852	551.391	433.573	1293.88	859.82	139.069	57.917	844.626	320.701	20.491	258.178	551429	93976.8	278.451	803.85	42.857	1047.36	4901.77
1986-Q1	242.05	88.455	100.452	563.056	438.621	1294.45	886.979	137.079	59.354	857.544	338.77	20.457	248.669	560916	96474.9	284.156	823.997	46.83	1095.43	4987.45
1986-Q2	258.982	90.49	102.131	578.657	451.076	1312.31	937.424	141.864	61.62	873.443	350.159	20.206	255.543	566338	101390	289.312	885.127	48.689	1144.04	5133.39
1986-Q3	274.975	91.94	101.741	590.462	460.093	1318.93	979.269	142.827	63.034	880.718	358.14	21.027	260.218	582438	103974	292.705	907.49	53.242	1193.18	5281.7
1986-Q4	285.728	96.054	103.267	601.929	468.38	1335.93	1048.41	149.377	64.207	886.427	378.102	21.413	285.364	601199	107761	301.754	937.683	54.574	1242.33	5456.97
1987-Q1	293.253	95.151	104.684	613.586	475.523	1332.06	1068.85	148.978	65.046	916.799	394.537	21.575	285.307	612426	110263	305.797	965.394	58.321	1294.36	5520.98
1987-Q2	309.31	97.081	108.754	637.148	489.019	1343.4	1096.9	153.178	67.532	934.219	408.079	22.585	294.991	640028	114619	314.83	1005.16	60.276	1346.97	5674.74
1987-Q3	321.55	98.922	107.614	654.15	496.504	1363.6	1116.89	154.729	70.493	945.395	427.78	23.225	289.46	662025	118650	312.03	1047.13	61.293	1400.17	5804.13
1987-Q4	338.52	102.634	110.192	677.265	507.323	1380.56	1174.26	163.627	73.569	971.064	439.431	23.4	317.838	685186	121936	321.018	1073.33	63.141	1453.36	5911.79
1988-Q1	357.751	102.677	112.974	702.638	525.034	1383.49	1170.99	164.768	75.611	999.578	465.105	23.674	314.948	697107	124200	330.28	1102.03	67.219	1523.84	6028.66
1988-Q2	379.639	106.249	116.878	727.183	542.914	1402.53	1198.24	171.147	78.258	1030.34	497.667	24.392	332.453	711077	131666	341.665	1136.64	65.008	1594.32	6197.48
1988-Q3	393.737	108.188	120.158	754.389	557.852	1416.85	1203.83	177.284	80.677	1064.46	525.434	24.615	335.675	734802	135518	344.906	1154.44	63.381	1665.57	6333.65
1988-Q4	404.491	112.533	123.688	777.802	574.008	1445.88	1235.16	189.641	88.273	1105.72	546.724	24.546	368.21	761097	139327	360.454	1164.87	67.261	1736.83	6491.31
1989-Q1	421.547	111.881	126.539	800.111	599.223	1456.07	1232.96	193.801	91.672	1123.83	580.57	24.03	371.263	778764	147934	371.415	1194.14	67.409	1823.51	6601.64
1989-Q2	447.621	116.03	133.518	826.945	625.654	1481.35	1256.99	207.036	95.254	1164.94	611.03	24.73	391.143	796882	161471	382.174	1221.46	66.185	1911.16	6762.66
1989-Q3	453.033	120.329	137.022	855.683	638.762	1502.92	1259.33	211.303	98.794	1188.74	640.059	25.375	389.736	828398	171425	384.695	1234.29	67.26	1999.77	6874.16
1989-Q4	462.286	124.655	143.523	884.092	656.732	1541.85	1300.61	221.23	99.705	1229.39	659.858	25.713	428.938	861945	179361	390.725	1242.7	70.019	2088.38	7011.02
1990-Q1	479.92	125.862	143.593	889.725	674.376	1570.39	1301.03	226.185	103.68	1261.32	710.652	26.229	427.019	894816	187752	401.899	1265.94	71.415	2168.89	7136.53
1990-Q2	488.809	130.829	148.551	907.856	693.624	1581.65	1317.76	235.759	109.493	1292.13	737.719	27.002	444.62	906614	200138	414.501	1282.07	71.583	2250.29	7246.88
1990-Q3	492.347	134.047	151.095	923.654	704.621	1614.87	1324.82	241.756	114.908	1315.2	752.882	29.044	442.705	934207	211829	423.292	1274.81	74.072	2332.59	7327.64
1990-Q4	499.821	138.85	154.074	936.894	712.53	1660.97	1362.77	248.345	117.208	1358.34	772.687	29.918	497.679	957307	232360	432.921	1280.62	75.739	2414.88	7399.93
1991-Q1	507.96	139.892	157.726	950.591	720.304	1681.1	1350.11	256.618	117.769	1375.61	793.738	31.281	484.732	967277	252052	445.116	1291.56	77.403	2419.34	7409.39
1991-Q2	503.923	144.761	161.751	962.829	732.125	1724.72	1372.04	265.774	119.082	1391.37	819.997	32.425	511.864	978605	264892	447.784	1314.74	80.506	2423.86	7478.84
1991-Q3	496.964	146.506	163.712	973.186	735.317	1779.53	1360.21	271.753	122.271	1411.61	827.208	33.193	516.043	991646	281814	453.399	1291.31	80.274	2428.42	7481.1
1991-Q4	501.255	151.265	167.002	989.938	740.295	1830.98	1389.03	279.254	123.196	1440.54	818.562	33.63	562.951	1.01328e+06	295827	464.687	1255.35	79.058	2432.98	7520.74
1992-Q1	501.58	151.372	168.617	995.88	745.95	1866.77	1386.08	279.322	127.08	1459.27	832.286	33.708	563.877	1.01579e+06	309340	475.738	1309.36	80.808	2459.39	7552.52
1992-Q2	506.497	155.688	173.257	1010.26	753.153	1911.51	1389.32	287.169	131.297	1482.88	832.144	34.307	584.276	1.02311e+06	322227	483.668	1298.53	80.661	2485.8	7593.97
1992-Q3	515.19	158.931	174.419	1018.57	754.838	1949.54	1377.94	293.476	135.82	1486.04	838.797	34.676	592.469	1.0337e+06	336707	494.634	1290.94	83.41	2512.5	7648.29
1992-Q4	509.756	162.562	193.302	1024.53	754.973	1968.56	1377.27	302.471	138.718	1517.01	862.342	37.267	625.635	1.05158e+06	350235	502.349	1336.43	83.954	2539.2	7711.73
1993-Q1	508.708	162.686	196.212	1043.96	758.301	2012.18	1367.18	301.356	135.358	1544.51	865.061	39.14	623.599	1.05512e+06	364013	510.77	1334.43	82.966	2541.11	7749.47
1993-Q2	505.005	165.155	200.146	1054.64	761.333	2058.04	1371.59	307.268	132.445	1548.35	876.281	39.08	629.725	1.05704e+06	380389	511.744	1345.55	85.175	2543.03	7856.76
1993-Q3	511.537	166.117	202.125	1073.23	759.902	2105.01	1378.81	308.999	129.457	1546.92	892.737	39.119	622.405	1.06511e+06	403203	513.944	1325	88.301	2544.98	7963.07
1993-Q4	511.833	169.218	206.555	1081.01	752.447	2169.89	1398.02	315.569	124.611	1535.32	917.22	41.499	648.38	1.07735e+06	412466	525.135	1335.07	93.039	2546.93	8083.94
1994-Q1	514.534	168.358	208.677	1095.68	760.615	2153.11	1418.91	312.769	125.14	1543.58	916.965	41.12	626.99	1.07381e+06	432705	540.773	1335.6	96.492	2545.18	8189.31
1994-Q2	523.075	171.981	213.166	1103.97	764.927	2187.78	1420.58	316.465	124.652	1542.54	904.108	41.373	633.61	1.07024e+06	455418	550.532	1330.62	96.307	2543.42	8324.19
1994-Q3	535.376	173.198	216.635	1113.11	768.814	2231.4	1404	316.082	124.128	1543.53	910.958	41.558	624.197	1.083e+06	485209	557.048	1331.23	98.516	2541.64	8448.31
1994-Q4	542.845	176.991	219.014	1127.49	770.723	2283.97	1403.1	319.612	124.116	1572.99	922.478	43.605	655.138	1.09444e+06	503397	568.427	1315.48	100.553	2539.86	8616.38
1995-Q1	551.303	175.304	221.455	1151.19	773.753	2231.4	1417.74	356.301	123.045	1579.9	930.882	44.844	655.138	1.09239e+06	526296	576.523	1330.49	102.655	2531.67	8723.03
1995-Q2	561.768	179.028	223.575	1157.94	779.198	2280.62	1435.92	362.11	122.004	1598.38	942.521	46.65	671.831	1.08695e+06	552586	587.698	1349.45	106.833	2523.38	8891.55
1995-Q3	568.514	181.527	222.946	1170.01	780.205	2309.7	1444.65	362.863	120.709	1604.4	955.502	47.66	671.11	1.09588e+06	577669	589.426	1358	108.674	2515	9035.25
1995-Q4	582.603	187.997	223.897	1180.74	791.278	2343.25	1471.8	367.603	116.724	1594.4	989.008	50.224	691.521	1.10834e+06	596273	594.563	1368.55	117.473	2506.62	9186.36
1996-Q1	593.836	184.123	225.894	1189.03	804.459	2367.86	1504.4	367.319	116.611	1596.86	991.687	50.948	690.129	1.10669e+06	622881	609.469	1396.11	116.999	2520.83	9314.52
1996-Q2	608.651	190.879	230.685	1197.23	810.115	2404.77	1525.54	375.737	117.001	1604.69	1020.28	52.279	699.934	1.10507e+06	652946	623.557	1421.82	121.304	2493.06	9490.37
1996-Q3	611.451	195.967	233.422	1209.27	806.361	2433.85	1552.31	378.338	116.867	1603.08	1030.56	53.386	697.853	1.10487e+06	691136	633.965	1441.82	118.513	2505.76	9634.73
1996-Q4	627.624	198.31	236.67	1221.17	810.651	2478.59	1571.56	388.722	117.65	1624.07	1046.2	54.744	713.413	1.11683e+06	714654	647.237	1469.71	122.853	2548.41	9766.83
1997-Q1	632.684	198.315	243.98	1257.16	818.712	2500.96	1604.07	395.929	120.733	1640.59	995.646	56.771	708.137	1.10492e+06	756129	679.281	1527.84	124.232	2749.89	9892.59
1997-Q2	651.077	206.492	251.384	1278.59	820.576	2533.4	1639.58	406.982	123.632	1655.43	1022.63	62.207	720.372	1.10271e+06	779345	704.061	1618.91	127.655	2777.4	10080.4
1997-Q3	665.526	211.746	257.779	1299.63	818.287	2558	1675.49	416.611	127.23	1662.09	1056.05	65.728	717.496	1.10338e+06	808016	724.861	1657.44	131.971	2797.05	10303.2
1997-Q4	694.203	214.611	263.444	1317.12	820.23	2594.91	1706.47	429.632	129.205	1678.11	1064.13	69.766	740.787	1.12133e+06	869021	711.706	1717.46	139.639	2797.04	10491.8
1998-Q1	708.286	211.347	266.238	1345.34	823.473	2618.4	1725.53	440.389	129.349	1697.13	1090.85	76.075	743.531	1.10303e+06	874737	745.202	1778.85	138.295	2890.3	10701.4
1998-Q2	733.446	216.712	276.455	1379.73	831.088	2648.6	1747.85	462.799	130.158	1712.68	1120.12	79.929	756.249	1.09616e+06	870334	761.427	1861.82	141.792	2923.15	11011.4
1998-Q3	748.673	219.774	282.195	1409.03	826.113	2689.99	1766.16	472.221	130.624	1722.92	1165.33	83.741	752.889	1.09617e+06	884901	786.445	1885.38	143.927	3014.62	11236.5
1998-Q4	764.852	224.302	287.858	1424.77	826.411	2753.74	1760.7	493.188	130.908	1729.29	1190.5	88.637	776.88	1.06914e+06	855781	801.641	1923.02	146.567	3041.68	11513.8
1999-Q1	782.774	224.613	301.503	1423.72	847.452	2715.71	1843.6	524.011	136.738	1745.99	1228.59	95.313	784.816	1.04654e+06	891004	831.838	1966.6	146.933	3136.07	11775.8
1999-Q2	790.236	228.619	309.401	1435.14	861.408	2768.87	1886.04	571.98	142.033	1792.21	1268.46	104.926	827.897	1.03329e+06	866286	851.058	2004.18	147.698	3161.37	12047.2
1999-Q3	811.593	238.083	320.586	1449.13	872.491	2820.16	1894.92	589.314	142.577	1823.39	1291.79	111.862	843.019	1.02843e+06	874010	876.914	2020.95	151.694	3196.19	12394.3
1999-Q4	839.184	246.147	330.193	1455.58	876.063	2896.59	1946.24	617.742	142.577	1866.81	1324.83	123.213	887.046	1.03748e+06	855726	901.159	2079.9	157.282	3321.46	12676.2
2000-Q1	861.493	248.238	341.503	1516.33	894.707	2907.11	2054.8	655.739	146.968	1891.17	1360.65	133.2	893.008	1.02625e+06	881736	918.51	2152.37	163.231	3334.95	12976.8
2000-Q2	894.613	257.235	352.131	1545.45	878.623	2962.24	2056.78	693.816	151.282	1940.88	1415.99	133.992	914.974	1.00881e+06	885575	941.573	2234.48	166.339	3404.09	13306.5
2000-Q3	919.76	271.959	363	1575.35	882.21	2982.21	2154.48	734.535	161.98	1998.36	1453.91	141.149	936.154	1.0081e+06	904154	967.951	2370.03	169.276	3550.39	13573
2000-Q4	957.855	273.066	374.826	1590.15	885.085	3057.73	2175.21	763.679	166.11	2039.01	1476.52	144.261	985.853	1.00455e+06	901294	996.187	2358.9	174.198	3699.07	13810.1
2001-Q1	989.049	273.529	380.447	1650.14	900.683	3088.68	2201.86	783.75	169.229	2085.84	1530.16	149.71	1006.68	994138	925734	998.883	2411.12	179.482	3723.85	13912.9
2001-Q2	994.746	275.699	389.704	1669.19	907.161	3116.86	2251.2	819.707	172.722	2136.81	1557.61	156.286	1032.03	979500	945456	1016.67	2503.23	184.484	3812.64	14246.3
2001-Q3	1015.72	279.766	394.643	1708.78	897.866	3138.31	2311.41	858.981	172.536	2168.12	1589.32	158.854	1045.33	975197	978466	1027.88	2501.04	178.598	3870.99	14557.2
2001-Q4	1025.63	285.361	402.225	1721.62	888.31	3164.81	2385.43	889.105	169.777	2198.63	1633.94	170.185	1079.59	972241	986900	1049.57	2569.41	182.447	4036.15	14732.1
2002-Q1	1041.64	285.175	402.426	1762.64	888.2	3171	2388.39	919.046	180.983	2221.56	1672.03	174.857	1088.71	960634	1.03194e+06	1057.14	2633.5	188.858	4036.15	14898.6
2002-Q2	1087.19	288.177	404.072	1787.65	890.897	3202.64	2398.26	945.792	180.158	2237.3	1715.4	181.781	1112.12	949681	1.07504e+06	1060.01	2652.14	190.293	4069.55	15116
2002-Q3	1127.81	290.964	405.56	1822.7	885.947	3232.76	2447.61	964.031	179.821	2247.66	1794.81	185.952	1119.48	935762	1.11253e+06	1083.41	2689.2	194.541	4104.16	15350.7
2002-Q4	1151.06	292.852	407.657	1844.72	891.167	3231.41	2445.63	999.743	177.428	2273.3	1815.8	186.852	1151.37	939260	1.14704e+06	1092.16	2715.78	198.54	4186.72	15644.7
2003-Q1	1172.12	293.072	407.756	1845.53	900.175	3246.51	2530.51	1025.97	179.031	2304.62	1809.94	180.922	1163.02	924372	1.16783e+06	1103.39	2797.29	202.155	4185.3	15836.5
2003-Q2	1209.49	294.862	418.621	1867	916.659	3267.32	2567.02	1061.95	184.331	2323.7	1864.37	188.679	1192.41	907896	1.17645e+06	1119.87	2872.87	205.78	4252.59	16256.6
2003-Q3	1237.66	296.539	426.978	1882.12	921.792	3263.77	2604.53	1093.22	187.01	2331.54	1899.68	196.122	1200.16	895946	1.18695e+06	1137.71	2875.43	208.306	4266.99	16551.7
2003-Q4	1287.27	303.741	437.72	1897.68	937.641	3268.87	2608.48	1149.92	190.252	2327.72	1924.79	213.313	1247.03	896565	1.19825e+06	1194.26	2864.54	212.632	4276.02	16820.7
2004-Q1	1316.7	305.873	445.336	1958.4	949.103	3231.14	2716.05	1189.47	194.687	2354.49	1946.28	219.209	1253.2	883902	1.20744e+06	1197.35	2978.26	218.657	4287.27	17140
2004-Q2	1362.26	310.742	452.086	1988.42	955.14	3224.12	2766.39	1248.15	200.021	2407.16	1978.48	222.762	1293.5	871859	1.21339e+06	1203.78	3098.32	229.921	4358.9	17534.2
2004-Q3	1397.8	313.305	460.681	2014.64	960.418	3214.07	2835.47	1285.05	202.26	2440.54	2033.12	235.588	1308.69	865614	1.22927e+06	1214.81	3183.75	232.377	4381.4	17909.8
2004-Q4	1444.6	314.894	470.53	2050.93	957.845	3210.29	2908.51	1346.69	204.684	2471.87	2073.15	257.663	1355.18	868075	1.22285e+06	1233.35	3246.64	244.395	4488.9	18399.7
2005-Q1	1478.75	318.139	473.557	2047.78	977.411	3189.85	3038.78	1400.53	207.733	2493.37	2110.95	261.843	1380.29	863664	1.23298e+06	1243.62	3320.84	251.752	4531.55	18727.7
2005-Q2	1545.23	329.86	478.721	2098.17	988.21	3203.62	3150.3	1479.41	214.562	2555.68	2191.12	271.797	1411.23	852360	1.26282e+06	1281.68	3417	258.897	4701.19	19225.9
2005-Q3	1598.15	337.097	481.687	2118.15	1000.59	3204.39	3261.83	1528.23	216.478	2585.57	2250.67	294.904	1430.42	857402	1.2833e+06	1301.93	3487.52	266.8	4769.45	19703.1
2005-Q4	1661.06	339.873	486.319	2125.2	1000.43	3195.84	3378.29	1610.3	220.579	2634.52	2301.21	311.796	1479.95	861255	1.31056e+06	1307.79	3613.05	278.041	4898.45	20183.3
2006-Q1	1700.08	346.898	492.958	2164.56	1013.69	3223.87	3489.81	1698.19	228.45	2675.13	2347.63	343.998	1509.61	858472	1.33843e+06	1320.41	3728.95	285.105	4970.33	20713.8
2006-Q2	1767.03	356.215	502.227	2197.22	1017.71	3254.08	3584.56	1781.98	236.609	2737.65	2413.43	373.95	1553.68	853542	1.39015e+06	1332.24	3851.26	295.48	5118	21283.8
2006-Q3	1827.97	363.612	510.945	2254.45	1050.59	3275.96	3746.41	1855.57	242.111	2780.49	2494.99	391.626	1579.89	855708	1.43551e+06	1357.89	3977.98	303.12	5198.81	21760.4
2006-Q4	1886.55	364.493	517.223	2304.76	1050.23	3257.71	3868.8	1955.35	242.019	2836.12	2522.79	409.713	1634.25	857974	1.487e+06	1364.96	4059.63	310.996	5353.52	22288.9
2007-Q1	1937.02	365.897	534.521	2412.13	1077.5	3263.6	3952.68	2025.76	248.234	2884.44	2529.15	428.189	1663.93	856187	1.53219e+06	1396.11	4242.28	323.327	5573.23	22682.6
2007-Q2	2010.6	378.495	551.644	2448.21	1101.67	3271.2	3998.08	2142.14	256.975	2962.68	2572.56	441.462	1719.65	843083	1.58259e+06	1409.67	4443.94	334.179	5826.47	23303.3
2007-Q3	2090.42	386.559	569.634	2504.39	1122.3	3273.98	4084.93	2193.35	262.545	3015.06	2655.04	456.148	1750.25	848178	1.62402e+06	1432.67	4518.33	341.628	6019.76	23856.6
2007-Q4	2149.88	398.326	584.447	2549.45	1162.29	3310.38	4235.94	2250.92	270.893	3048.94	2710.61	463.578	1824.19	853551	1.67802e+06	1443.19	4737.06	349.643	6310.9	24344.7
2008-Q1	2203.34	404.308	605.164	2633.85	1168.18	3299.62	4306.99	2269.2	274.924	3096.56	2794.86	486.413	1898.35	848896	1.74783e+06	1478.27	4988.93	357.513	6565.57	24652.4
2008-Q2	2251.27	407.84	627.495	2663.36	1180.82	3317.06	4373.12	2327.32	286.458	3180.62	2813.95	505.361	1919.67	849948	1.82255e+06	1510.31	5185.72	366.56	6848.04	24799.3
2008-Q3	2304.06	411.669	648.816	2714.64	1199.09	3336.27	4449.11	2356.39	295.792	3245.84	2846.53	527.671	1924.55	848391	1.89132e+06	1520.7	5401.43	372.353	7076.11	25064.4
2008-Q4	2354.71	418.506	675.671	2773.38	1194.65	3354.34	4512.28	2376.69	303.302	3269.91	2953.64	549.181	1907.51	862643	1.94305e+06	1526.79	5630.44	377.62	7408.02	24788
2009-Q1	2362.63	416.384	689.377	2799.63	1214.73	3350.8	4547.81	2386.27	308.915	3289.9	2930.63	543.575	1940.65	853656	1.98131e+06	1543.75	5651.54	381.679	7464.75	24583.7
2009-Q2	2356.96	415.095	695.47	2835.8	1236	3348.19	4552.74	2388.54	314.087	3306.16	2849.41	537.929	1976.53	847053	2.02426e+06	1556.32	5680.93	380.06	7558.8	24479.1
2009-Q3	2366.82	417.311	702.894	2859.82	1249.66	3326.25	4576.43	2386.64	303.213	3310.93	2885.29	535.509	1964.95	843442	2.06111e+06	1561.51	5571.35	378.753	7658.6	24322.1
2009-Q4	2386.8	417.737	708.146	2878.6	1266.44	3314.03	4595.18	2382.4	300.274	3333.63	2867.01	532.462	1971.47	840346	2.09145e+06	1576.68	5470.99	375.174	7760.61	24111.5
2010-Q1	2402	421.352	700.428	2897.53	1289.15	3316.57	4657.36	2390.96	307.25	3346.68	2901.78	530.133	1979.56	834549	2.12035e+06	1611.4	5524.55	376.507	7759.71	23970.7
2010-Q2	2434.42	428.628	706.904	2947.67	1279.89	3332.86	4661.58	2422.54	316.699	3363.59	2865.82	521.088	1997.04	828261	2.16713e+06	1654.59	5688.31	376.666	7817.68	23842.5
2010-Q3	2455.02	431.237	698.444	2973.13	1291.24	3337.24	4649.97	2408.13	316.027	3388.99	2884.92	507.128	2010.39	823736	2.20234e+06	1672.81	5755.74	375.747	7872.18	23829.7
2010-Q4	2458.81	436.211	691.869	2998.02	1311.38	3291.06	4634.13	2403.16	314.525	3440.88	2844.57	537.81	2024.11	819312	2.23134e+06	1696.71	5848.02	376.596	7849.83	23789.5
2011-Q1	2491.02	435.966	707.512	3045.06	1326.68	3229.41	4660.52	2378.37	321.712	3480.39	2855.41	543.59	2041.72	813176	2.27013e+06	1717.5	5938.04	377.378	8003.24	23766.8
2011-Q2	2509.56	441.84	727.115	3091.59	1353.43	3242.33	4694.31	2379.42	325.187	3558.86	2865.64	544.026	2059.53	806976	2.31082e+06	1752.38	6005.97	378.226	8125.75	23782.3
2011-Q3	2562.95	445.552	739.114	3168.05	1367.87	3280.98	4804.12	2359.62	329.006	3626.94	2868.95	554.785	2062.99	807074	2.3727e+06	1768.92	6060.77	377.72	8267.01	23809.6
2011-Q4	2582.27	450.412	755.011	3180.24	1378.98	3309.04	4853.75	2336.14	333.084	3677.62	2864.06	560.543	2056.33	806638	2400335	1802.08	6105.65	375.501	8321.71	23905.2
2012-Q1	2609.54	451.528	777.602	3231.9	1394.9	3312.86	4914.98	2326.79	337.203	3732.74	2915.26	576.74	2061.12	805132	2.43584e+06	1815.77	6514.77	378.67	8589.25	23936.3
2012-Q2	2650.26	457.707	796.446	3289.99	1405.54	3342.52	4942.44	2310.04	339.68	3788.34	2955.68	588.742	2063.32	793048	2.47883e+06	1841.72	6581.8	380.235	8568.82	23999.7
2012-Q3	2668.44	459.514	802.163	3346.48	1418.99	3375.39	4930.82	2279.81	341.59	3802.53	2982.65	589.885	2055.09	796664	2.52232e+06	1846.95	6629.09	382.348	8720.74	24203.1
2012-Q4	2694.05	457.168	794.356	3378.81	1444.65	3378.35	4999.45	2180.09	344.859	3820.55	2966.01	569.413	2061.02	801124	2.52506e+06	1843.02	6692.37	386.511	8510.05	24406.9
2013-Q1	2717.85	456.872	808.727	3451.39	1449.18	3396.85	4985.73	2141.23	354.539	3829.96	2948.85	555.382	2040.23	799495	2572990	1846.65	6720.94	389.853	8720.32	24403.6
2013-Q2	2784.7	456.974	825.056	3523.26	1449.1	3437.76	4966.72	2112.97	356.017	3816.66	2996.05	541.542	2031.17	795734	2.60196e+06	1856.71	6792.65	392.977	8838.59	24566.4
2013-Q3	2808.15	458.365	808.194	3578.23	1452.71	3464.95	4966.72	2082.62	357.726	3837.88	2981.36	538.146	2024.06	800528	2.62856e+06	1865.84	6827.2	396.852	8805.33	24824
2013-Q4	2873.89	474.498	806.643	3623	1473.76	3488	4876.98	2061.5	360.068	3838.91	2967.92	550.81	2015.11	806299	2.64479e+06	1864.41	6865.18	399.774	8863.16	25093.8
2014-Q1	2894.12	472.564	788.579	3695.88	1487.33	3506.43	4903.37	2027.24	359.714	3885.87	2947.24	552.92	2017.88	805386	2.68222e+06	1868.56	6940.28	404.373	9136.32	25256.4
2014-Q2	2949.49	477.746	801.395	3749.1	1506.74	3546.63	4883.31	2020.8	361.261	3940.64	2939.9	568.983	2022.37	801347	2.71284e+06	1883.24	7028.23	409.431	9174.89	25516
2014-Q3	3006.39	481.025	815.511	3833.42	1518.03	3544.83	5002.62	2003.62	363.177	3984.23	2948.61	576.238	2020.53	805170	2.76787e+06	1891.57	7106.26	413.937	9168.6	25694
2014-Q4	3058.65	472.897	834.52	3872.07	1525.49	3453.15	5020.57	1965.49	377.625	4019.7	2950.61	606.733	2003.55	811921	2.80744e+06	1942.12	7211.7	418.132	9316.98	25966.2
2015-Q1	3136.56	483.566	878.044	4006.8	1535.19	3497.07	5063.86	1975.23	388.628	4099.53	3001.44	880.063	2008.03	811441	2.84526e+06	1983.38	7383.93	423.068	9568.94	26143.3
2015-Q2	3185.25	481.169	847.14	4050.34	1530	3522.31	5042.74	1950.76	398.349	4129.72	2947.46	859.471	2002.38	805366	2.8872e+06	1986	7510.15	428.722	9657.84	26548.7
2015-Q3	3241.96	484.716	879.427	4122.49	1539.11	3549.46	5118.77	1932.06	406.007	4163.3	2972.38	850.456	1996.29	809959	2.95349e+06	1986.87	7658.93	436.186	9766.39	26760.2
2015-Q4	3272.75	487.777	870.59	4165.55	1558.15	3549.79	5114.54	1916.99	400.354	4233.17	2992.84	879.66	1968.34	817651	2.99882e+06	1981.32	7768.82	441.08	10083	26942.9
2016-Q1	3312.53	492.856	943.646	4155.41	1604.48	3598.61	5133.55	1892.76	396.81	4308.37	3026.59	883.25	1957.86	820114	3.03322e+06	1984.14	7774.46	448.973	9981.98	27202.3
2016-Q2	3359.25	496.415	972.92	4239.01	1600	3625.71	5190.56	1906.81	395.156	4374.09	3110.6	885.051	1973.17	823214	3.08233e+06	1989.81	7841.13	455.292	10089.8	27481.6
2016-Q3	3385.36	504.444	978.38	4304.71	1611.72	3658.99	5268.69	1891.74	393.113	4410.61	3187.28	835.916	1971.44	830411	3116270	2044.68	7874.4	465.032	10260.1	27872.5
2016-Q4	3422.11	507.899	985.812	4329.71	1628.47	3670.11	5238.08	1884.94	390.392	4452.97	3189.39	848.562	1950.39	840544	3.16327e+06	2032.42	7945.99	472.609	10402.2	28041.8
2017-Q1	3427.83	515.193	974.842	4405.92	1643.76	3735.17	5235.96	1890.73	398.065	4494.67	3240.38	855.937	1955.94	844764	3.19179e+06	2052.16	7967.29	478.734	10717.7	28360.2
2017-Q2	3477.36	515.746	967.947	4465.47	1663.66	3759.56	5252.26	1892.27	406.584	4532.56	3261.54	840.927	1951.01	843622	3.25054e+06	2050.3	8037.79	484.806	10839.1	28758.3
2017-Q3	3500.3	519.703	954.407	4510.73	1672.43	3797.64	5286.13	1874.58	415.437	4566.58	3315.84	839.606	1933.58	849312	3.30684e+06	2062.56	8052.69	490.528	10922.4	29071.6
2017-Q4	3540.55	524.337	964.278	4569.67	1712.65	3840.14	5302.15	1864.2	422.917	4616.29	3360.89	826.71	1949.3	856880	3.33926e+06	2043.97	8088.97	497.866	11128.4	29567.8
2018-Q1	3586.86	531.109	958.041	4632.52	1760.9	3877.7	5302.59	1861.22	426.33	4688.47	3362.49	835.733	1944.25	857238	3.38975e+06	2069.22	8150.19	502.97	11557.3	29749.5
2018-Q2	3621.49	533.08	966.072	4736.4	1728.29	3953.72	5350.45	1880.44	431.998	4761.7	3414.04	857.026	1958.46	864103	3.44694e+06	2061.86	8205.6	510.571	11693.5	30333.3
2018-Q3	3674.68	539.496	961.484	4784.17	1724.13	4020.04	5393.78	1876.78	435.303	4818.73	3421.09	870.467	1958.39	870609	3.50567e+06	2065.87	8263.73	515.67	11844.4	30650.4
2018-Q4	3714.73	543.071	972.423	4832.08	1722.58	4023.81	5443.86	1855.29	435.14	4872.84	3450.94	905.684	1957.46	880342	3.5565e+06	2064.86	8318.1	522.096	11926.3	30986.2
2019-Q1	3751.35	547.084	981.226	4884.48	1752.17	4083.42	5536.2	1876.31	439.466	4954.97	3356.34	894.843	1945.66	885350	3.59734e+06	2075.74	8409.27	525.895	12326	31260.6
2019-Q2	3798.69	556.499	991.869	4973.39	1772.75	4142.84	5649.27	1877.79	439.782	5035.74	3412.13	905.527	1952.04	889852	3.66517e+06	2078.47	8613.73	533.476	12547.5	31614.2
2019-Q3	3821.34	553.209	1009.68	5047.78	1794.23	4180.94	5758.64	1881.65	442.63	5115.85	3482.05	921.267	1959.68	899886	3.72203e+06	2082.72	8748.8	539.733	12744.9	31970.5
2019-Q4	3833.5	554.611	994.189	5086.19	1862.65	4208.21	5834.03	1865.31	440.78	5143.06	3462.97	887.757	1955.52	908728	3.7832e+06	2070.45	8864.93	544.268	12855.1	32236.8
2020-Q1	3927.18	563.184	1036.02	5184.29	1859.06	4253.28	5731.82	1866.42	448.63	5202.55	3509.14	897.59	1946.63	915410	3.86453e+06	2095.54	9105.87	554.575	13122.7	33128.3
2020-Q2	3878.59	569.471	1045.46	5269.34	1874.48	4333.56	5736.5	1915.57	454.068	5371.46	3580.76	880.845	1971.08	958324	3.96146e+06	2096.54	9185.99	552.184	13164.7	33773.4
2020-Q3	3864.35	573.423	1041.74	5326.44	1891.14	4370.13	5756.35	1906.06	456.295	5434.84	3576.79	837.959	1994.54	964766	4.06142e+06	2096.82	9222.72	555.841	13255.8	34013.5
2020-Q4	3853.97	573.549	1051.89	5390.41	1895.62	4396.35	5772.16	1909.1	456.043	5466.72	3597.85	824.862	1987.28	974090	4.13586e+06	2050.37	9195.83	562.28	13396.5	34359.3

## Sheet: LOANS
	AU	AT	BL	CA	CH	DE	DK	ES	FI	FR	GB	IL	IT	JP	KR	NL	NO	NZ	SE	US
1980-Q1	34.259	40.771	50.057	109.322	202.222	544.426	360.997	58.416	11.428	268.761	79.292	7.241	84.962	195955	18950.3	94.067	87.28	8.622	389.233	1462.08
1980-Q2	36.264	42.366	51.45	115.017	208.342	559.768	367.919	60.75	11.915	277.369	82.964	7.365	89.12	198320	20586.3	96.407	91.147	8.66	402.063	1457.72
1980-Q3	36.862	43.86	51.557	117.901	211.85	568.093	374.917	63.053	12.365	284.57	86.499	7.819	90.39	201837	22544.8	97.999	93.543	9.104	408.778	1484.3
1980-Q4	38.03	45.09	52.686	124.392	220.796	592.243	381.915	66.246	12.655	299.744	89.547	8.443	97.828	208478	24600.4	100.715	97.002	9.636	411.643	1531.38
1981-Q1	39.207	46.025	52.956	131.813	223.261	600.265	390.08	67.771	13.011	305.656	92.931	8.739	100.58	210530	26107.4	101.458	100.607	10.386	424.021	1541.45
1981-Q2	41.844	47.623	53.696	142.014	231.236	612.548	401.56	70.23	13.513	314.636	95.462	9.054	103.42	212878	28302.7	103.655	107.376	11.45	436.401	1579.51
1981-Q3	43.538	48.54	54.13	155.558	233.624	621.26	406.675	72.756	14.041	324.606	99.684	9.495	105.928	219483	30201.3	104.343	108.983	12.517	448.779	1618.03
1981-Q4	45.188	50.186	55.245	164.077	233.624	635.249	412.059	76.818	14.594	341.41	109.374	9.911	112.654	227806	32907.3	106.233	113.486	13.084	461.158	1642.13
1982-Q1	47.189	50.801	55.802	171.28	228.875	634.686	419.466	78.93	15.204	349.991	116.116	10.09	113.172	231520	34808.3	107.895	117.597	13.42	476.65	1654.32
1982-Q2	49.347	51.795	56.055	174.661	232.178	645.405	429.426	82.128	15.815	363.406	121.519	10.152	115.099	232817	36252.1	108.148	122.555	14.642	492.141	1680.34
1982-Q3	50.717	52.425	55.151	174.6	241.405	654.641	435.576	85.055	16.487	374.748	128.416	10.659	118.683	240600	38723.8	109.281	126.052	14.557	507.633	1689.3
1982-Q4	51.558	53.302	57.147	172.276	247.29	669.575	441.151	89.219	16.942	395.535	133.218	10.365	126.157	248222	42427.5	109.161	130.581	15.113	523.123	1694.6
1983-Q1	54.687	52.787	56.907	170.69	248.758	666.937	448.635	91.69	17.639	401.462	138.705	10.276	128.76	251090	44875.7	110.471	136.941	14.728	539.699	1697.09
1983-Q2	57.157	53.618	56.836	167.891	254.654	682.629	461.802	94.506	18.231	412.744	143.901	10.441	131.761	252538	47410.5	111.726	145.169	15.538	556.276	1732.64
1983-Q3	58.072	54.25	57.466	167.144	257.831	695.839	469.825	96.057	18.948	424.327	149.119	10.575	134.978	259807	48978.2	112.382	144.983	16.379	572.852	1784.78
1983-Q4	60.458	55.539	58.771	166.929	263.599	716.929	487.371	100.01	19.262	443.622	154.68	10.942	145.294	269764	51419.2	113.196	148.936	17.486	589.427	1855.72
1984-Q1	62.919	54.94	58.273	169.922	263.706	718.971	502.619	98.553	19.801	449.177	161.748	10.942	149.686	273383	53472.3	114.759	157.863	17.042	607.595	1917.92
1984-Q2	66.216	56.299	59.344	172.481	271.187	732.425	525.879	100.236	20.375	461.776	168.283	11.278	155.638	274895	56209.8	115.263	168.442	18.528	625.761	2007.76
1984-Q3	69.302	57.438	59.197	174.283	275.177	745.392	537.032	98.787	21.151	473.162	175.31	11.601	162.173	287292	58707.5	115.523	173.706	20.075	643.928	2078.18
1984-Q4	73.237	60.125	60.477	176.01	281.472	762.75	554.319	102.563	21.896	490.524	182.346	12.045	171.797	295096	61458.7	117.478	186.016	20.816	662.094	2162.46
1985-Q1	76.422	59.918	60.242	183.541	287.296	768.692	568.314	101.904	22.791	499.443	190.771	11.996	174.208	302955	64621.5	118.645	193.753	22.328	678.629	2202.66
1985-Q2	81.852	61.313	61.467	185.204	289.946	780.64	594.95	105.191	23.475	511.848	197.541	12.146	176.388	304228	68656.3	119.829	210.953	24.224	695.167	2265.71
1985-Q3	86.103	62.517	60.719	191.193	292.56	785.675	609.565	105.998	24.409	523.115	204.733	12.358	177.818	313988	72425.3	121.119	222.193	26.215	711.704	2321.85
1985-Q4	91.447	64.33	62.922	195.792	300.912	807.048	654.756	110.404	25.646	539.763	211.716	12.686	191.128	327071	73821.2	122.745	243.622	27.84	728.238	2402.96
1986-Q1	94.799	63.454	63.572	200.953	304.415	809.618	675.438	109.498	26.473	544.22	220.703	12.178	187.048	330229	75884.6	125.26	253.32	30.138	766.706	2418.12
1986-Q2	102.87	64.913	64.848	202.874	313.06	823.362	713.852	113.747	27.626	551.463	229.249	12.011	191.882	333152	79714.1	127.801	275.667	31.106	805.173	2454.65
1986-Q3	110.456	65.953	64.494	206.166	319.318	829.879	745.718	115.1	28.449	558.886	240.331	12.334	195.534	344289	81761.8	129.932	289.194	32.368	843.643	2503.17
1986-Q4	115.365	68.905	66.676	208.525	325.069	843.093	798.371	120.696	29.18	574.498	251.78	12.561	210.309	358111	84758.8	132.687	308.291	34.133	882.11	2601.54
1987-Q1	120.358	68.257	68.198	211.191	330.027	840.684	813.93	122.712	29.673	583.577	260.017	12.564	211.211	363306	86675.5	134.572	318.706	35.545	917.241	2597.96
1987-Q2	129.723	69.642	71.848	217.353	339.394	848.092	835.293	128.248	30.81	601.533	270.018	13.101	217.417	369800	90378	136.132	333.19	37.409	952.371	2664.87
1987-Q3	137.152	70.962	70.808	223.06	344.588	861.217	850.514	131.798	32.134	613.603	282.274	13.574	215.365	382487	93421.7	135.137	352.565	38.331	987.501	2732.58
1987-Q4	146.996	73.625	72.996	232.555	352.097	872.249	894.206	140.929	33.503	639.486	295.574	13.93	231.739	398126	95524.7	139.331	378.978	40.006	1022.63	2792.74
1988-Q1	156.316	73.656	75.23	238.589	364.389	875.295	891.712	143.392	35.425	650.651	312.492	13.895	233.318	404429	97115.7	142.686	387.951	42.68	1079.93	2847.16
1988-Q2	166.993	76.218	78.272	248.088	376.798	888.731	912.468	149.835	37.583	668.764	331.265	14.169	245.979	410914	102824	146.184	400.003	42.391	1137.22	2924.22
1988-Q3	177.062	77.609	80.894	257.455	387.165	899.139	916.725	156.112	39.665	683.117	350.79	14.621	250.914	426321	105900	147.075	390.878	43.145	1194.51	2980.28
1988-Q4	187.375	80.726	83.678	265.772	398.378	919.032	940.577	167.115	43.765	713.011	365.587	14.813	271.778	441698	109002	151.365	398.879	44.026	1251.81	3043.11
1989-Q1	194.421	80.259	85.958	274.661	415.878	927.027	938.907	170.743	45.401	725.58	383.795	14.544	278.813	452040	115217	155.149	403.962	44.203	1317.27	3067.88
1989-Q2	206.949	83.235	91.911	284.302	434.222	944.771	957.202	181.273	46.859	753.254	400.992	14.935	295.052	457062	125606	158.654	416.754	45.116	1382.74	3128.51
1989-Q3	213.742	86.319	94.85	291.466	443.319	960.138	958.981	184.993	48.418	764.565	422.986	15.227	299.783	477771	133358	159.441	421.232	46.77	1448.2	3167.28
1989-Q4	219.764	89.422	98.599	299.72	455.791	986.701	990.42	193.014	48.697	801.297	439.378	15.558	326.581	493087	140228	161.402	434.149	48.744	1513.67	3184.84
1990-Q1	227.51	90.288	97.988	306.797	468.036	1004.22	990.737	193.982	48.886	810.154	457.617	16.048	329.382	508143	146310	164.79	442.569	49.829	1562.7	3213.3
1990-Q2	235.774	93.851	102.094	318.13	481.395	1010.57	1003.48	201.559	49.864	822.016	469.304	16.179	342.833	512283	155780	169.099	449.407	49.455	1611.74	3205.08
1990-Q3	240.897	96.16	103.979	322.171	489.027	1031.08	1008.85	206.025	50.467	824.136	481.568	17.437	345.721	526655	164900	171.023	445.667	50.639	1660.78	3192.87
1990-Q4	245.32	99.605	106.634	322.376	494.516	1059.89	1037.76	212.633	50.135	832.153	492.349	17.826	379.523	538487	179319	172.823	445.551	51.618	1709.82	3165.21
1991-Q1	245.336	100.353	109.374	323.833	499.912	1074.43	1028.11	219.157	49.94	840.386	501.886	17.324	377.129	544857	192110	178.069	449.534	53.048	1722.58	3120.15
1991-Q2	247.669	103.845	112.534	326.839	508.116	1104.52	1044.81	225.231	49.928	850.891	505.688	17.493	396.565	547672	204482	179.018	446.427	54.198	1735.35	3091.93
1991-Q3	248.517	105.097	113.849	329.022	510.331	1129.31	1035.8	230.443	50.413	851.238	512.985	17.982	403.58	555491	204851	181.293	431.054	54.531	1748.12	3037.3
1991-Q4	248.789	108.511	115.872	330.321	513.786	1174.83	1057.76	238.044	50.22	854.058	516.82	18.514	433.814	566968	228370	186.125	422.954	54.692	1760.88	3017.37
1992-Q1	248.308	108.588	117.316	330.268	517.711	1197.8	1055.51	236.203	49.84	855.829	520.271	17.847	438.376	564751	239301	189.559	415.744	56.673	1773.98	2975.7
1992-Q2	250.104	111.683	121.306	334.99	522.71	1234.01	1057.98	241.878	49.382	865.532	528.219	18.424	453.52	565533	250015	191.586	405.576	56.266	1790.2	2944.78
1992-Q3	257.974	114.011	122.114	339.577	523.879	1254.86	1049.31	246.2	48.995	866.571	531.316	18.504	462.076	568834	260978	194.964	416.401	58.782	1805.22	2933.44
1992-Q4	258.402	116.615	128.179	337.657	523.973	1278.03	1048.8	253.426	48.334	869.881	532.686	19.371	484.202	580184	274047	196.878	425.854	59.142	1830.39	2921.29
1993-Q1	263.076	116.704	127.304	343.148	526.283	1295.43	1041.11	251.675	48.186	865.754	532.818	19.666	484.787	578843	285087	201.514	414.203	58.458	1829.23	2898.47
1993-Q2	266.888	118.475	132.564	352.242	528.387	1318.1	1044.47	253.245	48.336	865.773	534.411	19.601	489.826	560877	298395	202.804	419.03	59.8	1797.82	2926.56
1993-Q3	270.906	119.165	128.842	370.997	527.394	1344.88	1049.97	255.134	48.379	862.51	538.142	19.975	487.577	566973	314989	204.656	415.253	60.88	1772.63	2940.15
1993-Q4	275.987	121.389	128.992	375.595	522.22	1393.3	1064.6	258.721	47.469	849.383	541.04	20.763	503.421	573697	323171	210.56	429.244	62.054	1720.94	2969.17
1994-Q1	282.058	120.773	129.693	378.255	527.889	1412.57	1080.51	257.662	47.126	843.149	542.454	20.954	492.262	566375	340526	216.954	430.62	65.607	1699.17	2974.13
1994-Q2	289.939	123.372	131.98	390.185	530.881	1439.61	1081.78	258.414	46.489	841.107	543.563	21.781	496.328	559870	364523	220.69	436.927	65.782	1684.72	3039.59
1994-Q3	294.849	124.245	129.21	394.472	533.579	1469.61	1069.15	260.342	46.062	837.449	549.404	22.176	491.687	566281	386387	222.958	439.572	67.4	1670.51	3110.58
1994-Q4	303.712	126.966	132.313	406.478	534.904	1498.26	1068.47	267.125	45.595	844.013	556.341	22.904	508.975	574867	399128	227.418	449.354	70.107	1654.87	3192.12
1995-Q1	308.712	125.756	128.652	412.824	537.007	1488.55	1076.8	269.021	45.262	842.693	566.914	23.506	511.258	571448	417043	234.053	483.655	71.492	1670.59	3258.54
1995-Q2	315.934	128.427	132.928	419.316	540.786	1512.66	1088.04	275.122	45.237	851.289	573.996	24.654	518.121	564845	438360	242.11	494.767	74.069	1650.22	3341.47
1995-Q3	328.755	130.219	131.137	425.126	541.485	1534.5	1091.4	277.494	45.135	848.329	582.862	25.386	510.501	576308	460550	245.941	502.99	76.164	1669.69	3397.62
1995-Q4	338.583	134.449	131.549	439.427	549.17	1572.21	1110.02	284.398	43.853	849.416	592.825	26.386	525.431	584513	482107	251.309	519.523	80.185	1657.89	3438.36
1996-Q1	346.285	133.249	132.441	449.217	558.318	1593.05	1131.91	284.796	43.965	847.317	603.876	27.389	518.434	581589	503639	259.371	531.875	82.374	1600.47	3457.55
1996-Q2	353.858	135.712	136.781	452.212	562.243	1614.92	1144.31	294.68	44.112	850.683	614.887	28.736	525.54	578758	530446	267.063	551.691	86.105	1611.15	3523.73
1996-Q3	362.262	137.425	137.397	458.139	559.638	1637.27	1161.31	297.039	44.138	849.439	624.313	29.819	520.404	580230	559916	273.112	566.131	86.497	1624.77	3598.69
1996-Q4	373.169	142.031	139.254	465.094	562.615	1691.17	1172.08	306.041	44.091	846.546	634.753	31.069	534.006	591377	573982	280.452	583.124	89.107	1653.64	3636.66
1997-Q1	376.23	142.703	140.906	479.918	568.21	1709.81	1192.75	314.549	43.263	847.249	642.19	32.374	532.428	582138	604605	292.951	600.974	91.149	1651.2	3684
1997-Q2	386.629	145.91	145.137	490.715	569.503	1738.26	1215.83	324.612	43.478	855.207	653.033	35.516	547.453	578630	633429	302.154	636.3	93.479	1665.87	3768.61
1997-Q3	397.735	148.085	145.237	512.04	567.915	1758.11	1239.17	333.992	44.702	878.773	685.966	37.088	544.214	578706	660560	309.542	661.878	96.224	1677.24	3812.04
1997-Q4	412.956	151.15	146.944	518.558	569.263	1796.1	1258.44	347.671	44.577	887.559	693.549	39.638	568.265	594363	697531	301.627	684.308	99.128	1700	3873.85
1998-Q1	421.044	152.345	147.31	528.625	571.514	1826.19	1291.56	356.272	45.925	902.158	706	42.089	566.891	578953	709509	320.068	708.079	99.149	1720.52	3912.03
1998-Q2	430.219	155.203	151.783	540.35	576.799	1852.86	1327.57	376.643	47.151	908.578	721.931	44.584	575.674	589135	706098	330.762	732.257	100.78	1768.65	3979.96
1998-Q3	440.565	157.125	151.87	552.661	573.346	1876.83	1360.46	386.148	48.682	912.17	735.344	46.613	570.495	590283	713647	345.456	742.432	102.157	1778.65	4054.76
1998-Q4	455.701	160.611	153.4	553.414	573.553	1933.75	1373.66	403.789	50.849	910.855	745.536	48.924	592.63	600143	702295	355.724	742	104.911	1789.42	4162.45
1999-Q1	464.391	160.717	160.182	557.027	588.156	1961.39	1401.97	410.912	52.223	915.639	757.722	52.071	600.569	582959	729390	367.46	755.265	106.082	1835.23	4192.44
1999-Q2	477.681	161.907	161.784	554.384	597.842	1987.53	1428.56	440.834	53.92	948.077	779.877	58.803	620.527	580236	701286	384.228	780.007	108.236	1860.16	4253.28
1999-Q3	487.341	165.91	164.876	556.281	605.534	2012.63	1442.79	449.028	54.971	957.274	791.039	61.402	625.314	577639	700866	392.075	801.543	111.51	1873.65	4383.09
1999-Q4	508.568	173.656	167.364	573.735	608.013	2061.41	1450.41	469.229	56.106	981.415	805.353	67.55	649.546	585404	673648	403.701	819.478	114.552	1895.67	4534.02
2000-Q1	519.906	174.3	169.714	610.923	620.786	2116.46	1509.48	486.341	56.358	997.538	826.197	73.723	666.99	571830	665272	422.448	847.889	116.455	1928.34	4661.13
2000-Q2	539.024	177.851	174.204	622.66	610.051	2118.66	1543.76	510.286	56.576	1020.2	850.208	75.314	686.352	565980	660296	435.071	891.627	118.402	1951.75	4822.89
2000-Q3	551	185.057	176.91	625.881	612.633	2145.78	1580.54	527.424	57.503	1048.39	866.715	79.763	704.124	568163	670678	455.81	932.195	119.056	1989.07	4930.85
2000-Q4	567.706	187.325	173.686	629.923	614.733	2167.06	1602.64	548.881	61.506	1059.25	886.127	81.425	728.043	576204	662504	463.857	943.958	123.761	2013.31	5001.67
2001-Q1	579.496	186.461	173.944	637.352	627.908	2204.18	1659.52	556.38	71.128	1080.62	903.716	84.811	739.346	573140	665445	486.258	972.165	125.098	2085.48	5025.33
2001-Q2	589.461	190.732	176.429	637.033	634.939	2191.78	1689.93	584.295	72.593	1103.19	925.448	90.007	748.616	563014	674160	490.99	999.298	129.251	2079.28	5066.04
2001-Q3	599.169	192.453	173.537	651.418	631.321	2189.96	1713.14	598.86	73.546	1128.54	940.153	91.54	753.905	558653	696940	497.548	1021.38	131.566	2106.99	5093.84
2001-Q4	613.257	194.398	172.817	654.114	627.527	2212.61	1764.55	622.414	75.511	1118.52	957.91	94.986	776.184	563151	683823	497.803	1044.25	134.457	2220.42	5142.83
2002-Q1	626.061	194.154	175.109	661.676	629.337	2196.58	1785.2	637.943	76.224	1135.91	973.381	96.474	778.582	546357	720206	513.642	1060.75	135.635	2257.76	5112.37
2002-Q2	666.111	195.35	173.47	667.447	633.068	2195.59	1805.19	661.276	78.053	1133.21	988.499	98.329	796.171	533769	739621	525.963	1092.26	138.036	2258.28	5113.49
2002-Q3	684.44	195.889	172.596	675.831	631.644	2208.04	1836.27	678.338	80.555	1140.21	1014.35	103.545	801.061	527518	775942	524.446	1108.76	140.63	2292.33	5242.71
2002-Q4	705.251	196.206	171.506	679.418	637.104	2221.33	1848.34	698.491	82.168	1146.27	1043.33	104.64	825.76	535474	813215	519.659	1116.62	144.819	2314.34	5334.11
2003-Q1	723.887	195.202	170.388	691.793	639.782	2209.8	1895.47	719.195	83.937	1157.09	1049.65	106.801	835.936	521123	838518	536.739	1135.75	148.368	2329.7	5415.58
2003-Q2	750.839	195.9	175.604	691.8	647.483	2213.78	1926.12	752.748	87.073	1159.41	1074.82	110.868	851.35	517751	842806	542.228	1164.61	152.464	2366.74	5524.07
2003-Q3	762.805	197.62	175.048	697.373	647.463	2213.42	1947.02	769.102	88.611	1162.51	1095.33	116.89	867.982	515782	853002	545.437	1184.93	155.872	2368.4	5609.83
2003-Q4	801.056	198.198	174.931	704.566	654.696	2209.07	1978.7	800.504	90.03	1166.25	1114.07	124.274	894.864	518106	860581	551.399	1208.85	161.688	2408.52	5709.54
2004-Q1	815.409	198.931	177.06	715.34	664.866	2192.77	2028.36	828.61	92.904	1178.48	1130.8	132.619	898.869	509523	880031	559.332	1238.39	166.068	2432.75	5788.36
2004-Q2	849.196	200.122	177.838	742.081	671.363	2196.03	2077.38	869.389	96.331	1204.66	1154.31	141.304	923.514	504901	889698	568.675	1274.25	172.505	2479.11	5954.94
2004-Q3	865.286	202.22	179.911	756.973	677.373	2192.2	2105.53	895.276	97.85	1222.83	1176.15	151.638	931.506	500593	899716	582.919	1303.61	175.34	2496	6098.6
2004-Q4	897.032	204.138	182.589	779.694	678.069	2180.71	2153.44	937.027	99.7	1238.18	1197.02	162.329	963.2	507346	895522	589.703	1330.8	184.706	2557.66	6288.8
2005-Q1	912.162	205.892	184.421	789.652	692.468	2164.93	2231.46	980.446	102.954	1254.07	1215.16	171.668	979.137	502363	903459	600.479	1374.76	191.856	2607.16	6404.02
2005-Q2	947.042	223.396	189.031	811.966	700.945	2169.3	2310.18	1074.01	108.354	1287.98	1245.01	184.043	1006.5	495301	930596	615.055	1435.82	198.616	2702.7	6621.48
2005-Q3	971.25	228.452	190.972	828.395	710.507	2174.73	2377.55	1122.14	110.238	1304.85	1279.82	197.161	1013.75	510561	949246	629.352	1493.82	204.899	2778.99	6828.7
2005-Q4	1014.38	231.538	196.896	847.065	711.581	2168.32	2465.89	1194.95	112.78	1345.33	1307.55	211.315	1035.47	515860	971828	633.893	1575.9	212.283	2864.19	6956.39
2006-Q1	1045.39	233.309	201.642	862.115	726.248	2177.02	2546.82	1255.68	116.141	1381.76	1320.34	224.706	1064.48	514078	995780	642.475	1648.03	217.251	2928.96	7111.8
2006-Q2	1085.54	238.547	204.686	890.941	734.724	2191.45	2641.53	1340.03	120.242	1422.95	1354.96	239.479	1093.7	508925	1.04366e+06	656.126	1732.72	225.986	3030.29	7305.43
2006-Q3	1116.27	242.403	207.628	907.241	762.8	2197.55	2719.3	1409.08	122.528	1449.71	1395.67	252.494	1113.66	514070	1083750	658.296	1789.93	232.122	3087.64	7465.47
2006-Q4	1153.24	242.946	211.067	929.417	768.377	2186.43	2810.47	1497.39	125.66	1479.12	1422.25	266.548	1153.25	520146	1.12489e+06	656.952	1873.86	239.665	3149.44	7611.43
2007-Q1	1190.15	243.149	216.128	955.792	783.649	2175.3	2894.72	1557.3	129.47	1512.69	1445.66	275.895	1177.47	519013	1.15445e+06	670.655	1926.99	247.702	3259.84	7661.28
2007-Q2	1236.15	247.594	222.362	988.068	796.796	2178.41	2985.19	1637.46	133.378	1562.16	1467.76	288.803	1209.38	515052	1.19264e+06	676.17	2012.3	257.622	3392.53	7844.37
2007-Q3	1297.84	250.836	223.833	1035.79	807.504	2190.79	3059.06	1689.68	137.019	1596	1514.05	300.495	1236.36	516650	1226943	684.499	2065.6	264.462	3473.99	8081.36
2007-Q4	1379.42	253.477	228.658	1051.72	831.323	2205.89	3174.14	1737.09	140.302	1639.63	1547.64	310.985	1282.55	521309	1.26716e+06	697.013	2112.95	270.919	3602.09	8283.41
2008-Q1	1425.82	258.136	233.688	1060.97	836.451	2210.3	3235.9	1769.54	144.653	1679.47	1587.44	317.594	1296.7	516709	1.32121e+06	716.178	2161.65	277.015	3686.1	8419.46
2008-Q2	1477.23	261.281	226.742	1069.18	846.145	2224.52	3316.3	1808.68	149.291	1706.98	1598.49	318.634	1313.65	519805	1377655	724.015	2209.17	285.034	3811.49	8453.52
2008-Q3	1520.16	265.327	229.935	1095	859.659	2234.34	3364.19	1826.05	153.25	1735.62	1586.93	324.257	1327.67	514058	1433399	740.795	2186.9	289.865	3885.81	8499.88
2008-Q4	1551.47	270.445	213.43	1093.46	857.808	2249.56	3411.01	1840.01	154.369	1757.73	1548.24	310.702	1340.94	525366	1.45696e+06	712.547	2200.02	293.679	3968.32	8537.67
2009-Q1	1573.42	268.715	208.291	1083.69	867.254	2239.92	3412.08	1827.95	154.818	1759.82	1547.13	311.466	1338.15	519427	1.49032e+06	710.555	2162.74	296.083	4021.83	8375.65
2009-Q2	1598.25	268.289	207.175	1096.15	877.465	2231.77	3415.2	1822.87	155.164	1740.17	1620.64	307.035	1348.79	521389	1.50023e+06	715.491	2119.24	296.791	4067.06	8199.53
2009-Q3	1624.31	269.634	205.047	1108.61	882.474	2226.35	3405.4	1803.16	154.959	1745.35	1603.9	297.83	1342.92	519217	1.52204e+06	718.647	2060.94	297.746	4064.75	7964.42
2009-Q4	1649.14	269.755	196.905	1123.76	889.599	2209.56	3436.12	1795.67	155.456	1759.33	1608.35	286.441	1348.54	521567	1532429	728.341	2034.03	296.238	4088.22	7796.23
2010-Q1	1671.14	272.051	199.639	1132.65	901.894	2200.38	3447.79	1783.69	157.461	1772.96	1762	276.683	1355.23	525479	1.55309e+06	741.793	1960.05	297.681	4145.29	8041.95
2010-Q2	1695.71	276.855	200.662	1158.09	892.511	2211.32	3468.74	1797.84	160.757	1786.02	1747.21	259.337	1437.19	515654	1.5835e+06	746.211	1977.48	297.459	4213.08	7942.78
2010-Q3	1707.64	277.9	199.774	1165.27	897.051	2207.42	3462.95	1783.13	162.728	1800.78	1713.36	246.628	1450.25	516932	1.60243e+06	764.82	2010.38	298.09	4344.18	7911.71
2010-Q4	1728.54	280.922	200.513	1179.4	907.535	2211.11	3461.07	1778.44	163.803	1827.7	1686.11	222.836	1463.7	518557	1.59865e+06	784.571	2006.24	299.412	4376.87	7845.91
2011-Q1	1759.41	279.19	204.056	1223.35	915.096	2215.74	3447.23	1756.02	166.241	1848.31	1673.11	220.513	1498.93	513805	1.62015e+06	823.577	1997.79	300.004	4441.85	7686.1
2011-Q2	1759.09	284.202	211.721	1253.79	930.378	2220.17	3434.32	1742.63	169.81	1891.03	1668.94	218.364	1517.52	508788	1.64378e+06	831.922	2014.81	300.477	4536.51	7672.65
2011-Q3	1788.14	286.927	211.724	1274.59	937.293	2236.65	3435.9	1719	173.091	1907.2	1664.12	217.399	1527.53	511006	1.69218e+06	827.277	2035.9	301.366	4596.12	7736.76
2011-Q4	1813.85	287.586	203.076	1549.07	941.957	2238.37	3431.57	1704.05	175.401	1916.93	1651	198.524	1515.83	512648	1.69643e+06	808.151	2033.27	302.33	4631.12	7840.61
2012-Q1	1836.85	288.339	205.762	1566.27	954.051	2245.68	3443.83	1679.37	177.51	1929.41	1647.03	196.197	1503.3	517081	1.70851e+06	808.536	2004.68	305.519	4671.26	7771.13
2012-Q2	1872.17	290.069	208.944	1593.64	962.577	2252.11	3459.48	1661.49	180.925	1943.6	1647.04	194.529	1501.85	509459	1.73057e+06	829.479	2030.44	308.268	4727.67	7859.28
2012-Q3	1883.1	291.657	203.813	1629.43	973.012	2260.99	3438.04	1631.23	182.501	1936.1	1646.03	192.251	1483.53	513473	1.74059e+06	834.611	2022.5	311.062	4754.81	7910.1
2012-Q4	1898.83	289.859	205.513	1650.13	991.72	2257.03	3424.33	1538.79	182.824	1941.67	1634.73	195.309	1478.54	523008	1.72942e+06	825.721	2025.4	314.422	4779.47	8037.75
2013-Q1	1915.67	289.047	207.429	1670.76	999.513	2259.85	3426.69	1485.9	184.429	1946.45	1630.32	193.58	1465.33	527091	1.73093e+06	838.16	2037.93	318.217	4839.14	7952.47
2013-Q2	1944.82	288.801	212.026	1695.72	1004.24	2261.8	3427.7	1459.19	185.392	1947.67	1616.84	190.713	1449.97	526529	1.75857e+06	831.651	2076.34	322.032	4874.35	8007.44
2013-Q3	1967.93	290.565	212.762	1729.41	1011.52	2265.05	3396.24	1427.01	186.824	1955.2	1621.08	191.379	1436.51	534557	1.77469e+06	816.975	2091.64	325.623	4907.87	8066.74
2013-Q4	1999.54	289.256	217.136	1749.06	1030.6	2266.15	3437.42	1393	187.591	1961.06	1627.32	187.215	1420.12	544333	1.77714e+06	813.665	2114.98	329.089	4946.52	8175.86
2014-Q1	2026.14	289.303	217.794	1759.81	1038.06	2266.96	3457.79	1362.97	186.392	1970.24	1619.28	183.402	1435.19	537479	1.79803e+06	809.232	2134.42	331.505	4988.58	8198.11
2014-Q2	2065.63	290.729	224.006	1783.6	1049.46	2280.55	3459.71	1346.98	188.46	1940.08	1626.87	170.939	1429.53	538369	1.82006e+06	799.489	2198.38	336.095	5075.76	8361.48
2014-Q3	2092.51	293.483	227.328	1808.09	1055.35	2288.5	3471.34	1315.59	189.912	1944.81	1637.5	161.929	1424.08	545454	1.8563e+06	795.33	2213.98	339.504	5124.74	8452.3
2014-Q4	2129.97	283.579	235.693	1828.44	1058.63	2278.84	3478.99	1292.68	190.284	1958.39	1639.46	157.197	1407.18	551572	1.88278e+06	785.53	2266.65	343.435	5160.76	8609.37
2015-Q1	2161.56	287.197	243.315	1847.55	1061.82	2291.41	3492.66	1279.84	192.157	1980.4	1645.7	149.802	1411.8	553281	1.91511e+06	794.12	2318.18	349.918	5234.09	8671.45
2015-Q2	2204.92	286.651	247.944	1872.7	1063.73	2303.74	3458.82	1265.36	194.359	2002.53	1646.24	146.549	1422.31	548689	1.93815e+06	785.327	2372.92	355.603	5306.9	8839.13
2015-Q3	2251.51	288.786	251.187	1905.63	1072.14	2318.32	3459.79	1244.97	195.793	2023.09	1656.33	142.873	1415.42	549978	1.97973e+06	775.101	2401.5	362.313	5372.18	8976.23
2015-Q4	2292.12	288.732	254.704	1937.41	1064.45	2329.71	3459.28	1236.38	197.125	2032.37	1677.42	139.051	1416.09	560759	2.00869e+06	773.311	2404.41	368.856	5428.13	9181.13
2016-Q1	2328.86	289.411	257.895	1949.21	1075.87	2348.02	3493.47	1218.77	198.819	2056.42	1692.74	135.243	1410.41	560184	2.0369e+06	795.308	2418.69	375.496	5491.72	9270.63
2016-Q2	2370.83	290.155	260.761	1995.05	1086.2	2362.12	3522.76	1221.63	201.19	2073.8	1713.56	134.08	1416.97	554645	2086270	777.42	2452.09	383.69	5630.04	9453.98
2016-Q3	2399.38	292.138	263.654	2007.74	1093.68	2382.11	3545.99	1201.89	202.669	2082.2	1738.77	134.224	1410.44	564942	2.13171e+06	778.033	2471.14	391.311	5699.57	9548.53
2016-Q4	2443.08	292.576	271.906	2030.2	1097.39	2393.56	3543.1	1198.62	203.457	2106.99	1750.55	130.618	1404.1	575395	2.16477e+06	814.504	2484.89	397.759	5732.02	9655.98
2017-Q1	2462	293.745	276.346	2053.12	1103.2	2414.56	3568.36	1192.94	206.073	2147.77	1773.08	130.461	1409.63	579544	2.19197e+06	824.331	2518.61	402.862	5867.05	9654.38
2017-Q2	2500.94	295.785	276.639	2101.17	1109.18	2439.47	3581.43	1191.45	208.087	2169.11	1797.76	133.291	1395	578870	2.22968e+06	820.572	2564.26	408.372	5955.13	9806.67
2017-Q3	2520.62	299.511	278.107	2135.22	1116.7	2464.86	3599.81	1177.2	209.781	2187.31	1783.88	133.114	1362.57	588668	2.27745e+06	833.717	2605.16	413.545	6038.08	9900.69
2017-Q4	2547.18	303.927	286.05	2161.49	1125.49	2483.66	3603.62	1176.56	209.953	2224.61	1791.44	131.189	1361.08	597532	2.3017e+06	820.728	2629.2	418.565	6104.23	10072.6
2018-Q1	2573.3	306.288	292.39	2179.64	1139.66	2514.82	3629.57	1159.06	211.753	2251.6	1793.2	131.19	1369.39	597249	2.34266e+06	824.932	2706.41	422.837	6221.08	10085
2018-Q2	2601.02	309.908	303.619	2221.78	1153.59	2541.05	3658.46	1166.95	215.05	2287.16	1850.42	131.09	1338.11	595657	2.38738e+06	813.929	2759.95	430.068	6352.82	10240.1
2018-Q3	2627.18	314.777	306.31	2248.95	1161.7	2572.98	3668.85	1152.76	217.022	2315.12	1861.49	133.008	1328.54	603626	2413175	822.436	2797.18	434.444	6416.03	10333.1
2018-Q4	2652.18	319.201	307.572	2285.83	1168.91	2590.82	3680.76	1147.26	218.305	2351.78	1870.91	132.411	1310.78	601703	2.45337e+06	820.564	2833.58	440.02	6439.95	10541.7
2019-Q1	2667.29	323.362	308.452	2299.92	1180.72	2626.7	3731.57	1143.45	220.283	2393.57	1882.31	130.136	1298.98	606460	2.49579e+06	827.254	2882.44	446.338	6542	10569.3
2019-Q2	2676.88	327.921	317.306	2347.77	1192.57	2669.5	3753.67	1152.62	222.575	2418.52	1899.15	131.089	1296.85	605788	2.55735e+06	821.746	2814.9	452.777	6646.12	10726.8
2019-Q3	2710.27	332.958	321.29	2384.76	1202.11	2695.04	3775.83	1135.06	225.166	2457.67	1916.51	132.234	1287.34	609703	2.61331e+06	824.077	2868.25	458.399	6686.63	10806.4
2019-Q4	2731.94	335.388	327.731	2406.63	1209.76	2717.3	3770.92	1131.68	227.127	2474.72	1923	130.765	1270.63	620898	2.66067e+06	819.244	2882.9	464.962	6727.5	10928.4
2020-Q1	2778.15	339.505	339.403	2476.81	1224.49	2760.06	3767.55	1136.52	230.959	2529.1	1954.49	125.91	1288.68	620023	2.74082e+06	831.058	2920.44	471.302	6900.72	11375.9
2020-Q2	2773.5	342.995	342.696	2452.16	1231.92	2795.64	3783.15	1174.7	234.435	2608.01	1964.81	126.199	1303.33	646702	2.81597e+06	825.962	2929.1	469.923	7004.68	11487
2020-Q3	2765.52	346.788	342.8	2469.41	1240.35	2817.14	3822.43	1160.14	236.293	2646.35	1974.82	125.514	1323.3	651746	2.87647e+06	824.815	2950.45	469.568	7022.34	11316.5
2020-Q4	2782.39	347.989	346.31	2505.76	1251.2	2839.04	3857.44	1160.05	236.813	2689.6	1990.28	123.414	1318.48	659073	2.93457e+06	819.637	2971.87	477.91	7052.89	11200.2

## Sheet: HOT_INFLOWS
	AU	AT	BL	CA	CH	DE	DK	ES	FI	FR	GB	IL	IT	JP	KR	NL	NO	NZ	SE	US
1980-01-01	0.221	2.274	17.888	5.3345	#N/A	7.6	-0.187	0.5937	0.6815	5.4	27.1	0.6621	1.4062	12.07	1.9389	4.1163	0.9621	-0.173	0.4862	7.8
1980-04-01	0.898	1.121	10.743	4.2108	#N/A	5.4	0.0252	2.1576	1.1514	7.3	15.8	0.847	0.6308	10.2	1.4708	2.2332	0.0366	0.089	0.1106	5.1
1980-07-01	0.952	2.604	9.942	3.1436	#N/A	5.5	0.0399	1.2468	0.7051	6.6	9.2	0.441	0.6497	13.88	2.6477	3.8647	0.3309	0.378	-0.0193	10
1980-10-01	1.103	1.968	10.041	4.9013	#N/A	12.4	0.0598	0.9228	0.7226	22.8	31.1	0.973	18.6411	8.73	1.2387	5.4932	0.6368	0.13	0.5302	23.4
1981-01-01	0.96	0.662	14.169	6.1324	#N/A	15.3	0.7695	1.485	0.057	3.7	24.1	-0.0107	-1.8416	16.67	1.4008	2.9162	-0.2267	0.127	1.6305	7.1
1981-04-01	1.369	2.874	5.975	12.5375	#N/A	4.8	0.7597	2.1779	0.7349	1.6	11.5	0.9335	8.1295	1.03	1.2773	1.3497	-0.108	0.198	-0.4367	9.2
1981-07-01	0.735	0.646	1.775	6.7585	#N/A	5.3	0.3737	0.7911	0.5078	3	23.5	0.3168	1.9224	13.76	0.693	1.8165	-0.0077	0.387	0.4602	11.9
1981-10-01	2.612	0.831	-0.897	8.5002	#N/A	3.4	0.821	0.9771	0.682	17	23.6	1.5644	17.4307	5.99	1.8858	0.8511	-0.132	0.886	0.8169	31.7
1982-01-01	1.88	0.656	8.471	6.1104	#N/A	2.8	1.2044	0.7281	0.2514	-0.8	18.3	-0.4218	-5.1211	12.54	0.3126	3.2036	0.2482	-0.056	-0.7301	25.7
1982-04-01	3.695	1.074	3.736	2.7272	#N/A	3.5	0.8649	1.4412	0.5616	3.4	0.5	1.6211	1.1614	-9.26	1.0792	-1.0331	-0.2776	0.616	0.1141	31.8
1982-07-01	3.222	-0.437	9.095	-0.8169	#N/A	3.1	0.9138	0.369	0.873	4.4	27.3	0.4616	0.541	9.2	0.753	-1.2683	1.121	1.054	0.802	15.1
1982-10-01	2.957	1.761	9.212	-1.4971	#N/A	3.2	0.6527	0.7557	1.7614	14.8	-0.4	2.1863	8.0141	-0.2	3.0251	1.5579	0.8269	0.731	1.1165	11.2
1983-01-01	1.695	-0.849	3.016	2.5655	#N/A	0.4	0.7173	0.6235	0.0416	-1.8	12	-0.264	-6.6294	12.54	0.1769	-1.6739	-0.9893	0.537	-0.6188	14.2
1983-04-01	1.046	2.548	2.074	3.7668	#N/A	2.1	1.3001	0.6441	0.5945	2.7	-1.6	1.6189	6.7668	-3.37	0.7931	0.3448	0.1516	-0.223	-0.3162	12.5
1983-07-01	1.166	1.124	16.019	2.72	#N/A	1.8	1.1575	0.9623	0.1059	4.5	16	-0.2706	-0.0711	11.5	1.2208	1.8421	-0.4565	0.324	-0.0836	15.9
1983-10-01	2.081	1.933	-12.284	1.2391	#N/A	4	1.5553	0.7899	1.4889	10.7	6.5	1.45	14.4147	1.64	1.3148	-1.0854	0.1919	0.732	-0.5083	34.6
1984-01-01	2.076	0.112	12.502	5.6521	#N/A	4	0.061	1.404	-0.4099	-1.3	16.4	-0.8489	-4.8064	13.22	0.0154	2.0078	-0.3196	0.209	-0.2509	17.6
1984-04-01	2.175	1.276	12.648	4.6485	#N/A	2.6	1.5243	1.5025	2.2202	4.3	13.5	1.7624	3.0112	-0.93	1.1158	-1.9139	0.269	0.826	-2.4416	33.4
1984-07-01	2.288	2.171	5.757	0.7603	#N/A	4	1.8522	0.6508	0.7498	3.2	-2.8	-0.3172	-0.0906	11.4	0.4239	-0.1239	0.9174	0.407	-0.3403	2.3
1984-10-01	2.741	2.02	4.677	-0.0233	#N/A	5.7	1.022	0.6323	1.8576	10.7	6.1	0.3638	15.0992	5.67	0.7977	1.129	1.191	0.561	-0.6364	38
1985-01-01	2.946	1.066	24.871	7.0288	#N/A	1	1.2431	0.1533	1.0395	2.8	12.7	-0.8852	0.8119	1.6	0.9939	4.0224	0.5556	-0.015	-1.0465	12.5
1985-04-01	1.723	0.147	4.906	-2.1036	#N/A	3.4	1.9953	-0.9448	1.1294	2	7.5	0.4645	5.9522	2.13	1.054	-1.2429	1.2542	0.1	-1.4375	24.2
1985-07-01	2.783	0.345	9.196	4.2026	#N/A	3.2	0.9458	-0.7772	-0.437	-2	12.4	-0.626	-6.5319	5.21	1.0513	0.9123	1.4335	0.076	1.081	32.9
1985-10-01	2.593	1.957	17.607	3.8671	#N/A	12.8	4.7753	-1.7161	0.3041	8.6	23	0.8389	7.3528	2.37	1.0818	3.1009	0.616	0.251	0.1895	53.8
1986-01-01	5.038	-1.033	16.058	9.9499	#N/A	10.2	0.7833	-0.8874	0.259	-0.8	19	-0.3659	-6.6166	9.57	-0.1165	3.104	0.5844	-0.334	1.4106	37.5
1986-04-01	1.708	1.362	-3.907	1.1739	#N/A	5.4	3.5678	-2.0457	-0.2321	6	18.1	0.4078	6.562	10.43	-0.2618	4.8557	2.4783	0.8	-0.0556	47.8
1986-07-01	2.385	1.097	23.167	2.0552	#N/A	11.7	0.6049	-0.1538	0.9365	0.8	65.3	0.1169	-5.1678	12.6	-0.723	1.7373	2.1187	1.563	1.1137	61.7
1986-10-01	2.641	2.56	30.69	9.639	#N/A	8.7	-0.1544	-0.8366	0.3204	9.9	18.6	0.6809	12.8178	14.56	-1.1767	3.8741	1.1211	2.053	1.6983	45.9
1987-01-01	3.546	-0.733	33.19	5.0301	#N/A	13.7	2.8821	0.1341	2.5645	12.1	25.5	0.1669	1.6812	26.17	-2.2877	6.3864	0.9374	1.452	2.5621	28.8
1987-04-01	3.031	2.349	20.946	0.6114	#N/A	9.4	4.6571	2.0676	2.0935	15.3	42.1	0.1355	4.7941	26.64	-2.3282	6.3408	3.6959	0.262	1.6092	48.4
1987-07-01	3.586	1.582	37.1	4.8601	#N/A	3	2.0796	4.6325	2.2952	9.1	38.1	0.4106	-4.223	9.57	-2.5591	2.4801	3	-0.244	1.3015	62
1987-10-01	2.516	-0.96	35.518	7.7499	#N/A	-4.3	0.94	2.7477	0.4098	18.8	22.5	-0.0387	6.5176	11.14	-3.0042	5.5356	0.5318	-0.364	2.0398	49.4
1988-01-01	3.729	3.933	1.669	2.1753	#N/A	2.2	2.3804	2.7227	1.5969	2.9	12.6	0.2227	7.7676	7.97	0.1645	3.7246	2.3712	0.5	2.4167	23.1
1988-04-01	4.976	1.225	-3.932	5.6639	#N/A	2.8	4.1965	4.7071	4.5176	11.8	37.8	0.1027	15.1203	20.06	-0.3865	9.1911	3.1921	-0.994	1.9789	60.4
1988-07-01	4.882	1.082	17.154	3.841	#N/A	11.2	2.499	-0.5326	1.0288	13	37.6	-2.5005	-0.0548	27.95	-0.0624	7.866	-0.1161	-1.165	2.5512	38.5
1988-10-01	3.849	-1.831	-13.171	7.2201	#N/A	2.8	2.5641	2.664	-0.7468	9.3	20.8	-3.2676	8.0074	13.77	-3.014	1.9107	-0.1201	0.082	4.5672	65
1989-01-01	3.9694	3.605	29.223	13.5582	#N/A	5.8	0.4221	2.9104	3.74	39.1	59.2	0.9354	15.9032	5.59	-0.5938	12.8573	1.3561	-0.804	2.7286	47.4
1989-04-01	3.6308	3.287	14.176	-0.6551	#N/A	23.2	1.6459	5.3393	2.6942	20	23	0.1802	16.3346	26.55	-0.054	3.3081	1.2151	1.107	5.5155	-4.8
1989-07-01	5.0501	0.268	10.334	6.7786	#N/A	12.9	1.2147	1.6732	2.4531	9.3	38.8	-0.7933	6.9774	34.17	0.2649	11.0593	0.6037	0.31	8.8648	62
1989-10-01	5.1472	-2.348	13.019	9.8267	#N/A	24.5	1.0894	1.738	-1.161	20.5	26.4	0.0512	16.181	41.67	-1.1444	0.3055	-0.4549	0.676	10.7607	49.8
1990-01-01	5.361	6.605	25.426	2.719	#N/A	10	4.0204	3.8819	9.6535	40.2	31.5	0.0453	14.4787	-4.18	0.3182	18.7406	2.7164	0.615	9.1609	-39.3
1990-04-01	0.4032	1.51	6.83	9.6536	#N/A	3.9	-0.6088	7.465	3.2898	16.2	6.7	0.6477	24.6862	10.35	1.4293	4.3446	-0.1099	0.903	16.4011	27.1
1990-07-01	3.396	-0.166	15.929	8.6692	#N/A	16.8	4.6849	4.9062	1.9376	44.5	55.2	0.2141	10.9567	23.78	4.7343	7.1345	1.5961	0.191	7.5196	54.3
1990-10-01	2.0353	-3.88	22.296	4.7428	#N/A	23.8	3.2835	10.7933	-0.757	15.5	44.5	0.7347	26.4931	25.85	-0.5275	-3.21	-2.037	0.052	12.1047	48.8
1991-01-01	3.5362	6.82	15.273	6.881	#N/A	22.9	3.4466	14.2854	6.8231	7.2	14	0.5658	31.4013	-20.32	2.6797	8.7805	1.7229	0.376	1.7154	3.5
1991-04-01	2.4741	0.307	20.875	3.222	#N/A	8.7	2.5948	8.4383	2.104	-1.3	-17.6	0.43	10.0091	-9.67	3.7483	-1.9016	-1.0557	-0.137	2.514	-1.4
1991-07-01	2.1961	-0.776	-9.949	7.9051	#N/A	13.2	-2.6802	1.9545	-0.8249	7.7	13.6	0.1556	10.497	14.56	2.8255	1.1939	-1.5904	-0.287	-4.3788	34
1991-10-01	4.1554	-0.95	19.147	9.4393	#N/A	22.3	1.6247	9.4626	-0.4954	7.7	26.8	0.2282	17.4644	34.59	0.6506	4.7463	-1.5831	-0.794	2.9836	49
1992-01-01	0.244	5.755	19.959	3.4821	#N/A	11.2	2.6812	15.2997	1.3451	22	-8.5	0.5649	21.8982	-39.06	3.8862	3.7263	0.276611	0.29	2.1844	28.1
1992-04-01	2.4577	4.025	23.365	10.5192	#N/A	9.3	1.8746	10.7007	0.9701	5.4	21.8	0.3123	26.9293	-58.65	1.042	5.2885	0.276611	-0.159	6.2146	43.8
1992-07-01	2.2158	5.695	41.852	2.5709	#N/A	63.3	-8.2028	7.4135	2.2189	28.7	62.9	0.4669	13.3757	6.47	2.1781	27.2644	0.276611	-0.161	4.8317	32
1992-10-01	2.5195	-2.877	19.946	2.2153	#N/A	38.9	3.4365	4.6425	1.2904	25	36.3	0.5226	-3.0843	-4.44	3.6917	-15.8336	0.276611	-0.155	-2.6473	44.6
1993-01-01	-0.0866001	4.45	31.994	14.2212	#N/A	57.5	-1.1416	14.7033	2.8159	5.7	41.7	0.3618	2.1538	-33.38	3.4644	0.5171	-0.497772	-0.154	0.2677	16.5
1993-04-01	3.0257	1.304	13.505	4.1141	#N/A	46.2	-2.8892	34.9655	1.6554	-17.4	61.9	-0.1027	14.4602	-57.24	0.6017	-0.9878	-0.497772	0.399	6.1841	47.3
1993-07-01	4.5067	2.683	31.708	9.8762	#N/A	33.2	7.9325	11.2046	-0.4764	37.8	37.3	0.3318	1.1013	38.41	2.3937	15.8539	-0.497772	0.406	3.0002	73.2
1993-10-01	4.5186	2.624	13.586	6.7864	#N/A	51.6	4.0236	13.4981	-0.647	1.9	94.2	0.2687	23.5701	13.4	3.1729	0.6491	-0.497772	0.407	-1.2324	91.5
1994-01-01	3.5009	3.754	13.835	10.7026	#N/A	13	-6.9752	-9.1856	1.8309	9	-19.1	0.369	24.3192	-9.54	3.6781	14.5117	-0.1607	0.42	-2.1611	83.6
1994-04-01	3.2633	2.97	-2.232	13.9566	#N/A	3.1	-7.3032	-4.1687	1.2213	-23	-3.9	0.8685	-11.0208	13.6	5.0227	-14.6884	-1.5075	0.203	5.9279	50.5
1994-07-01	3.0414	1	4.433	3.7432	#N/A	24.1	-4.7114	-1.5248	2.7156	10.4	31.7	0.5292	-5.6787	29.65	5.8563	6.0462	0.0191	0.209	2.8778	67.5
1994-10-01	3.6552	2.83	-3.667	4.9238	#N/A	49.3	1.5382	6.3867	1.0197	21.4	27.5	0.4095	16.531	25.22	7.7881	-2.716	-1.431	0.217	5.7089	55.4
1995-01-01	3.3618	7.454	26.227	9.1534	#N/A	33.5	-4.918	2.3579	0.9313	34.6	59	1.3371	6.7305	-3.84	9.1137	11.0782	2.6959	0.224	2.2384	86.9
1995-04-01	5.194	5.391	-0.995	2.3243	#N/A	54.2	0.7992	4.318	-2.6327	3.7	6.9	1.0318	2.1377	43.2	8.7472	6.164	-0.7254	0.438	5.7628	109.5
1995-07-01	4.1797	1.326	7.439	0.3371	#N/A	35.4	0.7511	7.7064	-0.6896	1.4	68.3	1.3949	2.4514	69.59	11.0055	11.7461	1.0748	0.434	5.5093	98.7
1995-10-01	2.5514	5.897	6.405	2.8761	#N/A	30	4.2658	13.4404	0.5772	-8.7	31	1.5321	21.3558	48.15	7.2025	-13.477	-0.5502	0.428	1.6898	82.2
1996-01-01	5.3306	3.375	33.043	6.1536	#N/A	33.6	4.1233	5.6815	1.1072	13	65.8	1.6721	15.2517	-7.9	10.7038	28.2645	4.3158	0.439	13.2214	55.8
1996-04-01	8.2066	1.141	-2.491	7.1037	#N/A	34.6	2.2735	1.5124	0.4628	0.0999999	80	0.4403	25.1732	40.1	13.3143	9.6436	2.2667	0.251	-2.6665	84.4
1996-07-01	6.4244	5.125	18.007	2.2164	#N/A	19.1	2.8191	6.2233	0.9338	12.6	59	1.48	10.7746	2.5	8.0368	12.5175	-0.9623	0.255	4.897	128
1996-10-01	5.6678	1.005	-2.98	15.6062	#N/A	54.3	6.0907	7.561	0.7482	-20.8	115.1	1.9825	39.7372	63.1	14.0303	-16.3862	5.467	0.261	-3.4711	193.2
1997-01-01	9.2894	3.406	38.461	18.1585	#N/A	78.9	6.9437	4.355	6.8098	5	137.2	2.0118	19.0434	7.2	7.4502	32.8572	7.8061	0.257	2.6215	143.7
1997-04-01	-1.6319	13.329	32.436	5.8436	#N/A	61.2	2.3556	6.3385	1.0473	10.3	96.2	1.618	27.9347	66.4	10.6041	-0.0642999	-1.0263	0.615	1.6218	117.1
1997-07-01	7.1709	2.723	13.58	1.6401	#N/A	26.5	9.9286	14.3234	2.4585	33.1	48	2.8047	30.1828	12.8	3.919	18.8686	3.7336	0.577	2.5392	148.8
1997-10-01	6.7877	-2.612	9.923	13.7931	#N/A	51.1	5.1034	7.3974	-3.4009	36.6	84.4	1.1866	9.9874	60.9	-3.9313	24.1058	-2.1246	0.55	6.4685	189.4
1998-01-01	3.8788	10.289	36.426	10.0847	#N/A	78.4	6.4032	26.1544	-0.0519	51.1	67.6	2.1527	50.5216	-97.1	-0.515	38.2703	4.3171	0.515	7.6077	58.6
1998-04-01	4.403	4.686	30.006	-1.0476	#N/A	81.2	-1.4888	14.5787	2.7502	9.2	65.8	0.4415	44.2677	-40	1.5709	32.289	6.4955	-0.00500001	8.4563	134.2
1998-07-01	2.8875	3.996	15.643	2.2018	#N/A	60.4	3.4333	23.6623	0.2191	30	33.2	0.7287	11.9212	16.9	-5.8581	21.0653	1.3266	-1.116	9.1108	51.7
1998-10-01	7.6503	0.141	0.013	11.8682	#N/A	107	-2.9366	-2.8144	6.2404	-23.9	-20.8	1.0104	14.7122	82.9	-2.1912	18.0896	-0.1651	0.342	3.2646	-2.7
1999-01-01	9.9906	15.373	61.264	-9.9472	33.5572	77.6	12.7188	33.23	1.641	99.1	150.2	3.6986	32.7231	-120.9	-0.4251	16.7401	8.1841	-0.854	0.2503	79.5
1999-04-01	4.6043	11.66	28.192	-5.0017	28.5034	70.7	8.8753	24.3777	5.1376	63.2	159.8	0.9952	33.9586	-95.5	0.0568999	28.3887	0.5745	-0.201	-4.986	106.5
1999-07-01	8.6493	16.139	56.361	3.0312	20.1178	79.7	0.3926	11.2092	5.4358	-3.2	-36.2	1.1555	25.9321	16.8	-3.0925	42.209	2.5972	0.00199999	5.5346	105.3
1999-10-01	14.8944	3.144	46.233	5.1564	32.9418	70.1	-3.2959	19.9201	2.9043	28.7	-51.8	2.8215	44.1501	61.5	2.4419	15.3436	1.6847	-0.03	2.8838	161.5
2000-01-01	4.5412	14.97	61.749	10.4867	66.1099	9.4	5.8897	21.4089	11.7635	38.2	351	4.471	37.0432	-35.7	14.561	43.6436	8.2437	-0.727	22.4211	190.7
2000-04-01	0.9479	14.569	24.874	6.6612	-33.7537	81.1	-2.3143	16.5652	3.0534	15.5	108.9	0.3701	29.252	12.1	0.9671	26.4776	4.4646	1.1731	1.6945	154.9
2000-07-01	8.5028	11.191	35.972	1.0633	42.2058	32	9.2182	43.1753	8.8478	67.5	68.1	1.6385	17.711	-4.1	-1.9698	28.6616	14.0202	-1.0018	1.7226	165.1
2000-10-01	5.3928	3.427	24.951	-6.4217	32.6745	46.7	1.5434	31.9353	7.4544	60.1	109.2	1.4207	7.1287	64.8	-2.2375	2.9809	2.2869	1.3371	14.5452	206.3
2001-01-01	7.6189	6.044	41.417	9.4949	34.8488	131.1	9.8901	26.5073	5.1469	97.9	343.1	0.1648	51.5366	3.7	-3.9533	80.9208	2.3906	0.5136	13.2456	271.6
2001-04-01	2.9747	3.589	60.019	1.4889	-18.4568	61.4	-1.4035	7.2271	0.1501	36.2	-23.7	0.2989	21.388	-6.8	-1.9109	1.7921	-0.3007	0.6294	3.5469	147.6
2001-07-01	3.1022	4.46	49.663	4.1101	-39.588	34.1	2.1654	10.2283	4.7772	-2.6	19.2	-0.5345	-12.7816	-23.7	-1.5619	22.377	3.3549	2.0377	1.1345	10.5
2001-10-01	6.1282	4.635	52.647	16.2223	18.9741	-8.1	-7.473	15.3939	5.3824	29.2	24.3	0.4329	-10.7711	69.9	1.9331	26.3882	-1.0636	1.1973	-4.1633	186.3
2002-01-01	6.9104	7.975	37.353	5.6458	27.5483	43.1	15.5657	29.5641	8.1535	35.1	26.6	-0.2685	2.9506	-101.4	1.7798	35.7836	8.2225	1.1539	6.1264	148.8
2002-04-01	11.6889	6.456	53.5342	2.2431	-0.5476	62.1	-4.0233	30.3136	0.565	12.7	35.2	0.8979	9.3719	42.8	0.1345	16.1601	4.9305	-0.2466	-2.8053	224.2
2002-07-01	3.9653	2.659	-28.4813	3.9233	-16.1073	79.3	5.0949	11.7598	4.008	-2.6	34.7	0.3704	2.0374	31	3.1528	23.8098	9.002	1.8376	-7.3517	146.5
2002-10-01	7.1542	-4.107	28.008	6.5821	34.8888	-10.6	-3.7942	16.5404	-6.9914	56	66.9	0.1489	23.6139	34	2.767	25.5448	12.2423	-1.4181	3.9408	191.5
2003-01-01	1.8725	19.807	46.5856	16.2322	-3.342	87.9	20.1403	30.769	2.905	76.8	237.5	-1.3226	49.5221	0.6	1.3375	47.7128	9.366	0.4571	11.8011	203.8
2003-04-01	19.0036	10.097	50.138	-8.6104	12.4977	46.5	9.99	24.4075	7.6696	90.1	196.2	0.2163	51.0916	57	6.0224	40.919	6.941	0.0762	16.6481	223.2
2003-07-01	8.8953	4.775	24.5894	-0.9669	-14.4981	-3.1	-9.1621	30.2999	-6.489	14.9	112.4	1.2827	2.6702	0.4	4.8087	1.5657	-0.6705	0.7305	-14.3408	130.8
2003-10-01	27.9823	-1.104	84.5296	19.8194	15.885	19.6	4.8311	32.8493	1.7003	64	81.6	0.766	3.561	57.3	5.1964	40.2471	9.7427	6.0911	3.0755	236.9
2004-01-01	19.6491	27.483	111.384	-4.4862	60.9023	134.2	3.7816	41.2122	5.1182	122.3	510.6	3.4517	32.8828	64.9	14.2226	55.8165	11.2907	3.7199	7.2634	433.5
2004-04-01	15.4953	16.273	57.7293	32.898	-3.7579	-52.9	3.7023	50.1189	14.5381	93.4	113.6	1.1726	7.789	95.9	-1.8223	25.298	23.6433	-3.3948	8.3224	299
2004-07-01	10.9508	15.719	54.2334	0.7902	-38.997	104.3	0.8074	16.9734	5.426	16.3	252.2	0.8596	10.162	30.3	2.6053	30.9994	11.4668	7.8281	-0.4296	240
2004-10-01	-5.9491	-2.634	86.0602	9.696	12.0298	26.2	2.1418	62.5183	-2.7454	128.6	135.6	1.4397	33.2258	74	1.7466	44.9633	-11.5902	0.0698	12.6462	414.8
2005-01-01	13.2708	36.4305	180.673	17.5744	12.1854	179.7	28.9699	64.4844	-0.065	104.6	507.4	2.709	95.6643	-46.1	6.0593	78.6359	18.0746	4.2392	23.6157	195.3
2005-04-01	14.3177	30.2224	144.401	8.7191	57.292	80.5	7.0817	67.5589	6.4543	123.5	301.9	-0.3889	79.2837	103	2.7752	31.1052	14.0934	-3.3371	-3.2882	313.8
2005-07-01	17.6784	9.7704	138.827	19.444	58.0944	76.5	8.8726	53.0605	-1.1483	72.3	148.9	0.489	27.6885	68.1	4.8131	102.111	16.5405	1.1128	7.563	387.4
2005-10-01	30.3488	-3.2799	137.938	-5.313	-41.4914	-0.599999	-1.2811	76.0022	10.0609	238	174.6	-0.5448	48.3223	104.2	3.1347	-15.1104	2.5587	2.02	-10.9872	238.1
2006-01-01	31.6062	41.9556	195.885	20.8081	88.1494	159.8	6.8728	128.748	9.5104	175.2	555.6	7.6976	108.335	-4.4	14.6281	169.938	28.9849	5.08	42.6774	501.3
2006-04-01	29.9043	21.9198	80.9616	40.5138	12.0555	28.9	9.8141	42.579	10.7033	63.6	111.5	-0.7827	46.404	50.2	15.924	31.5806	31.0382	-1.421	-1.3594	342
2006-07-01	30.3018	7.591	56.8611	9.707	17.0293	65.7	14.4746	48.6183	-7.5566	188.8	237.1	-0.6152	38.8316	-4.9	10.3735	91.45	28.9975	3.4976	8.534	469.9
2006-10-01	21.624	26.6193	194.87	-7.9355	-56.8037	69.2	13.504	77.1412	18.677	131.8	205.7	3.7264	53.6135	68.4	10.9888	103.854	23.7129	3.6817	0.965	508.7
2007-01-01	34.6995	29.9941	146.183	34.3807	224.227	159.6	28.8993	109.32	12.6013	259.5	825.4	1.0047	63.5595	63.9	21.572	151.278	38.2858	4.0531	68.8722	676.9
2007-04-01	42.9089	45.7531	198.947	22.9812	-22.7972	212.2	11.2799	92.1574	-3.8746	180	536.5	2.1884	103.261	34.5	23.7158	77.0919	9.0481	2.5531	-8.63	652.2
2007-07-01	-0.9487	5.2123	156.475	-9.3775	-8.5485	173	16.4344	43.8884	0.8044	16.5	376.6	1.5479	-7.3129	88.6	8.3271	-7.791	37.2276	5.0594	14.6453	183.6
2007-10-01	16.6746	-17.5803	209.145	-16.6015	99.9289	70.9	20.2725	25.3491	15.9085	139.5	276.3	1.1334	31.7998	58.5	23.3216	-38.2925	9.6663	2.4206	23.6658	330.8
2008-01-01	31.1242	29.383	104.914	28.0347	-22.7165	247.8	18.6801	38.2742	15.6984	241.6	457.2	0.6572	22.8729	91	10.8353	79.3745	1.1825	5.74	31.0341	367.7
2008-04-01	34.607	39.1162	88.9972	16.6497	-156.329	25.7	29.0854	87.5183	20.5281	80.5	-608.6	-0.2969	95.5464	-40.6	7.4162	56.185	22.8193	-2.3666	11.6152	-86.5
2008-07-01	17.807	-0.2769	65.8366	-2.0697	11.713	95	-5.1644	27.3628	-2.4337	-21.7	-51.7	0.1262	-36.2605	35.2	-2.777	44.3049	16.8345	-0.1146	17.3982	9.4
2008-10-01	-7.4206	-21.4035	-353.61	3.1438	-69.7905	-228.8	5.7811	-25.1162	-0.9123	-64.4	-816.4	-0.3559	-89.4626	-122.2	-53.1648	-194.665	10.4737	-7.1346	-24.8043	-169.3
2009-01-01	8.883	-9.6177	-63.3608	24.5772	10.9083	-71.8	11.9699	-3.2025	14.4995	-48.7	-70	-0.9566	70.8157	-89	0.082	78.5899	-33.4375	-2.0961	8.4567	-116.5
2009-04-01	34.1143	-3.9559	-26.5466	15.4369	22.3135	33.7	7.0037	9.9199	4.6975	75.3	-124.4	1.8502	27.1778	31.4	11.7502	-84.0283	-34.2517	1.2784	9.0864	-68.1
2009-07-01	34.3938	-1.2404	84.8776	42.8699	-63.8228	-53.2	-0.5393	34.8075	-0.701	137.8	-120.5	4.9457	4.2939	-21.6	24.4446	3.7621	-4.8991	4.6075	8.0386	280.5
2009-10-01	51.5198	-24.6093	35.1536	24.7798	-10.5611	-80.6	-5.5349	38.8433	43.3928	47.6	-67.4	1.7111	-53.67	-59	10.5315	-42.547	-15.2355	3.7562	5.8076	68.4
2010-01-01	16.4515	15.0253	82.0934	35.3533	2.2422	85.1	33.0162	-8.0969	-11.1503	159.3	180.1	2.4449	36.264	9.9	13.4986	91.9205	14.0676	-1.2328	18.9572	275.4
2010-04-01	18.7583	4.9533	82.7997	16.5975	31.9511	122.8	2.1599	-12.0645	44.4572	-33.4	88.1	3.5711	5.3575	106.1	9.0139	-15.9416	34.3316	3.2522	9.7119	149.9
2010-07-01	18.046	-7.6688	47.8317	28.8883	-20.6836	73.6	18.2754	-8.5905	-27.34	85.8	294	2.0347	33.6368	157.3	11.9875	87.4124	-16.0813	2.576	-3.7523	450.8
2010-10-01	35.7229	-20.0304	18.7753	44.2595	25.0821	62.3	-16.0014	2.0632	57.1447	47.6	-159.2	5.0289	40.3352	-29.4	0.0829	-65.9726	9.2546	0.5546	3.9542	250.9
2011-01-01	34.1046	30.3051	114.827	33.7365	-17.806	-9.4	3.4477	15.1122	34.1354	87.3	205.5	3.2536	46.7291	128.7	20.5996	91.8727	34.4187	1.7111	15.7802	523.7
2011-04-01	41.992	-5.762	135.92	26.4725	0.6089	30.7	-17.9049	29.5325	12.1329	133.7	48.9	4.0548	26.8054	-4.2	11.7612	56.0658	-22.0216	1.3087	9.5861	51.2
2011-07-01	38.08	10.5021	86.3529	15.596	73.528	212.7	-1.6394	9.0059	65.8897	-30	29.4	-4.4883	41.573	139.7	-0.1063	54.5699	40.7453	4.8833	18.2781	188.8
2011-10-01	-14.1291	-4.027	-101.954	48.1421	-5.6265	-127.6	-3.0433	9.4991	23.0591	-260.7	-149	-5.6854	0.1537	43.7	3.4252	-66.6029	-46.2138	-5.8505	2.6948	-43.7
2012-01-01	35.4605	7.8348	80.0502	11.8574	12.8365	292.2	18.2027	28.8315	37.9934	38.2	111	-2.6713	2.8117	73.8	15.3048	58.8979	31.4133	0.3216	29.6688	141
2012-04-01	7.6386	-0.2742	112.419	15.2314	58.0675	97.2	9.0058	43.9669	26.9789	-20.5	-217.3	-3.7777	28.2092	66.6	5.1356	-57.6486	-3.5591	2.6314	7.4631	-217.2
2012-07-01	21.7093	-4.946	5.11299	69.3589	64.6501	-20.2	-8.1151	-58.3676	4.1669	-59.5	-55.2	-1.1447	-16.4832	74.7	3.7092	-35.0219	8.8103	-2.1333	33.4347	253.5
2012-10-01	33.3424	-12.2784	150.726	48.1143	-35.6235	-143.4	-9.4688	-10.4176	-21.8732	12	-108.5	0.96	-18.9292	80.4	-9.5403	-23.5311	-18.1156	2.1396	-29.4759	204.4
2013-01-01	15.2231	2.2108	102.514	1.548	31.7191	-17.3	8.0196	1.0632	-20.303	92.9	48.8	1.4825	0.6577	30.6	8.0368	-11.3588	-0.1049	2.2813	42.6928	219.6
2013-04-01	8.8981	5.1726	147.145	1.8864	-24.3048	-19.1	-16.1073	-46.4705	-5.572	54.9	-28.5	0.6546	0.0574001	49.6	-7.0752	25.6857	26.2	-2.0703	-3.0723	147.3
2013-07-01	29.1882	-5.9814	80.3589	17.347	18.0219	-98.1	3.3533	-51.8536	-5.8645	1.9	-300	-1.8524	5.0067	92.4	6.2566	3.0747	6.6333	-2.0992	27.9267	94.3
2013-10-01	43.4909	-11.9752	9.33871	48.1624	13.246	-152.5	12.0682	-28.5139	11.386	-119.8	-25.7	0.6056	-21.9472	169	2.9034	-40.4034	19.5905	2.972	-1.1054	302.8
2014-01-01	21.4537	-0.6492	221.558	25.1039	-27.7899	46.1	-9.9381	32.9684	11.1688	192.3	89.8	1.0735	0.8163	17.9	6.5082	77.5472	8.9468	0.837	45.3328	375.5
2014-04-01	37.5601	12.5919	218.196	33.7365	-14.8849	69.7	-4.6693	36.9367	13.3945	123.9	66.1	0.1822	44.8628	116	15.2296	6.1616	-6.2648	4.1879	8.2734	217.2
2014-07-01	6.0293	-16.5602	64.5347	16.116	4.7057	24.9	-1.431	3.0064	-0.2222	-7.4	128.6	1.3723	36.3999	109	1.1604	-35.13	2.1063	2.5576	-8.6385	257.7
2014-10-01	14.2306	-13.9391	73.9923	38.4245	40.8462	-61.1	3.9289	11.8669	-15.1155	-63.6	-11.1	0.0987	5.7079	83.5	-2.6256	16.1637	46.9999	0.8627	-24.7578	7.30001
2015-01-01	39.6731	5.3728	302.886	41.9735	47.7877	218.3	38.2806	66.5663	23.3596	231.7	-111.4	-2.6239	84.2546	104	1.4689	78.1904	19.9704	2.2825	31.5886	185.6
2015-04-01	28.783	-8.7107	20.3706	34.6345	-8.4808	-102.3	-37.124	32.065	-1.4103	-56.7	-161.3	-2.7157	16.2166	-17.6	12.5915	-14.5144	3.1197	1.71	-13.9412	64.8
2015-07-01	24.2762	-4.6211	116.676	21.4309	15.1442	8.5	-6.0004	19.7407	-8.8876	-25.1	21.5	-3.1773	-0.1557	95.4	-12.4334	14.2046	36.0558	-0.5949	2.0037	-107.1
2015-10-01	29.9348	-9.1291	52.2022	58.6645	14.7031	-134.8	-17.3458	0.1709	-33.2086	-125.4	-24.6	5.7362	-20.8824	56.9	-18.3748	-21.8605	-26.1873	0.4813	-35.5434	-151.2
2016-01-01	-4.4339	9.2722	83.1963	13.6921	-51.3532	103	18.1557	16.9851	56.8135	160.1	-105.9	1.5924	48.1452	73.2	-9.7662	115.313	7.5018	3.5425	39.2133	-4.10001
2016-04-01	14.5501	-10.0377	97.5442	62.1455	48.5428	75.2	3.5366	29.6255	-8.379	101.5	202.9	-0.7143	-0.6821	82.1	6.6338	66.8767	10.7225	2.2908	6.7822	184.8
2016-07-01	2.8083	-11.7916	71.0352	38.1801	21.6993	-23.2	4.4198	0.895499	1.0452	67.3	9.5	3.9492	-11.7347	53.9	6.3497	7.6891	-7.1873	3.0206	-4.5703	113.7
2016-10-01	14.6438	-10.5759	21.4095	46.3625	5.5361	-55	-5.1777	2.9747	-45.4311	-50.2	-167	0.9831	-14.241	79.8	-7.6997	-89.4166	0.0861005	1.5449	-22.4266	-62
2017-01-01	4.0717	11.5786	155.588	49.8545	-14.1703	147	24.7746	47.0492	40.0822	220.1	137.9	1.382	70.8708	-19.3	16.1624	53.2729	13.0592	-1.4057	69.0953	313.1
2017-04-01	18.6361	3.852	115.865	27.3402	-17.9222	-40.2	-9.3169	26.9163	-20.0753	40.4	67.1	3.946	-0.442	45.7	6.0832	2.2682	-13.4949	0.8128	-21.2829	355.1
2017-07-01	9.2656	-12.0915	127.621	25.7273	-8.8916	-27.5	-4.8389	11.1881	16.9696	31.5	139.3	-0.4209	4.0007	140.7	-1.7406	-67.9405	3.426	1.6115	14.7222	400.4
2017-10-01	39.6766	-7.2962	96.7872	88.6609	-0.4127	-70.6	16.0052	37.7788	-16.4657	-37.7	176.5	-6.0218	24.1223	-15.7	-1.6627	-50.5676	5.4068	-0.2508	-29.8648	110.7
2018-01-01	29.7859	11.2374	178.736	-6.6019	8.7591	95.3	-7.5779	42.521	21.2998	257.2	151.6	2.4881	52.9643	109.9	12.0914	72.3712	9.0972	1.5036	29.0486	380.7
2018-04-01	13.0454	-0.5981	102.842	29.7392	-34.4989	47	-9.6704	9.47	11.4538	140.1	-83	-0.7469	18.4407	70	15.1457	-37.3342	1.695	3.3103	13.6319	-144.7
2018-07-01	-8.9474	2.1293	22.8751	40.3643	-38.6669	1	-2.3962	16.7771	19.9124	18.7	-55.2	2.5088	14.9235	126.5	9.3806	3.9446	4.7497	-1.9095	-8.1809	-22.9
2018-10-01	7.3345	-10.4029	-38.1696	57.5741	6.6891	-123.6	-20.5094	17.4453	-4.5234	-135	167.5	-6.7383	-36.5412	6.6	-8.169	-64.3734	8.9276	-0.0100999	-13.3143	283.7
2019-01-01	-0.7657	16.1348	133.821	21.1855	-21.847	92.6	5.0969	30.6158	56.4331	342.6	58.4	-0.2554	7.8698	118.4	8.7507	50.184	17.7491	1.9578	13.0945	40.7
2019-04-01	1.5638	9.3065	69.1479	53.872	8.9853	40.1	12.9691	30.4466	-1.0394	192.3	-51.1	0.1007	4.8769	7	21.0939	-24.2068	14.9708	-3.6607	-12.8525	217.7
2019-07-01	15.3249	-1.4955	59.4814	34.7894	14.1449	-37.2	4.6482	1.5211	9.1012	139.9	59.4	-0.0228998	32.1907	62.7	3.0001	71.2444	-11.9304	3.0417	10.4207	160.9
2019-10-01	20.872	-7.2371	0.407393	83.1923	-9.8039	-155.6	-17.4037	36.1825	-49.574	-320.3	-157.3	4.1696	2.0559	7.6	-6.617	-88.6238	16.4086	-0.0045	-32.0347	26.9
2020-01-01	21.2729	9.9757	64.423	-21.5003	59.428	226	24.8723	66.4893	50.2934	515.7	689.9	2.0585	32.2826	420.3	13.9133	132.264	18.48	3.6472	24.8192	900.2
2020-04-01	-52.6297	17.5356	92.9952	15.6577	46.7806	96.4	30.2267	45.995	-9.4766	-147.3	-301.5	4.3435	20.9544	-172.9	8.3868	33.9411	-8.685	-2.7508	-12.6161	-63.4
2020-07-01	23.0739	2.3203	66.1326	12.9694	11.6351	157.2	1.9521	2.4138	-0.9013	77.7	67.2	6.4464	-1.2098	21.9	0.9924	-11.2975	-6.3381	-4.2049	8.4024	101.5

## Sheet: HOT_OUTFLOWS
	AU	AT	BL	CA	CH	DE	DK	ES	FI	FR	GB	IL	IT	JP	KR	NL	NO	NZ	SE	US
1980-01-01	0.25	1.866	19.4	4.673	#N/A	8.7	0.0029	0.4712	0.1858	1.7	27.9	0.553	-4.1695	6.22	-0.0062	2.9058	1.0958	0.026	-0.0474	6.3
1980-04-01	0.131	-0.16	7.908	2.7019	#N/A	5.1	0.0028	0.144	0.1162	7.5	14.5	0.566	0.7998	0.15	0.0825	1.4158	0.2135	0.039	0.0589	22.4
1980-07-01	0.073	1.675	9.111	2.7623	#N/A	-0.4	0.0031	-0.0471	0.4077	4.4	10.2	-0.302	-1.4974	11.18	-0.0501	1.2839	0.4577	0.017	0.077	14.6
1980-10-01	-0.054	1.836	9.462	3.9789	#N/A	10.5	0.0029	0.2114	0.8909	20	36.3	1.05	13.786	6.34	0.1333	3.8673	0.0983	0.032	0.1302	17.5
1981-01-01	-0.312	1.192	14.458	1.0471	#N/A	5.4	0.1609	0.113	0.0591	-1.1	30.6	-0.3989	-2.0423	12.68	-0.1029	4.2924	0.7607	0.02	0.1208	16.5
1981-04-01	0.18	2.261	5.197	5.4312	#N/A	2.2	0.4499	0.1679	0.375	3.7	17.9	0.4436	4.9838	-0.42	0.0186	2.1353	-0.1961	0.053	0.2132	17.3
1981-07-01	0.337	0.729	1.49	2.9876	#N/A	2.9	0.2947	0.2103	0.6739	3.9	25.1	-0.5696	-0.6368	16.56	0.0326	1.8272	1.23	-0.068	0.0792	17
1981-10-01	-0.611	-0.57	-1.958	2.8001	#N/A	9.4	0.3253	0.308	0.6906	12.9	21.8	1.0265	14.6575	5.48	0.1381	0.0632	-0.0824	0.03	0.7027	48.2
1982-01-01	0.336	1.205	6.829	2.6057	#N/A	2.8	0.6729	0.5424	0.0749	-2.8	19.3	-0.5677	-5.2883	14	-0.0233	4.0138	1.2276	-0.024	0.1619	33.7
1982-04-01	0.00700001	0.864	3.87	2.4496	#N/A	1.8	0.0153	0.597	0.6373	1	-0.2	0.9975	-0.3456	-5	0.1364	0.2335	-0.738	0.119	0.7603	42.5
1982-07-01	0.239	0.227	8.388	-1.6745	#N/A	1	0.6054	0.633	0.5953	2.7	29.5	-0.9087	-1.443	13.96	0.1976	-0.9119	1.032	0.012	0.2581	23.4
1982-10-01	0.184	1.69	10.667	1.2971	#N/A	3.2	-0.0966	0.4591	0.9331	10.4	2.1	1.0179	8.8433	1.42	0.1815	-0.1187	0.4201	-0.031	0.5985	20.3
1983-01-01	0.383	-0.33	0.986	1.2818	#N/A	-1.9	-0.2004	0.2025	0.19	-6.4	14.6	-0.8968	-8.3226	13.77	-0.1616	-0.1671	0.0214	0.077	0.8626	27
1983-04-01	0.101	2.545	2.491	2.1888	#N/A	7.9	0.6358	-0.0216	0.4566	-0.1	-0.6	1.2689	4.419	1.63	0.0393	1.394	0.2922	-0.052	0.6426	0.9
1983-07-01	0.062	1.412	16.736	-0.0528	#N/A	0.6	0.2876	0.0027	-0.0064	2.7	15	-1.0785	0.5172	17.87	-0.0577	2.0149	0.3289	-0.009	0.2088	7.8
1983-10-01	0.09	1.647	-11.64	0.4736	#N/A	6.1	1.0646	0.2103	0.7229	11.4	9.6	1.4354	13.1258	7.16	0.1521	-1.423	0.714	0.084	0.2488	17.3
1984-01-01	1.331	0.347	11.738	4.4374	#N/A	3.8	-0.3903	0.156	-0.6245	-3.4	18	-1.2802	-5.966	15.97	0.0064	3.1227	0.1221	-0.06	0.4802	5.6
1984-04-01	-0.251	0.918	13.202	4.064	#N/A	2.8	0.9187	0.1661	0.8051	3.3	12.7	0.6613	1.9786	6.2	-0.0632	0.9814	-0.5696	-0.072	0.3166	22.9
1984-07-01	0.351	2.74	5.448	-2.0112	#N/A	6.6	0.9278	0.4371	0.2725	3.5	-1.2	-0.5394	0.2156	20.33	-0.0422	0.0672	1.1208	0.075	-0.0788	-19.7
1984-10-01	0.745	1.432	5.085	-0.4687	#N/A	11.3	0.9559	0.0316	1.2648	10.5	7.7	0.7556	13.6043	17.46	0.1013	1.3816	0.1246	0.03	0.2181	12
1985-01-01	1.357	2.314	25.357	3.0616	#N/A	5.2	-0.3286	0.3359	0.3351	0.2	14.8	-0.825	-0.3108	8.93	0.3083	5.5362	0.6268	0.226	0.7221	2.3
1985-04-01	-0.158	-0.305	4.958	-3.2465	#N/A	6.7	0.778	-0.1913	0.362	1.4	5.3	-0.146	1.8298	14.89	-0.1759	-0.8323	-0.3024	-0.114	-0.3808	-2.8
1985-07-01	0.328	0.136	10.175	0.6619	#N/A	2.7	0.4465	0.7173	-0.3868	-1.6	18.1	-0.5777	-5.3006	16.96	0.0826	1.8148	0.3149	-0.16	-0.1239	0.8
1985-10-01	1.165	1.137	17.45	0.0862	#N/A	19.4	3.2655	0.7882	0.0577	9.3	14.1	0.9807	10.5951	19.89	-0.1477	1.4226	-0.00400001	0.016	0.0494	20.5
1986-01-01	0.701	-0.484	16.71	7.2118	#N/A	16.6	0.602	0.0888	0.2856	-2.6	20.3	-0.2857	-10.7192	20.76	0.052	4.2493	0.3868	0.113	0.5265	7.6
1986-04-01	0.669	0.643	-3.845	-1.3042	#N/A	16.8	3.1468	0.8065	1.031	1	19.5	0.569	3.781	28.13	-0.0186	6.9163	-0.3355	-0.192	0.1959	17.6
1986-07-01	0.513	0.807	24.849	-0.0862	#N/A	14.3	-1.7034	-0.1509	1.2961	3	56	-0.2342	-1.9717	28.92	0.2656	1.134	0.5905	0.069	0.0401	27.9
1986-10-01	0.457	1.22	30.548	3.1628	#N/A	16	-1.1815	0.046	0.3371	14.5	18	0.7472	11.9467	27.79	-0.0124	2.3392	2.0653	0.057	0.266	34.9
1987-01-01	1.339	0.231	33.252	-1.2039	#N/A	12.6	1.0759	-0.9111	-0.6444	8.5	15.9	-0.3074	-4.03	32.36	0.104	6.264	1.1007	0.452	0.6147	-12.7
1987-04-01	0.887	1.77	19.858	-1.6321	#N/A	17.9	1.3797	-1.2416	0.6012	16.6	22.1	-0.4516	7.1492	33.39	0.0735	4.8382	0.5963	0.515	0.7395	22.6
1987-07-01	0.863	1.725	36.856	0.1295	#N/A	8	1.475	-0.0377	0.5879	9.4	31.2	-0.1162	-0.6445	21.21	0.1364	1.4001	0.2638	-0.593	0.3079	19.1
1987-10-01	0.554	-2.427	36.708	2.2611	#N/A	-0.9	-0.5539	1.3681	-1.1935	15.9	6.2	-0.0726	-0.4413	8.78	0.2303	3.9001	0.2355	-0.29	0.9391	24.5
1988-01-01	-0.392	3.678	3.996	-4.79	#N/A	13.7	1.2726	-1.2088	1.3435	3.8	-0.1	0.3633	2.869	20.81	0.0508	6.1152	-0.0529	0.493	0.0451	-6.4
1988-04-01	0.581	1.327	-3.153	-0.2794	#N/A	18.4	1.692	0.8564	0.8454	10.9	24.8	-0.0898	13.4186	24.05	0.5447	6.7157	0.1145	-0.488	0.7392	20.9
1988-07-01	2.272	1.651	16.387	-0.7677	#N/A	23.7	2.309	0.9899	1.3291	12.1	29.3	0.2107	-1.4944	29.48	0.7371	9.4229	0.2731	-8.34465e-10	0.5626	34.8
1988-10-01	1.217	-2.537	-11.289	1.7615	#N/A	19.7	2.7542	0.0946	-1.3145	5.6	3.7	0.3505	1.4621	23.82	0.8562	-1.2524	-0.5922	-0.633	1.4725	30.9
1989-01-01	0.8302	4.953	30.147	6.1678	#N/A	22.5	2.677	-0.5756	2.1414	35.2	37.2	-0.5526	3.0407	13.93	-0.1127	13.9835	0.6271	0.429	1.466	37.6
1989-04-01	1.9012	3.154	16.263	-7.0079	#N/A	33.2	1.4281	0.4933	1.1619	12.5	22.6	0.4226	11.542	30.71	-0.2019	3.5035	0.8666	-0.045	2.34	-11.6
1989-07-01	0.9508	0.553	9.463	3.9314	#N/A	19.7	1.6711	-0.4096	1.2728	5.7	31	0.4047	-3.1516	31.26	0.2785	10.7948	0.2298	-0.044	3.4724	36.9
1989-10-01	0.6132	-5.496	14.077	2.8673	#N/A	41.8	-0.00740001	0.7662	-2.7988	16	29.6	0.6141	19.1711	38.31	1.5646	1.1301	-0.8728	-0.045	2.2708	43.7
1990-01-01	2.1002	7.5	26.202	-3.226	#N/A	25.2	1.995	3.3356	3.0604	24	26.9	0.678	0.1554	3.41	0.5403	22.0839	2.3669	-0.046	6.6574	-51.4
1990-04-01	-1.4791	0.867	6.885	1.2992	#N/A	15.4	-0.93	3.3934	1.22	2	10.1	0.329	4.6802	9.38	0.6949	2.6653	-0.7694	0.076	5.669	32.9
1990-07-01	0.11	-0.114	17.051	3.3987	#N/A	23.1	4.8411	2.3518	-1.0935	28.6	53.4	0.1987	6.7982	15.06	4.0398	4.3796	2.4531	0.08	0.8373	27.5
1990-10-01	1.3214	-5.212	23.726	3.3099	#N/A	24.8	0.7039	5.451	-3.4382	15.4	34.4	-0.2052	21.3185	9.95	-1.83	-0.3053	-1.5825	0.08	0.0983999	32.8
1991-01-01	2.2947	7.894	14.876	-2.3859	#N/A	21.7	4.9667	8.7476	6.8084	4.9	10.2	-1.0832	13.001	-16.49	0.222	13.6115	1.6581	0.08	1.8417	-4.1
1991-04-01	-0.0833001	0.378	22.756	1.2417	#N/A	0.8	2.2692	-2.2849	0.6877	-4.7	-0.4	0.7525	4.6075	-1.94	1.4264	-8.2014	1.3026	0.067	-1.5169	-0.9
1991-07-01	1.1493	-1.664	-8.162	3.2244	#N/A	0.4	-1.5453	0.5398	-0.0454	2.6	10.6	0.2851	5.6946	25.98	1.5297	2.6707	1.0015	0.066	0.4815	10.4
1991-10-01	2.0149	-2.129	22.122	1.474	#N/A	19.1	1.6993	3.0962	-4.1526	12.5	1.1	0.7984	16.5092	47.61	0.4776	3.3226	-1.1137	0.062	2.4526	26.9
1992-01-01	1.1604	6.112	20.91	-1.6641	#N/A	3.3	3.8517	8.655	0.2185	20.6	6.1	-0.0293	15.6049	-8.45	1.2375	2.4884	0.400715	0.057	-1.4064	-10.2
1992-04-01	0.7295	2.924	26.132	6.3144	#N/A	2.1	2.5305	1.7672	-0.2761	8.4	11.5	0.9114	20.9304	-35.86	1.5128	6.3874	0.400715	-0.06	2.9591	7.5
1992-07-01	1.446	4.91	42.396	5.3247	#N/A	-2.1	-7.0757	20.0315	1.9379	33.5	73.3	0.3289	20.2683	21.09	1.8548	24.0102	0.400715	-0.06	2.9573	10.3
1992-10-01	-0.3896	-3.969	23.369	-3.8474	#N/A	48.1	-1.159	12.8166	2.027	18.1	18.8	1.1156	-10.1597	10.62	0.3786	-11.6686	0.400715	-0.059	-4.5652	22.5
1993-01-01	1.5579	4.853	36.092	2.1152	#N/A	57.9	-1.5021	16.0919	3.0549	-1	45.4	-0.015	-7.0863	1.07	1.9424	9.3728	-2.07154	-0.058	1.4062	5.5
1993-04-01	0.5577	0.553	16.734	-2.6955	#N/A	38.8	2.5847	35.6107	-0.9055	-16.4	50.4	-0.5684	14.433	-41.47	0.6325	0.697	-2.07154	0.351	-4.9863	23.4
1993-07-01	0.8879	3.093	38.731	6.9731	#N/A	7.8	8.1156	12.7957	2.2906	53.3	23.3	0.4989	-0.0258	50	1.8911	6.8417	-2.07154	0.358	3.1541	39.2
1993-10-01	2.0285	-1.487	18.646	-0.8407	#N/A	52.7	5.612	14.0093	-2.004	8.6	82.9	-0.1071	25.284	39.07	1.9327	6.5931	-2.07154	0.359	-0.6385	47.1
1994-01-01	2.242	4.514	16.145	6.3233	#N/A	-7.7	-6.5685	-9.042	-1.0923	-5.8	-19.7	1.3	26.3349	20.41	1.3565	8.4809	-0.4081	0.37	0.7461	11.1
1994-04-01	0.7528	1.674	1.551	8.3073	#N/A	-11.5	-5.3793	-3.2259	-0.4837	-22	-15.4	1.3797	-7.1606	26.19	2.873	-11.3573	-0.3079	-0.073	1.2279	34.2
1994-07-01	-2.4229	-0.213	10.045	0.869	#N/A	13.3	-2.3576	-1.8459	1.6348	13.7	27.2	0.9802	-1.8505	39.07	2.9301	8.7037	1.0698	-0.076	1.6634	14.5
1994-10-01	-0.2401	1.045	1.953	3.6805	#N/A	48.5	3.345	6.4535	-0.1658	13	18.9	-0.8251	18.4917	41.42	2.6762	-3.5272	-1.5001	-0.079	2.2215	44.2
1995-01-01	1.0722	6.379	28.815	4.8973	#N/A	11.7	-3.7585	10.1884	1.8538	39.7	61.9	-1.4194	8.8792	17.53	4.7413	14.377	1.2164	-0.081	1.4032	40.1
1995-04-01	0.7569	-0.136	3.593	2.0621	#N/A	39.9	2.8504	4.6235	-1.8398	9.9	-7.5	-0.1165	-4.5895	53.23	3.5618	15.6001	1.3096	0.255	4.7028	100.3
1995-07-01	1.9506	2.659	11.504	0.3876	#N/A	16	0.4031	9.437	1.2429	1.9	62.2	0.1047	7.5705	57.78	4.2976	3.9366	0.1464	0.252	4.624	23.6
1995-10-01	2.5739	3.878	9.005	0.8415	#N/A	12.1	3.0054	13.0593	1.4023	-3.9	20	1.8882	21.9248	59.75	3.4036	-9.289	-0.1023	0.249	12.2318	79.7
1996-01-01	1.0027	4.233	38.651	1.4566	#N/A	9.1	1.2361	-1.536	3.3571	15.4	66.4	-1.2514	10.9312	-26.6	3.4504	30.9581	3.8951	0.256	12.9309	56.6
1996-04-01	3.73	0.553	2.567	11.8727	#N/A	14	3.5843	-5.1139	1.6514	-0.8	77.4	-0.1341	22.6553	38.9	3.048	5.0834	-0.6746	0.359	5.3861	52.5
1996-07-01	1.1156	2.795	20.723	3.5791	#N/A	-2.1	3.9127	6.0774	1.1397	19.9	58.7	-1.1216	16.2928	4.1	4.8885	14.1243	0.9888	0.365	7.7596	76
1996-10-01	3.3631	0.021	1.444	11.8169	#N/A	50.2	2.9545	1.7508	2.7207	-14	105.5	1.2766	44.104	77.3	7.7539	-26.7341	5.6916	0.372	-2.1128	143
1997-01-01	5.9205	4.452	39.725	13.6263	#N/A	50.2	4.4038	3.4046	2.5887	17	145.7	-2.2144	12.934	28.8	1.7036	35.6857	5.7179	0.368	8.8625	127.7
1997-04-01	-2.8017	10.756	37.618	5.547	#N/A	44.4	0.7666	4.5299	2.6573	20.3	95.4	-1.8632	39.9899	78.6	3.4706	-1.3809	-2.6671	0.089	4.5677	68.1
1997-07-01	1.1705	2.437	19.216	-4.4016	#N/A	28.4	7.9446	9.589	3.5514	34.3	20.7	1.2298	22.7223	35.8	2.1883	20.5007	2.0513	0.084	6.4493	97.4
1997-10-01	2.9233	-2.352	14.791	4.777	#N/A	50.6	1.1574	0.3423	-1.996	42.8	101	1.2593	12.1253	96	3.617	21.3534	8.9188	0.08	3.6087	86.5
1998-01-01	1.725	9.33	38.619	-2.4933	#N/A	67.8	8.3406	28.8694	0.1956	57.5	77.9	0.6114	41.3817	-78.4	-0.2328	44.088	3.4323	0.075	4.7392	32.2
1998-04-01	0.3111	2.132	35.323	0.7635	#N/A	67.4	0.1777	12.8271	0.5074	11.4	61.7	0.6108	49.5919	9.8	-0.3017	39.1453	5.5801	-0.101	6.0219	92
1998-07-01	0.2611	2.166	18.445	-2.5155	#N/A	32.4	7.8637	19.7962	1.6928	34.8	21.2	0.3761	19.2143	28.5	-2.4576	24.1032	1.9762	-0.304	7.4884	36
1998-10-01	2.5453	-1.907	0.38	5.406	#N/A	63.3	-7.0218	4.2986	1.1791	-24.5	-84.7	0.2434	19.8483	97.4	0.1079	18.4325	1.9915	0.209	2.8879	44.3
1999-01-01	5.7064	17.282	64.354	-15.0276	32.1824	110.8	9.8823	38.579	2.3453	114.8	141.6	0.7923	39.2364	-101.6	-0.4592	26.4902	5.6864	0.603	7.1317	20.2
1999-04-01	1.6493	9.888	39.852	-2.7738	31.1742	29.6	3.5418	13.6204	7.2313	36.9	41.7	1.7242	41.1815	-99.4	1.3804	30.6103	4.0866	0.172	31.3408	133.4
1999-07-01	2.1983	12.254	61.093	11.9121	26.3927	73.6	-0.0516998	7.6063	4.5382	-3.2	-56.3	-0.097	28.3889	14.8	2.083	29.967	3.0326	0.149	10.1065	61.3
1999-10-01	3.9386	1.415	54.937	6.7718	37.5364	49.6	-2.7459	15.0966	4.9086	3.8	-46.9	2.5699	37.4446	74.3	-2.3895	13.6621	3.182	0.045	-1.4419	72.9
2000-01-01	6.4231	16.647	82.678	4.465	84.5816	119.4	8.9758	13.1079	15.4242	26.1	183.8	3.3908	35.3387	-15.8	4.4381	61.2912	8.7954	0.336	17.6581	172.1
2000-04-01	-0.9514	12.247	32.911	17.9393	-24.2114	48.3	4.1536	12.5804	2.3414	5.9	88.1	1.3717	28.7639	28.5	-0.8841	27.2718	7.9777	1.2325	5.874	57.3
2000-07-01	3.3462	9.504	29.802	10.7968	44.0828	74.1	13.8983	25.4263	1.6466	37.1	124	1.9073	15.275	-2.3	-2.059	7.6502	8.5056	0.4749	-1.7226	44.8
2000-10-01	7.2461	5.117	16.457	10.5898	29.0574	30.7	-1.4209	30.5616	5.1386	25.5	73.9	0.2767	16.0141	77.1	2.0685	-2.2376	15.6103	0.0454	4.4444	126.7
2001-01-01	5.701	9.618	40.442	6.7901	37.7709	118.2	10.6678	17.9898	6.0738	72.1	332.2	1.7312	46.8892	6.4	-0.1153	80.6779	8.7487	2.4556	11.6027	181.1
2001-04-01	-0.4493	4.086	56.818	5.3487	-1.991	32.1	0.0948	4.6836	5.5248	47.5	-33.8	1.0115	18.0358	16.3	1.1158	-4.8102	11.6101	0.6933	5.3681	58.6
2001-07-01	0.1064	1.946	46.713	0.796	-33.5824	43.9	1.9295	0.3098	5.5383	-2.7	8.3	-0.899	-6.0859	-33.2	-2.3864	22.0565	8.2834	1.0656	5.8617	-80.8
2001-10-01	4.0786	4.031	51.15	18.6627	27.8898	23.4	-6.9741	13.5117	4.5806	30.4	29.2	1.9228	-1.7318	70.6	0.2617	32.7892	4.5819	-0.042	-5.1096	76.5
2002-01-01	7.7709	11.038	37.9468	11.6483	31.2793	48.6	13.6163	27.8206	7.7331	26.9	-19.8	0.3848	4.1524	-75.7	-0.8913	33.1862	7.4145	1.2122	8.5195	37.1
2002-04-01	5.834	3.913	53.5259	1.517	20.0152	69.8	-3.4767	22.7003	4.5922	29.7	8.8	0.6635	8.5762	32.9	-0.0659	8.2004	11.3141	0.4746	2.0038	101.7
2002-07-01	3.3436	-0.029	-32.0621	3.5695	-16.1365	71.5	4.0049	7.5582	4.2013	2	31.3	1.0208	2.8047	44.5	1.3378	20.3263	6.964	0.8346	-5.9666	-35.5
2002-10-01	3.7147	-3.833	35.7944	6.4002	43.0312	28.7	-2.9494	13.1956	-3.0385	56.9	79.8	2.0556	19.0239	47.9	3.6137	30.9772	9.6839	-2.3291	3.8313	33.2
2003-01-01	-1.9021	21.646	46.7301	17.2674	9.4992	101.6	21.4402	24.9215	6.1981	66.3	214.7	0.7581	35.2611	9.8	0.4958	55.8021	13.2017	0.156	13.5743	59.7
2003-04-01	5.1062	11.532	49.7318	-2.5417	20.8276	94.9	7.5637	25.0329	18.3623	72.4	148.4	1.3133	34.7552	21.4	5.1086	39.0631	16.5487	-1.0906	9.0541	110.7
2003-07-01	3.9242	4.359	22.6559	0.494	-5.4605	-1	-5.7942	25.8313	-8.1508	6.8	87.2	0.5464	12.7492	-31.1	2.3589	2.7928	-0.5028	-1.1277	-8.826	-40.4
2003-10-01	5.1494	-2.236	89.4415	9.8375	16.3227	35.2	8.0344	30.8684	6.0766	59.3	62.5	2.6527	8.745	26.3	2.8435	32.3143	15.2477	-0.5656	8.1458	47.4
2004-01-01	9.3926	29.147	112.916	0.8787	60.5268	117.2	13.618	26.7166	8.0223	134	469.7	3.3297	29.5872	-48.2	9.752	72.9028	13.1356	2.2309	15.3345	277.3
2004-04-01	8.2406	16.348	55.1561	14.2747	9.9845	9.6	5.3173	42.0011	16.0849	69.3	67.6	2.2893	-3.6066	125.1	7.9472	35.501	32.6038	-1.3582	8.1394	96.3
2004-07-01	7.6476	14.698	54.9339	0.79	-26.4328	123	4.3861	-0.8456	11.1589	14.3	204.6	-1.3719	23.8923	61.1	6.0178	42.5166	14.0903	4.723	9.5034	117.9
2004-10-01	5.4054	-5.728	99.9008	7.2504	32.1258	64.7	10.4672	29.0096	1.0954	131.3	160.4	5.7931	30.9859	83.8	-3.4968	42.717	-5.2821	-5.1164	10.0654	196
2005-01-01	4.3635	37.587	191.059	16.6424	13.9526	182.6	26.5798	34.5959	2.1084	89.2	493.5	3.7926	84.7937	-9.6	3.5475	93.6712	22.6184	3.5347	23.6493	75.7
2005-04-01	7.9784	30.8055	136.815	11.1267	73.0231	107.5	13.2647	42.8362	4.5781	136.6	275.1	4.9772	66.1497	122.1	4.3426	41.1965	14.3382	-4.1404	-6.4917	180.1
2005-07-01	9.9487	8.2979	131.796	26.124	62.4247	76.4	7.2675	33.5479	2.331	58.6	234.8	0.9854	21.678	86.6	7.52	42.3691	30.3934	-2.5505	12.0868	221.3
2005-10-01	10.7228	-2.6739	144.064	3.8762	-21.7124	53.2	5.1364	60.7469	12.4525	224.7	156.8	4.1452	23.3328	104	7.1384	-8.2308	7.4549	-1.6428	-3.0269	47.4
2006-01-01	18.2646	50.4558	187.898	31.6887	83.3655	180.7	12.5391	67.1365	14.9061	153.1	584.6	5.6614	96.1228	26.6	9.2845	123.105	39.8957	3.4835	51.5269	329.5
2006-04-01	19.5719	17.1046	78.7056	37.2788	20.2216	107.3	6.775	7.2588	11.8277	30	123.7	2.1942	49.673	44	11.7373	21.3499	33.5734	-3.1483	-2.1165	188.2
2006-07-01	22.9969	9.3036	109.194	27.7705	8.3724	61.3	15.8959	12.7787	-4.7935	156.5	246.6	3.7185	24.78	16.4	6.1699	54.0812	34.887	-0.0539	17.0341	224.2
2006-10-01	8.4196	29.9145	200.779	-0.5673	-12.9323	108.9	14.8687	39.0693	23.6377	131.8	170.8	7.491	28.6567	70.3	11.6591	90.7395	33.5839	0.6997	17.6992	301.3
2007-01-01	25.4852	28.9404	164.503	33.6113	230.719	183.3	19.7259	65.0535	8.897	264.4	798	2.1186	36.3072	113.1	17.2396	145.902	41.1632	3.5486	58.4363	386.2
2007-04-01	20.1465	52.8915	193.609	36.9931	-1.014	243.9	12.8522	32.5076	-0.2211	152.9	454.6	3.7974	93.0957	56.9	17.3636	43.073	20.7424	-1.3335	-6.2855	474.8
2007-07-01	27.2583	2.1638	103.884	10.3258	-5.4097	131.4	19.9509	-19.5895	5.011	1.5	282.3	0.683	-17.2347	134	14.6305	81.8843	34.1802	0.0275	17.0915	112.5
2007-10-01	14.2294	-17.3833	215.971	15.2303	85.8568	103.2	23.0061	-30.9538	15.9512	138	133.5	4.3411	-9.7404	80.2	22.1412	56.9795	16.7855	1.6399	26.9163	65.9
2008-01-01	15.8222	34.1124	75.6675	21.6154	-36.333	253.2	4.122	2.2195	9.457	232.8	337.9	1.5329	10.9325	144.8	5.0271	83.7385	12.9977	0.437	23.7237	145.8
2008-04-01	16.3016	40.616	86.7649	9.3081	-128.969	33.2	32.1985	40.6863	19.656	48	-697.3	0.8603	29.7148	-20.2	4.2967	53.4293	41.3207	-4.0948	-3.9069	-274.4
2008-07-01	11.0204	-5.972	42.6953	0.0883995	23.5186	97.7	-9.491	-16.4484	-3.763	-55.3	-108	-3.1221	-49.9848	44.8	0.1878	32.8577	31.2461	0.3965	19.8996	-180.4
2008-10-01	-5.7372	-26.8652	-384.603	-6.8929	-107.553	-178.4	-0.00330011	-53.9925	-7.9245	-125.3	-988.6	-8.6652	-124.748	-120.8	-19.9691	-239.243	23.9267	-1.5737	-15.4631	-357.2
2009-01-01	3.2358	-4.2317	-70.5712	11.2557	-11.8184	-63.1	4.8253	-41.5482	8.0591	-61.7	-92.9	-0.187	33.5955	-37.6	-7.0276	75.0082	-18.7696	-1.1424	-2.2603	-199
2009-04-01	16.9739	0.0191	-14.6273	2.0082	29.1565	83.5	-11.9336	11.6798	-0.2639	48.7	-122.1	-1.7725	13.3661	35.7	0.7136	-53.1521	-15.7894	-0.3132	11.3399	-117.8
2009-07-01	28.5868	5.2363	92.3609	10.6274	-72.9275	-74.7	-7.8878	9.9306	1.1395	102.1	-121	-0.8085	20.0701	-10	0.8358	15.9265	-4.4445	2.2223	-6.8821	173.7
2009-10-01	33.9624	-27.1557	36.2722	14.4038	-32.5541	19.1	1.8299	14.4587	41.8982	7.1	-45.7	6.5918	-70.3988	-36.6	-0.6738	-30.4205	-1.012	3.9958	-2.3377	-90.7
2010-01-01	18.5646	21.0728	126.768	33.3613	-19.2828	58.8	24.2292	-13.3201	-11.5808	149.6	192.6	1.3102	29.1641	77.3	3.2029	41.8689	18.9377	-2.2813	32.7143	155.5
2010-04-01	9.3275	5.0804	73.2855	5.7113	-50.6482	104.9	-8.3639	-21.0284	42.7829	-42.3	63.2	3.589	-33.0993	127.1	7.5517	-15.2935	51.3741	1.2708	11.0775	91.9
2010-07-01	7.5896	-14.2582	63.0482	-0.2353	-1.1583	100.9	16.7025	-34.6399	-27.3184	93.6	296.3	-0.542	0.1666	207.1	2.6255	87.1362	-11.6844	6.6161	6.8151	201
2010-10-01	27.8452	-24.1935	77.3513	17.5173	30.0181	122.4	-6.7421	8.8613	62.8292	21.1	-178.8	4.1915	-15.9502	-24.9	-2.1426	-52.709	13.8228	0.0325	-3.2783	158.7
2011-01-01	28.6609	36.5951	110.464	12.9185	-15.5758	23.4	6.9212	-0.9603	30.9495	85.8	115.7	2.5213	20.0342	167.5	9.586	100.062	42.5506	11.3315	31.7783	255.6
2011-04-01	43.537	-6.0325	164.959	26.9438	39.7454	81	-16.7834	1.937	6.9566	101.8	11.2	0.5148	-3.009	-14.2	3.1763	42.6077	-0.6649	-1.4843	12.0148	-148.7
2011-07-01	18.9176	-4.2268	113.169	-1.3023	3.7324	203.8	-4.2664	-7.2091	70.1865	-44.5	27.4	0.3688	20.0731	115.3	11.9543	69.9881	64.2018	-0.2871	28.5229	9.8
2011-10-01	-5.8772	-4.3438	-73.6239	16.2367	-19.6846	-88	4.4293	-4.5649	14.409	-278.6	-142.7	0.7124	-10.6424	-80.3	-0.9754	-58.1392	-18.9481	-4.9289	-1.2807	-76.5
2012-01-01	16.9043	2.3962	122.167	-0.5828	23.9965	289	20.4862	28.7438	17.1336	30.3	169.4	-2.8115	-3.028	88.2	5.9698	68.1995	41.0587	-0.945	21.4039	-189
2012-04-01	9.4713	-4.6003	146.684	4.5312	-45.2265	109	10.9325	32.6583	25.4468	-29.5	-208.4	2.5454	10.3039	55.3	5.4463	-48.5171	10.6072	0.038	15.2171	-267.1
2012-07-01	18.4807	-1.4916	27.404	34.2437	13.1719	5.7	-3.2591	-44.1236	5.2061	-78.8	-91.7	0.0562	-22.6119	83.6	11.7835	-19.9064	20.9347	-1.0032	26.2026	208.7
2012-10-01	20.9156	-12.4159	142.631	27.8608	-17.2825	-50	-1.7601	28.4183	-25.4235	-5.6	-130.8	5.2934	-9.191	35.5	8.1395	12.4431	-7.4036	0.9636	-21.1304	42.6
2013-01-01	12.0005	6.792	112.235	1.129	38.0627	-1.8	26.1918	-8.3054	-30.1681	103.6	-59.1	3.022	-9.9378	-28	12.1927	-19.1095	8.7929	1.0601	18.4244	138.1
2013-04-01	9.3702	10.2997	183.42	-1.6628	4.5233	36.5	-16.0845	-18.879	-5.2276	60	-73.4	3.7669	21.4157	-27.4	12.4518	28.2212	38.7154	1.0384	10.2277	81.1
2013-07-01	23.0434	-4.771	186.901	-7.5154	45.2641	-27.5	1.2195	-47.7936	-7.8954	-19.2	-231.7	-0.8005	9.3633	47.8	19.4136	8.3424	13.9443	0.0215	37.5027	-72.1
2013-10-01	29.4316	-14.4999	22.5486	27.6033	11.7919	-52.6	13.4814	2.5233	17.454	-95	-130.7	7.3911	-11.688	103	16.8872	-32.5573	30.2582	2.62	-10.2204	113
2014-01-01	17.6048	0.4465	192.428	12.8518	-0.7836	91.5	10.4187	29.8415	12.4531	155.8	203	4.8362	28.1199	-31.1	12.4394	89.5191	22.6735	-0.1664	35.6689	120.2
2014-04-01	35.9732	10.7808	185.358	23.3048	-13.3585	105.7	0.7239	39.092	12.2566	101.4	32.3	1.2925	47.2335	100.3	22.0747	48.0396	10.9026	3.6528	11.2937	134.2
2014-07-01	5.6288	-14.0059	105.089	11.6543	3.9358	63.5	2.2306	17.9746	3.8865	0.9	76	4.768	32.162	111	14.8637	-5.5038	0.8835	0.5216	-10.6062	230.3
2014-10-01	9.7881	-10.6146	49.9855	16.2608	-14.0583	1.4	5.247	0.6299	-12.0188	-42.8	-46.5	4.1686	51.302	43.9	24.4604	16.8011	46.0486	2.5451	-4.0074	-2
2015-01-01	36.4315	3.8345	204.883	10.6865	3.7797	213.2	-12.2965	51.164	29.8676	164.6	76.5	6.3573	75.6779	119.2	12.7522	61.3275	20.5057	1.796	26.2961	263.8
2015-04-01	25.3073	-9.3914	44.2816	10.8995	1.2956	-39.6	-6.3888	22.259	13.6048	-56.7	-197.1	-2.2316	20.2596	-19.5	25.3094	-22.3264	3.1507	1.5213	-8.0974	-45.4
2015-07-01	17.2734	-2.9782	83.6046	9.7238	-20.7738	74.7	9.8412	23.6259	-9.0611	-14.1	-41.6	-1.1508	13.3553	104.2	11.7969	21.1336	36.0873	0.2154	3.7067	-125.3
2015-10-01	25.7521	-8.9823	43.0595	40.6779	21.8781	-98.8	-2.8189	9.8804	-37.0749	-101.6	-71.2	2.7247	7.4577	59.6	2.7513	-55.3057	-26.3453	0.8115	-35.9295	-191.6
2016-01-01	-6.9533	11.0012	135.385	-4.9703	-70.2304	129.9	22.4604	10.5759	36.3494	140.1	-96.5	-0.2246	34.1355	132.5	11.3881	91.8305	7.0829	0.5766	30.7212	-36.6
2016-04-01	13.8984	-6.0854	104.566	44.6762	23.583	161.1	0.3048	29.0496	-9.8164	80.4	211.4	-1.8905	32.557	142.6	25.0532	97.7466	24.5337	0.63	-4.3612	245.8
2016-07-01	1.8264	-10.0217	105.64	12.5512	27.6305	22.2	7.2855	10.9742	-1.2205	58	-22.6	2.2087	-0.0793	120.6	25.9742	6.6205	-4.2268	-0.6122	1.3366	-57.5
2016-10-01	20.4759	-8.2237	-20.4723	23.6194	13.4197	-5	-1.2024	14.5096	-44.226	-45.5	-64	4.7801	15.2153	40.9	10.9531	-64.0527	-5.7178	4.4276	-21.3358	-118.5
2017-01-01	1.9438	14.9722	130.695	11.0945	-26.1452	197	23.3921	51.0879	43.4149	219.9	122	3.6571	67.079	-47.7	30.3545	49.0296	23.0578	-2.0349	58.4862	231.7
2017-04-01	18.1381	7.6047	90.6346	6.1028	50.2021	23	-11.1748	25.0967	-20.4754	32.5	21.1	-0.8086	23.6231	54.1	16.2727	-2.2935	-13.8995	0.5367	-11.5415	238.6
2017-07-01	7.1596	-2.1249	67.3398	5.598	-16.2462	45	13.3707	14.2809	14.2551	15.5	57.6	3.6637	33.1016	140.5	23.7466	-16.71	8.479	-0.7689	10.8643	269.2
2017-10-01	16.041	-6.7617	33.7432	70.8475	2.2156	10.3	19.6382	45.7732	-15.4214	-57.4	163.8	7.5133	34.4303	-36.8	20.6335	-19.8719	1.2422	1.0994	-9.3458	45
2018-01-01	45.4874	18.1616	145.652	-9.9637	-30.4604	149.6	-3.722	43.4785	14.6928	190.5	117.7	1.6526	50.238	141.7	23.5491	70.5016	5.0306	1.7445	15.4682	379
2018-04-01	18.9825	-1.7169	60.1255	9.516	-52.1769	66	-3.1099	39.405	-1.4298	108.6	-97.5	1.7183	19.7871	78.3	11.9435	-29.4239	11.5848	-0.327	18.2815	-121.4
2018-07-01	-16.8383	5.2133	-0.182301	24.9294	-32.9383	33.3	3.2396	33.8254	16.9772	23.8	-130.6	1.2948	38.7444	118.4	24.4249	18.582	15.3618	0.1404	-15.5962	35.6
2018-10-01	22.4821	-14.6021	-48.0013	44.2243	-3.2331	14.6	-14.0389	22.6867	-14.0508	-122.1	166.2	3.5259	-23.4378	-2.3	3.4345	-58.1173	4.9714	1.1976	-8.6978	212.1
2019-01-01	-1.2971	23.8035	104.865	-11.5146	-24.6955	90.5	7.9456	33.3496	57.7028	335.8	23.6	0.9418	5.5119	102.1	11.6299	35.6814	19.7031	2.1539	1.6483	96.2
2019-04-01	22.8496	7.8591	46.3829	40.2794	14.5223	68.1	13.596	35.0066	-2.6081	180.8	-56.2	3.3489	18.1264	11.3	25.9094	17.0431	17.8429	-0.3646	-11.9679	41
2019-07-01	34.5068	2.0927	104.059	26.2203	1.5088	5.8	10.9312	8.0794	5.2017	110.1	12	2.3637	41.2041	88.6	9.8927	81.4064	-3.9792	0.653	23.5949	114.8
2019-10-01	9.6391	-6.8352	34.9611	69.7839	-15.683	-81.9	-6.3531	47.4107	-47.5081	-316.3	-133.4	5.7035	27.6268	-24.2	7.3405	-69.5606	10.3243	0.5742	-16.0342	-4.3
2020-01-01	29.0997	11.1831	76.2773	-28.4045	8.4434	213.2	30.0092	69.6352	49.3485	479.7	679.1	6.3473	34.4724	437.4	26.0309	107.287	19.3242	0.4743	25.7608	840.2
2020-04-01	-22.1004	15.878	77.9453	2.3279	-61.6706	110.9	17.4065	46.6867	-12.3964	-169.7	-322	3.3793	20.3023	-178.2	-1.8102	-2.7623	-9.0434	0.4868	-4.1492	-305
2020-07-01	23.1196	-0.4968	35.6582	-4.9283	-1.0987	222.4	11.4559	-5.4378	-5.432	56.8	17.5	7.9426	24.7564	46.6	12.4205	15.5419	1.1883	2.843	15.8451	-145.9

## Sheet: Assets
	AUS	AUT	BEL	CAN	CHE	DEU	DNK	ESP	FIN	FRA	GBR	IRL	ITA	JPN	KOR	LUX	NLD	NOR	NZL	SWE	USA
1996-Q1	149827			467936					63919.2		2.44788e+06				103510
1996-Q2	155043			490805					64829		2.52632e+06				109966
1996-Q3	163857			500607					66631		2.59119e+06				111995
1996-Q4	170846		609439	547340	933888	1.69968e+06	149988	291280	68934.2	1.48234e+06	2.78292e+06		727498	2.61043e+06	121669		696815		696815	248580	4.7918e+06
1997-Q1	176249			564873					71254.1		2.84321e+06				119486
1997-Q2	173852			625560					73786.1		3.03208e+06				128199
1997-Q3	187503			648159					77730.2		3.12548e+06				125549
1997-Q4	182211		608200	639513	1.01951e+06	1.7728e+06	160211	313077	74735.5	1.69837e+06	3.26878e+06		809810	2.6686e+06	117563		746983		746983	262368	5.53651e+06
1998-Q1	188702			681963					74187.4		3.34147e+06				124334
1998-Q2	186500			707667					79635.1		3.39473e+06				132624
1998-Q3	178730			623640					83588.2		3.45412e+06				135455
1998-Q4	195906		702972	715131	1.21321e+06	2.23491e+06	192125	401437	90243.6	2.05267e+06	3.56775e+06		1.00253e+06	2.91669e+06	139460		957872	125687	957872	300446	6.36862e+06
1999-Q1	206481			733549				411969	96043.1	1.84228e+06	3.87784e+06		1.01636e+06		142091					324766
1999-Q2	217745			785087				434725	100748	1.94308e+06	4.01404e+06		999433		148986					352295
1999-Q3	215993			818937				456677	109244	2.06259e+06	4.13831e+06		1.08587e+06		151458					371910
1999-Q4	245276		762666	841286	1.21815e+06	2.51823e+06	225622	472931	117989	2.05705e+06	4.1476e+06		1.0843e+06	2.97335e+06	157055		1.06709e+06	151422	1.06709e+06	385852	7.61147e+06
2000-Q1	256628			871840	1.28219e+06			474600	139654	2.02792e+06	4.45297e+06		1.06366e+06		169545					361520
2000-Q2	258209			916736	1.28169e+06			492037	141346	2.05338e+06	4.54922e+06		1.10044e+06		174969				38902.7	402805
2000-Q3	252875			897565	1.27105e+06			503033	145052	1.9974e+06	4.52992e+06		1.037e+06		176926				36152.4	378689
2000-Q4	244977		757673	891304	1.35694e+06	2.72228e+06	256001	564749	159968	2.19961e+06	4.71382e+06		1.14572e+06	2.97232e+06	180878		1.13547e+06	193524	36395.7	416077	7.64233e+06
2001-Q1	236338			817694	1.32307e+06			554389	159426	2.16646e+06	4.85706e+06		1.10503e+06		174773				38119.6	378933
2001-Q2	250591			838571	1.30384e+06			551768	155967	2.1964e+06	4.75181e+06		1.08906e+06		174686				35605.2	385030
2001-Q3	248574			776538	1.30419e+06			578141	166506	2.36514e+06	4.86263e+06		1.15097e+06		176348				36279.2	395451
2001-Q4	273967		771750	848385	1.32298e+06	2.84446e+06	253228	581190	171570	2.40556e+06	4.81011e+06		1.09671e+06	2.88368e+06	177096		1.23899e+06	210470	42196.8	409419	7.1706e+06
2002-Q1	283938			862502	1.35466e+06			602393	179727	2.36602e+06	4.77113e+06		1.07357e+06		179310	2929.7			46999.4	417578
2002-Q2	296258			833975	1.4609e+06			688841	204017	2.65489e+06	5.12597e+06		1.18772e+06		185805	3926.46			52626.5	448237
2002-Q3	282860			770771	1.40543e+06			682776	205626	2.57985e+06	5.10067e+06		1.17877e+06		191166	3830.34			51729.4	416793
2002-Q4	308620		919531	806358	1.52518e+06	3.34678e+06	307886	742703	212638	2.77152e+06	5.36865e+06		1.24986e+06	3.05652e+06	201996	2.04239e+06	1.48974e+06	282515	55954.4	469430	7.06576e+06
2003-Q1	315264			813863	1.56282e+06			793029	225274	2.90375e+06	5.60587e+06		1.3242e+06		206634	2.1225e+06			58705.9	489202
2003-Q2	358553			899017	1.63452e+06			843854	258230	3.09804e+06	6.0418e+06		1.43299e+06		222482	2.22797e+06	3.32647e+06		62246	535842
2003-Q3	383989			928983	1.67054e+06			897298	259701	3.16681e+06	6.25852e+06		1.47638e+06		236834	2.27047e+06	3.43933e+06		61469	554676
2003-Q4	443537		1.24382e+06	1.0333e+06	1.78226e+06	4.25264e+06	393205	1.01027e+06	304146	3.5195e+06	6.67899e+06		1.61518e+06	3.60648e+06	254548	2.8106e+06	3.76952e+06	369891	69252.1	631198	8.62155e+06
2004-Q1	465545			1.07358e+06	1.82797e+06		4.27304e+06	1.01663e+06	304185	3.61664e+06	8.34888e+06		1.61322e+06		276657	2.86679e+06	3.7956e+06		73026.8	627644
2004-Q2	446697			1.10463e+06	1.86015e+06		4.253e+06	1.05102e+06	318974	3.70564e+06	8.11425e+06		1.61762e+06		288894	2.88695e+06	3.82017e+06		67635.8	636604
2004-Q3	457978			1.13388e+06	1.84127e+06		4.45493e+06	1.0728e+06	341918	3.81797e+06	8.44002e+06		1.67216e+06		305294	2.98913e+06	3.99076e+06		76634.9	667595
2004-Q4	546059		1.50046e+06	1.24307e+06	2.04662e+06		4.96003e+06	1.23184e+06	391144	4.3626e+06	9.56569e+06		1.89949e+06	4.17214e+06	327981	3.42261e+06	4.50552e+06	499303	81064.7	778532	1.05896e+07
2005-Q1	540548	640727	1.55511e+06	1.26422e+06	2.0304e+06	478998	4.99361e+06	1.22582e+06	377856	4.34833e+06	9.65824e+06		1.90694e+06		339178	3.41334e+06	4.49047e+06		83980.8	771453
2005-Q2	507987	645493	1.49892e+06	1.2925e+06	2.02978e+06	476954	4.90156e+06	1.21394e+06	377854	4.28264e+06	9.91239e+06		1.87682e+06		344844	3.41492e+06	4.36242e+06		79555.5	738781
2005-Q3	539782	658332	1.53543e+06	1.39573e+06	2.12714e+06	494257	5.01961e+06	1.24837e+06	381960	4.38935e+06	1.01101e+07		1.9199e+06		355053	3.61664e+06	4.48083e+06		77724.3	770874
2005-Q4	593379	651030	1.55757e+06	1.41106e+06	2.13018e+06	496724	5.01551e+06	1.30687e+06	387118	4.64014e+06	1.03063e+07	2.22185e+06	1.96629e+06	4.29488e+06	368169	3.78135e+06	4.52995e+06	579127	75965.6	789422	1.3357e+07
2006-Q1	641932	761294	1.64722e+06	1.52689e+06	2.31645e+06	517322	5.37505e+06	1.46189e+06	408671	5.01682e+06	1.09903e+07		2.12235e+06		387467	4.13943e+06	4.89596e+06		80511.1	860189	1.44671e+07
2006-Q2	682934	808845	1.68442e+06	1.57147e+06	2.44006e+06	535240	5.68818e+06	1.53883e+06	438695	5.30662e+06	1.16355e+07		2.2719e+06		409570	4.34859e+06	5.30913e+06		77177.7	895369	1.48063e+07
2006-Q3	716986	816556	1.7167e+06	1.61321e+06	2.5058e+06	565884	5.83619e+06	1.57362e+06	440368	5.51147e+06	1.22328e+07		2.27467e+06		425123	4.53161e+06	5.47512e+06		82069.3	943328	1.5276e+07
2006-Q4	794406	893429	1.89238e+06	1.70314e+06	2.56123e+06	597556	6.24572e+06	1.73444e+06	481911	5.96911e+06	1.28397e+07	2.93014e+06	2.43544e+06	4.69721e+06	462469	4.9174e+06	5.88318e+06	807226	91648.6	1.0351e+06	1.64105e+07
2007-Q1	859678	953931	2.03473e+06	1.79844e+06	2.88274e+06	626065	6.56109e+06	1.82068e+06	503536	6.39511e+06	1.35407e+07		2.49309e+06		476969	5.15979e+06	6.19452e+06		98362.9	1.07547e+06	1.73065e+07
2007-Q2	954838	1.02756e+06	2.17753e+06	1.9724e+06	2.95678e+06	654362	6.89571e+06	1.9359e+06	527281	6.55169e+06	1.46147e+07		2.6081e+06		511499	5.46774e+06	6.49968e+06		110670	1.11683e+06	1.88409e+07
2007-Q3	1.04383e+06	1.08122e+06	2.25599e+06	2.06701e+06	3.10632e+06	703444	7.36394e+06	2.00959e+06	562205	6.91275e+06	1.56512e+07		2.71986e+06		549968	5.84792e+06	7.0988e+06		113930	1.22559e+06	1.96821e+07
2007-Q4	1.01973e+06	1.13628e+06	2.45242e+06	2.08413e+06	3.32881e+06	739834	7.67634e+06	2.08984e+06	599260	7.34785e+06	1.6475e+07	3.67727e+06	2.87594e+06	5.36012e+06	590481	6.21175e+06	7.55466e+06	1.04188e+06	116310	1.31084e+06	2.07052e+07
2008-Q1	1.05046e+06	1.2472e+06	2.93423e+06	2.07123e+06	3.56605e+06	785913	8.31711e+06	2.21394e+06	653307	8.24362e+06	1.83751e+07		3.03602e+06		612630	6.44206e+06	8.22538e+06		121998	1.36723e+06	2.18871e+07
2008-Q2	1.11101e+06	1.28483e+06	2.98339e+06	2.08892e+06	3.36542e+06	810573	8.31888e+06	2.24953e+06	677130	7.84636e+06	1.75992e+07		3.07486e+06		618354	6.47033e+06	8.27475e+06		113370	1.36391e+06	2.10141e+07
2008-Q3	936484	1.16502e+06	2.81854e+06	1.71667e+06	3.17222e+06	733656	7.69508e+06	2.05547e+06	615012	7.30599e+06	1.64823e+07		2.73972e+06		591741	5.89891e+06	7.5581e+06		99554	1.23124e+06	1.84323e+07
2008-Q4	810274	1.09081e+06	2.58248e+06	1.52257e+06	3.02625e+06	710225	7.09631e+06	1.97988e+06	627270	7.35193e+06	1.67622e+07	3.39334e+06	2.53599e+06	5.7315e+06	532810	5.42054e+06	7.08173e+06	951685	89645.1	1.13952e+06	1.94241e+07
2009-Q1	782042	1.04149e+06	2.43217e+06	1.47954e+06	2.89865e+06	690224	6.72788e+06	1.83789e+06	619690	7.13582e+06	1.57821e+07		2.53021e+06		517600	5.08937e+06	6.92299e+06		87605.1	1.08659e+06	1.81481e+07
2009-Q2	939919	1.10928e+06	2.57829e+06	1.7038e+06	3.12581e+06	744569	7.30135e+06	1.95151e+06	644675	7.5298e+06	1.5088e+07		2.71613e+06		553415	5.53403e+06	7.21559e+06		96197.6	1.19112e+06	1.79328e+07
2009-Q3	1.06612e+06	1.17317e+06	2.69007e+06	1.89817e+06	3.26521e+06	791355	7.60642e+06	2.04264e+06	683822	8.09621e+06	1.51636e+07		2.89005e+06		597876	5.9351e+06	7.60769e+06		106939	1.30186e+06	1.97336e+07
2009-Q4	1.10649e+06	1.14772e+06	2.71954e+06	1.96679e+06	3.29487e+06	773815	7.5541e+06	2.03784e+06	713361	7.84814e+06	1.43544e+07	3.71543e+06	2.7885e+06	6.0417e+06	626548	6.08893e+06	7.5502e+06	1.09101e+06	108521	1.30065e+06	1.94271e+07
2010-Q1	1.15457e+06	1.12708e+06	2.54818e+06	2.01266e+06	3.26447e+06	801363	7.3084e+06	1.93813e+06	704802	7.82147e+06	1.51493e+07		2.68712e+06		637278	5.95143e+06	7.30361e+06		109853	1.29308e+06	1.97537e+07
2010-Q2	1.08153e+06	1.05539e+06	2.40849e+06	1.89474e+06	3.245e+06	750906	6.93594e+06	1.78887e+06	727759	7.39617e+06	1.53748e+07		2.45992e+06	6.14147e+06	639189	5.63249e+06	6.83932e+06		107504	1.21829e+06	1.97974e+07
2010-Q3	1.24345e+06	1.16261e+06	2.63416e+06	2.09243e+06	3.58954e+06	857539	7.72662e+06	1.94673e+06	812885	8.43717e+06	1.79085e+07		2.75815e+06	6.74993e+06	689985	6.29266e+06	7.84302e+06		125076	1.36587e+06	2.19674e+07
2010-Q4	1.33455e+06	1.07852e+06	2.59896e+06	2.25398e+06	3.67449e+06	822421	8.73934e+06	1.88824e+06	812162	7.69254e+06	1.5908e+07	3.71469e+06	2.66615e+06	6.90164e+06	693789	6.39475e+06	7.56803e+06	1.21572e+06	130385	1.42073e+06	2.17685e+07
2011-Q1	1.37865e+06	1.18771e+06	2.71721e+06	2.36273e+06	3.79997e+06	872995	9.04481e+06	1.96813e+06	862237	8.02094e+06	1.61093e+07	4.09349e+06	2.81911e+06	6.99697e+06	725198	6.81458e+06	8.23486e+06		145347	1.5358e+06	2.21499e+07
2011-Q2	1.4357e+06	1.21118e+06	2.77406e+06	2.32293e+06	4.04139e+06	880309	9.2481e+06	2.00338e+06	870962	8.27788e+06	1.61866e+07	4.13854e+06	2.87562e+06	7.11688e+06	747673	7.00958e+06	8.50904e+06		155185	1.52005e+06	2.24484e+07
2011-Q3	1.32655e+06	1.12779e+06	2.69388e+06	2.07402e+06	3.93956e+06	845822	9.33718e+06	1.91644e+06	941645	8.22027e+06	1.77979e+07	3.93353e+06	2.74476e+06	7.36355e+06	747898	6.54925e+06	8.24389e+06		149557	1.45845e+06	2.23011e+07
2011-Q4	1.35864e+06	1.08791e+06	2.61695e+06	2.18453e+06	3.80079e+06	830293	8.86244e+06	1.86654e+06	943175	7.71988e+06	1.70459e+07	3.87175e+06	2.66178e+06	7.50264e+06	756415	6.94192e+06	8.03575e+06	1.25816e+06	137772	1.43667e+06	2.22096e+07
2012-Q1	1.42448e+06	1.14583e+06	2.72014e+06	2.34115e+06	3.95692e+06	889815	9.46841e+06	1.95294e+06	999150	8.04479e+06	1.71924e+07	3.99538e+06	2.80283e+06	7.50838e+06	783778	7.54713e+06	8.43359e+06	1.38703e+06	144602	1.54166e+06	2.22754e+07
2012-Q2	1.4146e+06	1.08256e+06	2.6048e+06	2.24952e+06	3.89528e+06	865276	9.24821e+06	1.88546e+06	968894	7.7405e+06	1.6959e+07	3.86089e+06	2.69084e+06	7.61425e+06	789799	7.40814e+06	8.10355e+06	1.3235e+06	141336	1.47698e+06	2.15467e+07
2012-Q3	1.49281e+06	1.12051e+06	2.70086e+06	2.41789e+06	4.11275e+06	899050	9.57569e+06	1.88449e+06	1.00528e+06	7.98313e+06	1.72554e+07	4.02424e+06	2.79918e+06	7.86472e+06	830860	7.84013e+06	8.46363e+06	1.41444e+06	148939	1.58799e+06	2.23612e+07
2012-Q4	1.53161e+06	1.13859e+06	2.65156e+06	2.46198e+06	4.18961e+06	906913	9.63345e+06	1.94255e+06	958316	8.07001e+06	1.643e+07	4.11505e+06	2.81479e+06	7.6133e+06	855754	8.56967e+06	8.65231e+06	1.44277e+06	146479	1.52472e+06	2.25631e+07
2013-Q1	1.5522e+06	1.12196e+06	2.62591e+06	2.54236e+06	4.12673e+06	912684	9.30635e+06	1.95437e+06	883060	7.88885e+06	1.62267e+07	4.17625e+06	2.73406e+06	7.39383e+06	870332	8.66883e+06	8.55428e+06	1.44735e+06	151453	1.5809e+06	2.27269e+07
2013-Q2	1.49972e+06	1.13322e+06	2.61116e+06	2.52354e+06	4.11939e+06	899719	9.25358e+06	1.92453e+06	851193	7.83925e+06	1.61727e+07	4.20935e+06	2.74082e+06	7.22961e+06	873779	9.02256e+06	8.71478e+06	1.46163e+06	141882	1.56629e+06	2.20072e+07
2013-Q3	1.52732e+06	1.16825e+06	2.73832e+06	2.66845e+06	4.28482e+06	941768	9.48546e+06	1.94536e+06	868333	8.05098e+06	1.59e+07	4.30618e+06	2.86581e+06	7.42178e+06	922565	9.35944e+06	8.99427e+06	1.52909e+06	146529	1.66964e+06	2.30498e+07
2013-Q4	1.56161e+06	1.18603e+06	2.66037e+06	2.80376e+06	4.3605e+06	984256	9.58161e+06	1.9587e+06	894973	8.07835e+06	1.58334e+07	4.53742e+06	2.89279e+06	7.57531e+06	961681	9.82067e+06	9.25466e+06	1.59903e+06	147939	1.65744e+06	2.41459e+07
2014-Q1	1.6198e+06	1.19188e+06	2.5554e+06	2.84263e+06	4.39475e+06	1.06072e+06	9.73649e+06	2.00367e+06	909203	8.26928e+06	1.57935e+07	4.76872e+06	2.93011e+06	7.73764e+06	983511	1.01152e+07	9.48657e+06	1.65667e+06	158076	1.70713e+06	2.42143e+07
2014-Q2	1.68645e+06	1.20447e+06	2.57179e+06	2.95356e+06	4.4e+06	1.07522e+06	9.94564e+06	2.06131e+06	930593	8.43596e+06	1.59759e+07	4.90667e+06	2.9913e+06	7.99626e+06	1.04084e+06	1.02654e+07	9.61555e+06	1.67985e+06	164608	1.72809e+06	2.51401e+07
2014-Q3	1.64627e+06	1.11083e+06	2.4023e+06	2.88444e+06	4.18919e+06	1.04398e+06	9.47196e+06	1.96955e+06	895035	8.03978e+06	1.58779e+07	4.84099e+06	2.83925e+06	7.89082e+06	1.04967e+06	9.84256e+06	9.12126e+06	1.61179e+06	156967	1.62385e+06	2.47364e+07
2014-Q4	1.66093e+06	1.07937e+06	2.34855e+06	2.95687e+06	4.23574e+06	1.03489e+06	9.30294e+06	1.88622e+06	866274	7.93384e+06	1.59067e+07	4.99039e+06	2.8192e+06	7.71317e+06	1.07264e+06	1.08113e+07	9.04219e+06	1.57832e+06	156224	1.56788e+06	2.48841e+07
2015-Q1	1.67618e+06	1.00647e+06	2.39546e+06	2.9663e+06	4.24871e+06	1.02422e+06	8.93704e+06	1.83338e+06	866293	7.72465e+06	1.58064e+07	5.08423e+06	2.69961e+06	7.79911e+06	1.09462e+06	1.103e+07	8.81333e+06	1.55333e+06	163122	1.5082e+06	2.56491e+07
2015-Q2	1.64945e+06	1.01615e+06	2.38275e+06	3.02015e+06	4.37108e+06	985033	8.85815e+06	1.88292e+06	855446	7.53706e+06	1.5007e+07	5.21267e+06	2.78739e+06	7.62994e+06	1.13411e+06	1.1364e+07	8.96926e+06	1.57867e+06	162026	1.53366e+06	2.47902e+07
2015-Q3	1.58162e+06	997814	2.35763e+06	2.87702e+06	4.32171e+06	962901	8.88596e+06	1.88402e+06	841128	7.46714e+06	1.49388e+07	5.06104e+06	2.73654e+06	7.77575e+06	1.12698e+06	1.14282e+07	9.145e+06	1.50993e+06	151598	1.489e+06	2.35816e+07
2015-Q4	1.60843e+06	951581	2.30503e+06	2.98882e+06	4.36438e+06	929851	8.59334e+06	1.85199e+06	775652	7.08981e+06	1.42059e+07	5.29056e+06	2.66117e+06	7.78749e+06	1.14397e+06	1.13798e+07	8.9643e+06	1.48676e+06	156731	1.42758e+06	2.3432e+07
2016-Q1	1.6698e+06	981540	2.49566e+06	3.01838e+06	4.53642e+06	1.02173e+06	9.20887e+06	1.94094e+06	861554	7.60259e+06	1.48685e+07	5.49811e+06	2.81551e+06	8.36996e+06	1.17914e+06	1.17267e+07	9.60987e+06	1.54484e+06	168799	1.51646e+06	2.41602e+07
2016-Q2	1.67235e+06	961221	2.46749e+06	3.13315e+06	4.63401e+06	1.01885e+06	9.25972e+06	1.96371e+06	827763	7.62087e+06	1.51667e+07	5.37228e+06	2.79663e+06	8.84554e+06	1.2104e+06	1.17312e+07	9.5806e+06	1.56132e+06	172864	1.47206e+06	2.46306e+07
2016-Q3	1.70547e+06	964601	2.46523e+06	3.22799e+06	4.7793e+06	1.03727e+06	9.3071e+06	1.98826e+06	835226	7.66707e+06	1.44305e+07	5.48734e+06	2.83875e+06	8.94798e+06	1.25878e+06	1.194e+07	9.83106e+06	1.60119e+06	175336	1.49528e+06	2.48888e+07
2016-Q4	1.67915e+06	894438	2.36805e+06	3.30114e+06	4.76785e+06	991037	8.73031e+06	1.90961e+06	742800	7.07184e+06	1.35607e+07	5.37101e+06	2.66926e+06	8.44412e+06	1.24512e+06	1.15141e+07	9.28684e+06	1.5389e+06	171851	1.40525e+06	2.40315e+07
2017-Q1	1.74749e+06	933356	2.42664e+06	3.46801e+06	4.87366e+06	1.03783e+06	9.22564e+06	2.00734e+06	691434	7.28223e+06	1.34532e+07	5.65873e+06	2.80068e+06	8.51609e+06	1.31347e+06	1.19023e+07	9.68933e+06	1.61262e+06	175550	1.57886e+06	2.50418e+07
2017-Q2	1.7986e+06	987413	2.52738e+06	3.58031e+06	5.1316e+06	1.08511e+06	9.73944e+06	2.13482e+06	710614	7.65663e+06	1.39281e+07	6.07387e+06	2.99824e+06	8.72102e+06	1.35045e+06	1.26948e+07	1.0235e+07	1.65485e+06	187210	1.63082e+06	2.60387e+07
2017-Q3	1.82902e+06	1.01388e+06	2.59642e+06	3.70385e+06	5.19333e+06	1.13017e+06	1.00773e+07	2.23001e+06	754526	7.88785e+06	1.43148e+07	6.22875e+06	3.13381e+06	8.94225e+06	1.39944e+06	1.2913e+07	1.05305e+07	1.72497e+06	181477	1.68884e+06	2.70918e+07
2017-Q4	1.88284e+06	1.05422e+06	2.62392e+06	3.9556e+06	5.28119e+06	1.16976e+06	1.02415e+07	2.30505e+06	751308	7.89445e+06	1.46703e+07	6.32595e+06	3.21485e+06	8.97569e+06	1.4616e+06	1.32156e+07	1.0629e+07	1.75967e+06	183513	1.72315e+06	2.77398e+07
2018-Q1	1.91677e+06	1.09961e+06	2.63152e+06	3.91824e+06	5.37567e+06	1.20237e+06	1.05913e+07	2.4052e+06	787513	8.30778e+06	1.50948e+07	6.55863e+06	3.33597e+06	9.29925e+06	1.50551e+06	1.34036e+07	1.0979e+07	1.78759e+06	186158	1.7636e+06	2.76586e+07
2018-Q2	1.9165e+06	1.04343e+06	2.50388e+06	3.95493e+06	5.17254e+06	1.14952e+06	1.02439e+07	2.32147e+06	753217	8.1146e+06	1.44521e+07	6.42472e+06	3.20736e+06	9.19277e+06	1.5052e+06	1.29174e+07	1.06296e+07	1.75077e+06	184376	1.71489e+06	2.70696e+07
2018-Q3	1.88924e+06	1.03449e+06	2.43601e+06	4.09131e+06	5.1943e+06	1.14821e+06	1.02288e+07	2.3426e+06	772238	8.11177e+06	1.42118e+07	6.53241e+06	3.20976e+06	9.28325e+06	1.53808e+06	1.291e+07	1.05116e+07	1.77316e+06	180471	1.7151e+06	2.71894e+07
2018-Q4	1.82819e+06	974680	2.28078e+06	3.7426e+06	5.09394e+06	1.10111e+06	1.00509e+07	2.3093e+06	861576	7.926e+06	1.39838e+07	6.29848e+06	3.11704e+06	9.18526e+06	1.54622e+06	1.218e+07	1.00657e+07	1.66181e+06	175495	1.54749e+06	2.52179e+07
2019-Q1	1.90555e+06	1.00942e+06	2.3708e+06	4.0438e+06	5.14287e+06	1.15782e+06	1.03743e+07	2.3631e+06	924905	8.35693e+06	1.44144e+07	6.53525e+06	3.13428e+06	9.58875e+06	1.59776e+06	1.25272e+07	1.02663e+07	1.79008e+06	186433	1.61619e+06	2.6831e+07
2019-Q2	1.95131e+06	1.03982e+06	2.36893e+06	4.20734e+06	5.27797e+06	1.23054e+06	1.0823e+07	2.45133e+06	946078	8.77854e+06	1.46075e+07	6.75532e+06	3.23494e+06	9.86919e+06	1.64628e+06	1.25913e+07	1.03471e+07	1.84562e+06	188382	1.6166e+06	2.77394e+07
2019-Q3	1.99771e+06	1.01925e+06	2.36773e+06	4.22925e+06	5.25015e+06	1.25901e+06	1.06975e+07	2.39807e+06	940390	8.78709e+06	1.48151e+07	6.89869e+06	3.18946e+06	9.98415e+06	1.65686e+06	1.23213e+07	1.03518e+07	1.80601e+06	185780	1.60781e+06	2.80355e+07
2019-Q4	2.09121e+06	1.019e+06	2.40991e+06	4.50209e+06	5.49919e+06	1.25626e+06	1.07852e+07	2.49472e+06	922394	8.49639e+06	1.46087e+07	7.1683e+06	3.32165e+06	9.99271e+06	1.72103e+06	1.26406e+07	1.04693e+07	1.91879e+06	196031	1.65971e+06	2.91083e+07
2020-Q1	1.99421e+06	988073	2.25484e+06	3.862e+06	5.40372e+06	1.24083e+06	1.08203e+07	2.46065e+06	930606	8.98092e+06	1.62964e+07	6.73867e+06	3.14249e+06	1.03316e+07	1.68871e+06	1.18731e+07	1.0165e+07	1.66361e+06	186042	1.54394e+06	2.69397e+07
2020-Q2	2.07444e+06	1.03932e+06	2.32814e+06	4.34395e+06	5.47916e+06	1.35106e+06	1.13553e+07	2.5725e+06	943203	9.00612e+06	1.5734e+07	7.1615e+06	3.32594e+06	1.05104e+07	1.75278e+06	1.24534e+07	1.0543e+07	1.81447e+06	194191	1.6802e+06	2.87877e+07
2020-Q3	2.15417e+06	1.05494e+06	2.41625e+06	4.53442e+06	5.69886e+06	1.42958e+06	1.20393e+07	2.6686e+06	981069	9.40278e+06	1.59546e+07	7.55397e+06	3.53198e+06	1.07488e+07	1.821e+06	1.27306e+07	1.10437e+07	1.89494e+06	196698	1.77919e+06	2.95177e+07
2020-Q4	2.39277e+06	1.09701e+06	2.55497e+06	5.12541e+06	5.988e+06	1.52418e+06	1.28141e+07	2.84143e+06	1.00159e+06	9.8809e+06	1.68203e+07	8.30218e+06	3.77754e+06	1.1056e+07	1.96162e+06	1.35574e+07	1.14429e+07	2.12736e+06	229562	1.91971e+06	3.22563e+07
2021-Q1	2.3227e+06	1.08658e+06	2.5421e+06	5.34384e+06	5.90204e+06	1.4662e+06	1.24763e+07	2.78321e+06	1.03261e+06	9.72897e+06	1.65007e+07	8.41352e+06	3.66623e+06	1.08216e+07	1.98719e+06	1.34873e+07	1.11046e+07	2.16666e+06	227846	1.97315e+06	3.2838e+07
2021-Q2	2.37694e+06	1.10314e+06	2.63331e+06	5.69277e+06	6.06047e+06	1.52629e+06	1.28765e+07	2.91935e+06	1.05659e+06	9.92909e+06	1.66127e+07	8.79342e+06	3.80195e+06	1.0874e+07	2.07222e+06	1.39001e+07	1.13348e+07	2.26782e+06	234980	2.06827e+06	3.42733e+07
2021-Q3	2.35502e+06	1.09991e+06	2.61585e+06	5.70662e+06	6.04358e+06	1.51541e+06	1.28136e+07	2.89127e+06	1.063e+06	9.94699e+06	1.64397e+07	8.86713e+06	3.78516e+06	1.09766e+07	2.10275e+06	1.37454e+07	1.11397e+07	2.23614e+06	228276	2.06543e+06	3.44315e+07
2021-Q4	2.45899e+06	1.09806e+06	2.63709e+06	6.0341e+06	6.12905e+06	1.52024e+06	1.27958e+07	2.90052e+06	954077	9.64992e+06	1.6581e+07	9.20776e+06	3.78137e+06	1.10319e+07	2.15982e+06	1.38998e+07	1.09167e+07	2.34419e+06	237188	2.03565e+06	3.52107e+07

## Sheet: Liabilities
	AUS	AUT	BEL	CAN	CHE	DEU	DNK	ESP	FIN	FRA	GBR	IRL	ITA	JPN	KOR	LUX	NLD	NOR	NZL	SWE	USA
1996-Q1	361843			727045					114975		2.4776e+06				153917
1996-Q2	371790			739990					115964		2.56702e+06				164705
1996-Q3	382346			744594					119199		2.6818e+06				174461
1996-Q4	396728		543173	789400	630058	1.61188e+06	192368	402128	121999	1.4401e+06	2.87987e+06		762666	1.7194e+06	185198		659503			353142	5.1201e+06
1997-Q1	394866			803874					125498		2.91611e+06				191797
1997-Q2	389654			848034					129444		3.09097e+06				204845
1997-Q3	392568			866130					136648		3.20293e+06				203879
1997-Q4	367903		528921	844497	743900	1.6886e+06	201531	412922	123542	1.54453e+06	3.36197e+06		924403	1.70987e+06	193101		721850			360338	6.32474e+06
1998-Q1	384679			886748					132768		3.46871e+06				199572
1998-Q2	367836			896963					150594		3.53063e+06				199043
1998-Q3	364798			792323					152788		3.61737e+06				198191
1998-Q4	389991		604701	852496	888966	2.22793e+06	240180	532043	190716	1.92142e+06	3.76452e+06		1.18693e+06	1.76306e+06	208356		973799	112235		395405	7.40239e+06
1999-Q1	406655			855487				623162	202504	1.77529e+06	4.00813e+06		1.05662e+06		209438					431206
1999-Q2	428774			892681				633658	213913	1.85936e+06	4.06798e+06		1.06975e+06		227396					415072
1999-Q3	434177			909843				660027	227134	1.9603e+06	4.18695e+06		1.14374e+06		220981					424415
1999-Q4	462857		618294	918144	884033	2.45419e+06	247825	681303	333739	2.04452e+06	4.25577e+06		1.13856e+06	2.14423e+06	248746		1.09968e+06	132139		472056	8.61371e+06
2000-Q1	450287			941951	936839			695956	364637	2.02323e+06	4.52219e+06		1.11664e+06		266631					482952
2000-Q2	453976			1.0124e+06	928326			704808	358810	2.06462e+06	4.49892e+06		1.15441e+06		269583				81810.3	491042
2000-Q3	434870			980455	935963			709835	310879	1.96649e+06	4.49794e+06		1.09341e+06		243825				74489.9	462686
2000-Q4	441001		615972	933175	1.04873e+06	2.69065e+06	279265	775313	341959	2.1699e+06	4.68061e+06		1.21917e+06	1.81439e+06	223147		1.19542e+06	159347	77352.8	499307	9.17857e+06
2001-Q1	416538			870701	1.00504e+06			774173	255729	2.10635e+06	4.81442e+06		1.18586e+06		214255				73851.4	475912
2001-Q2	435171			908874	971393			764979	242934	2.1198e+06	4.7305e+06		1.15742e+06		220074				72489.4	461518
2001-Q3	421520			855727	950953			809621	229062	2.21489e+06	4.84875e+06		1.22721e+06		205564				72629.2	461406
2001-Q4	448376		653824	908534	973321	2.71911e+06	279776	819557	272640	2.29669e+06	4.84725e+06		1.15318e+06	1.5236e+06	234804		1.29257e+06	160358	75148.6	463610	9.46506e+06
2002-Q1	465358			931501	1.01037e+06			850316	262495	2.30018e+06	4.78744e+06		1.12637e+06		259225	4391.4			83866.8	460064
2002-Q2	501351			947595	1.09773e+06			977970	255605	2.56388e+06	5.09554e+06		1.30047e+06		264811	7662.46			94526	500117
2002-Q3	489900			895716	1.01993e+06			967604	247810	2.42536e+06	5.04301e+06		1.29074e+06		255945	9282.52			92280.9	475395
2002-Q4	529416		815759	911130	1.11256e+06	3.34686e+06	339941	1.10218e+06	268028	2.65694e+06	5.31224e+06		1.40663e+06	1.59436e+06	263078	2.0255e+06	1.60902e+06	217743	102461	530598	9.47613e+06
2003-Q1	557244			955418	1.09574e+06			1.17974e+06	268616	2.77155e+06	5.49379e+06		1.52359e+06		251823	2.10846e+06			108093	552645
2003-Q2	633952			1.06813e+06	1.16263e+06			1.2897e+06	307173	2.98504e+06	5.97982e+06		1.65295e+06		281802	2.21283e+06	3.30425e+06		116238	606007
2003-Q3	665442			1.08632e+06	1.21318e+06			1.34748e+06	305332	3.11584e+06	6.20656e+06		1.68189e+06		299251	2.25978e+06	3.40441e+06		117763	628139
2003-Q4	765989		1.11687e+06	1.1882e+06	1.33396e+06	4.23156e+06	421979	1.52346e+06	352759	3.5769e+06	6.62977e+06		1.82627e+06	1.99286e+06	317566	2.78636e+06	3.80269e+06	269795	131742	696384	1.09139e+07
2004-Q1	798999			1.20645e+06	1.3887e+06	4.27304e+06	4.23679e+06	1.53935e+06	359198	3.68608e+06	8.31941e+06		1.81459e+06		355292	2.85772e+06	3.80684e+06		139064	694634
2004-Q2	755350			1.20349e+06	1.42457e+06	4.253e+06	4.14416e+06	1.59116e+06	347963	3.78858e+06	8.16254e+06		1.8134e+06		342197	2.87531e+06	3.84459e+06		130531	710114
2004-Q3	792586			1.28563e+06	1.38342e+06	4.45493e+06	4.34017e+06	1.64596e+06	363211	3.8866e+06	8.56831e+06		1.89674e+06		349553	2.9855e+06	3.99584e+06		147698	742455
2004-Q4	919543		1.38873e+06	1.37865e+06	1.55284e+06	4.96003e+06	4.82111e+06	1.92929e+06	412104	4.43432e+06	9.6656e+06		2.1965e+06	2.38765e+06	388196	3.41583e+06	4.50915e+06	374222	161149	870687	1.29524e+07
2005-Q1	920110	690102	1.45201e+06	1.40074e+06	1.5362e+06	4.99361e+06	4.78325e+06	1.91499e+06	396548	4.41249e+06	9.7517e+06		2.24539e+06		414028	3.40798e+06	4.51751e+06		162486	866250
2005-Q2	888437	691028	1.38802e+06	1.41327e+06	1.56839e+06	4.90156e+06	4.64531e+06	1.88251e+06	409170	4.34185e+06	1.00327e+07		2.19013e+06		426722	3.40817e+06	4.39206e+06		157603	820945
2005-Q3	925930	704300	1.4295e+06	1.57083e+06	1.66162e+06	5.01961e+06	4.72453e+06	1.95736e+06	406307	4.46281e+06	1.02496e+07		2.23003e+06		472237	3.60883e+06	4.54761e+06		158305	848965
2005-Q4	982071	714115	1.43825e+06	1.56566e+06	1.67179e+06	5.01551e+06	4.65899e+06	2.00547e+06	415724	4.67421e+06	1.03822e+07	2.26915e+06	2.23771e+06	2.76313e+06	512040	3.77441e+06	4.5643e+06	413514	158188	853185	1.52149e+07
2006-Q1	1.01823e+06	793837	1.52459e+06	1.65393e+06	1.80876e+06	5.37505e+06	5.27707e+06	2.20286e+06	453130	5.09082e+06	1.11301e+07		2.42448e+06		547257	4.12768e+06	4.95835e+06		153082	938365	1.61227e+07
2006-Q2	1.08276e+06	849744	1.57077e+06	1.73437e+06	1.88825e+06	5.68818e+06	5.43695e+06	2.33964e+06	472365	5.4466e+06	1.18357e+07		2.571e+06		562797	4.33663e+06	5.35583e+06		149117	977825	1.64851e+07
2006-Q3	1.1314e+06	861779	1.60347e+06	1.72949e+06	1.95145e+06	5.83619e+06	5.53304e+06	2.43182e+06	468664	5.67139e+06	1.24394e+07		2.64021e+06		588853	4.52772e+06	5.54953e+06		163556	987209	1.72817e+07
2006-Q4	1.26073e+06	938798	1.77279e+06	1.75674e+06	2.07183e+06	6.24572e+06	5.82179e+06	2.70139e+06	512255	6.07664e+06	1.31015e+07	2.94258e+06	2.84513e+06	2.88904e+06	619176	4.90793e+06	5.90024e+06	603778	183821	1.07978e+06	1.82183e+07
2007-Q1	1.34428e+06	992160	1.9114e+06	1.83223e+06	2.3532e+06	6.56109e+06	6.14353e+06	2.87885e+06	541256	6.5099e+06	1.36659e+07		2.94237e+06		650363	5.1525e+06	6.25724e+06		190844	1.15139e+06	1.89607e+07
2007-Q2	1.48002e+06	1.06014e+06	2.02858e+06	2.06697e+06	2.40756e+06	6.89571e+06	6.5435e+06	3.04778e+06	583092	6.80364e+06	1.47761e+07		3.10142e+06		719255	5.46661e+06	6.66234e+06		213339	1.17084e+06	2.02623e+07
2007-Q3	1.59162e+06	1.11424e+06	2.10816e+06	2.25037e+06	2.50676e+06	7.36394e+06	7.04746e+06	3.23833e+06	639506	7.19287e+06	1.58988e+07		3.26809e+06		765973	5.85256e+06	7.23459e+06		216424	1.25042e+06	2.09135e+07
2007-Q4	1.58393e+06	1.17693e+06	2.31029e+06	2.26932e+06	2.67179e+06	7.67634e+06	7.24728e+06	3.44043e+06	673368	7.58702e+06	1.6767e+07	3.73177e+06	3.37759e+06	3.16517e+06	779416	6.22169e+06	7.69231e+06	815991	221545	1.30514e+06	2.1984e+07
2008-Q1	1.6441e+06	1.28653e+06	2.63048e+06	2.2334e+06	2.86769e+06	8.31711e+06	7.78966e+06	3.71394e+06	688371	8.442e+06	1.85806e+07		3.6154e+06		766425	6.442e+06	8.37278e+06		231736	1.37992e+06	2.37361e+07
2008-Q2	1.74446e+06	1.31583e+06	2.67686e+06	2.30305e+06	2.67041e+06	8.31888e+06	7.66517e+06	3.76109e+06	688722	8.06223e+06	1.78134e+07		3.64803e+06		758973	6.45176e+06	8.40037e+06		222020	1.37224e+06	2.28485e+07
2008-Q3	1.4827e+06	1.1844e+06	2.54757e+06	1.87253e+06	2.53025e+06	7.69508e+06	7.03018e+06	3.42136e+06	606315	7.58891e+06	1.65345e+07		3.2062e+06		697718	5.89436e+06	7.65052e+06		201232	1.24929e+06	2.17413e+07
2008-Q4	1.29534e+06	1.13168e+06	2.37267e+06	1.64386e+06	2.41543e+06	7.09631e+06	6.5023e+06	3.29829e+06	634422	7.72013e+06	1.65709e+07	3.57241e+06	3.02921e+06	3.24213e+06	603065	5.41188e+06	7.15659e+06	732794	179666	1.17431e+06	2.34187e+07
2009-Q1	1.26701e+06	1.06508e+06	2.20949e+06	1.60087e+06	2.2503e+06	6.72788e+06	6.18244e+06	3.12437e+06	621226	7.47038e+06	1.58342e+07		3.00079e+06		577306	5.10223e+06	7.01357e+06		177363	1.13845e+06	2.20041e+07
2009-Q2	1.49956e+06	1.13109e+06	2.31811e+06	1.83779e+06	2.4265e+06	7.30135e+06	6.62401e+06	3.37696e+06	655552	7.87525e+06	1.53697e+07		3.22933e+06		619479	5.56517e+06	7.27011e+06		198346	1.22712e+06	2.11322e+07
2009-Q3	1.7037e+06	1.19386e+06	2.41684e+06	2.07331e+06	2.57718e+06	7.60642e+06	6.95037e+06	3.56176e+06	680791	8.47045e+06	1.55432e+07		3.42297e+06		712110	5.9787e+06	7.64868e+06		218689	1.35011e+06	2.24031e+07
2009-Q4	1.78159e+06	1.16862e+06	2.42922e+06	2.17733e+06	2.62879e+06	7.5541e+06	6.79059e+06	3.54157e+06	698529	8.24282e+06	1.47904e+07	3.94293e+06	3.295e+06	3.12523e+06	727232	6.10433e+06	7.54224e+06	767169	219538	1.33761e+06	2.20541e+07
2010-Q1	1.83744e+06	1.13725e+06	2.28379e+06	2.2672e+06	2.61846e+06	7.3084e+06	6.59471e+06	3.32358e+06	684826	8.19202e+06	1.54066e+07		3.14825e+06		753584	5.9711e+06	7.27836e+06		218032	1.34584e+06	2.25227e+07
2010-Q2	1.71876e+06	1.06764e+06	2.15419e+06	2.15935e+06	2.56045e+06	6.93594e+06	6.24191e+06	2.98124e+06	689827	7.70234e+06	1.57011e+07		2.84679e+06	3.22973e+06	730825	5.63618e+06	6.83317e+06		214552	1.29069e+06	2.29781e+07
2010-Q3	1.9682e+06	1.1772e+06	2.35261e+06	2.35309e+06	2.80568e+06	7.72662e+06	7.03186e+06	3.33995e+06	770535	8.72861e+06	1.83528e+07		3.25147e+06	3.60404e+06	795033	6.30558e+06	7.75539e+06		232682	1.47482e+06	2.47136e+07
2010-Q4	2.08891e+06	1.09895e+06	2.32602e+06	2.55694e+06	2.93049e+06	8.73934e+06	8.0188e+06	3.19211e+06	762910	7.91908e+06	1.61338e+07	3.91535e+06	3.09961e+06	3.75126e+06	826441	6.40571e+06	7.47855e+06	830735	240504	1.45339e+06	2.42796e+07
2011-Q1	2.16168e+06	1.19281e+06	2.44304e+06	2.69784e+06	3.03173e+06	9.04481e+06	8.24089e+06	3.40996e+06	807161	8.27615e+06	1.63721e+07	4.34841e+06	3.32627e+06	3.79486e+06	871027	6.81849e+06	8.12284e+06		241614	1.55857e+06	2.47883e+07
2011-Q2	2.25843e+06	1.22874e+06	2.49182e+06	2.66855e+06	3.24488e+06	9.2481e+06	8.46502e+06	3.47351e+06	814700	8.59937e+06	1.63791e+07	4.36582e+06	3.38842e+06	3.89106e+06	900689	7.03813e+06	8.37733e+06		263211	1.55409e+06	2.52337e+07
2011-Q3	2.11469e+06	1.15751e+06	2.44107e+06	2.36093e+06	3.10018e+06	9.33718e+06	8.68611e+06	3.28514e+06	885888	8.46891e+06	1.81025e+07	4.17117e+06	3.1688e+06	4.13209e+06	817915	6.5663e+06	8.07699e+06		257833	1.48123e+06	2.64352e+07
2011-Q4	2.17283e+06	1.0956e+06	2.36698e+06	2.48219e+06	3.00773e+06	8.86244e+06	8.21398e+06	3.15703e+06	896950	7.92073e+06	1.73808e+07	4.10893e+06	3.05006e+06	4.08339e+06	838598	6.92557e+06	7.87127e+06	830648	248177	1.48514e+06	2.66643e+07
2012-Q1	2.28177e+06	1.14989e+06	2.47351e+06	2.60769e+06	3.18064e+06	9.46841e+06	8.79312e+06	3.25871e+06	980712	8.36279e+06	1.77609e+07	4.35833e+06	3.25936e+06	4.20786e+06	892608	7.50919e+06	8.23737e+06	919978	261091	1.58662e+06	2.6822e+07
2012-Q2	2.24868e+06	1.08908e+06	2.3649e+06	2.54301e+06	3.10624e+06	9.24821e+06	8.53764e+06	3.09302e+06	941105	8.02652e+06	1.76004e+07	4.20121e+06	3.07782e+06	4.10618e+06	878737	7.36296e+06	7.91106e+06	866826	255501	1.51783e+06	2.67673e+07
2012-Q3	2.35593e+06	1.12344e+06	2.4509e+06	2.76677e+06	3.28738e+06	9.57569e+06	8.82846e+06	3.13674e+06	973900	8.29777e+06	1.7952e+07	4.36598e+06	3.20496e+06	4.22764e+06	930738	7.79918e+06	8.2264e+06	923994	270188	1.6485e+06	2.73133e+07
2012-Q4	2.39578e+06	1.15199e+06	2.44355e+06	2.82387e+06	3.44711e+06	9.63345e+06	8.83278e+06	3.17611e+06	927434	8.42331e+06	1.72284e+07	4.45898e+06	3.30701e+06	4.15517e+06	953439	8.53088e+06	8.38945e+06	949126	269154	1.61744e+06	2.70802e+07
2013-Q1	2.4243e+06	1.11883e+06	2.42416e+06	2.81828e+06	3.4742e+06	9.30635e+06	8.52162e+06	3.12096e+06	856589	8.22356e+06	1.67168e+07	4.52798e+06	3.18663e+06	4.10705e+06	938538	8.69947e+06	8.2912e+06	907725	274904	1.66701e+06	2.77679e+07
2013-Q2	2.24519e+06	1.12729e+06	2.41017e+06	2.66851e+06	3.48507e+06	9.25358e+06	8.45819e+06	3.11254e+06	827366	8.26696e+06	1.66225e+07	4.5744e+06	3.23744e+06	4.12749e+06	898301	9.04084e+06	8.46316e+06	906889	257653	1.61847e+06	2.7471e+07
2013-Q3	2.30212e+06	1.16221e+06	2.5353e+06	2.77648e+06	3.65021e+06	9.48546e+06	8.58382e+06	3.2046e+06	854144	8.55269e+06	1.64738e+07	4.71333e+06	3.37356e+06	4.2922e+06	973113	9.31737e+06	8.74235e+06	930967	268300	1.72123e+06	2.79784e+07
2013-Q4	2.29038e+06	1.18026e+06	2.4265e+06	2.82916e+06	3.73527e+06	9.58161e+06	8.62473e+06	3.26502e+06	886485	8.56172e+06	1.63881e+07	4.89824e+06	3.41297e+06	4.48199e+06	1.00208e+06	9.77904e+06	8.97539e+06	957910	266846	1.75963e+06	2.95134e+07
2014-Q1	2.38859e+06	1.19018e+06	2.278e+06	2.89125e+06	3.79209e+06	9.73649e+06	8.72693e+06	3.358e+06	903858	8.8034e+06	1.63088e+07	5.18427e+06	3.49356e+06	4.6476e+06	1.00308e+06	1.00697e+07	9.22923e+06	978870	288658	1.81154e+06	2.96417e+07
2014-Q2	2.48908e+06	1.20043e+06	2.2784e+06	3.05452e+06	3.79652e+06	9.94564e+06	8.85097e+06	3.42704e+06	927030	8.97603e+06	1.65922e+07	5.35055e+06	3.53935e+06	4.94289e+06	1.06477e+06	1.02184e+07	9.32588e+06	965630	296831	1.767e+06	3.05487e+07
2014-Q3	2.39416e+06	1.09503e+06	2.12897e+06	2.94893e+06	3.60924e+06	9.47196e+06	8.36371e+06	3.21306e+06	894901	8.49992e+06	1.65137e+07	5.26135e+06	3.33575e+06	4.92624e+06	1.03693e+06	9.79833e+06	8.81695e+06	925678	274628	1.65606e+06	3.08772e+07
2014-Q4	2.35645e+06	1.06567e+06	2.06927e+06	2.92952e+06	3.71764e+06	9.30294e+06	8.27124e+06	3.08855e+06	874157	8.34142e+06	1.65898e+07	5.39726e+06	3.23114e+06	4.80269e+06	991777	1.07689e+07	8.6505e+06	867977	277297	1.5871e+06	3.18283e+07
2015-Q1	2.33757e+06	989964	2.18392e+06	2.84522e+06	3.85609e+06	8.93704e+06	8.04295e+06	2.91206e+06	864065	8.14848e+06	1.64305e+07	5.64795e+06	3.0787e+06	5.03597e+06	1.01618e+06	1.096e+07	8.37817e+06	829811	275752	1.51294e+06	3.25179e+07
2015-Q2	2.31176e+06	998913	2.17156e+06	2.87663e+06	3.94346e+06	8.85815e+06	7.76242e+06	2.96442e+06	840163	7.90436e+06	1.55691e+07	5.76976e+06	3.10568e+06	4.93892e+06	1.00292e+06	1.13153e+07	8.62264e+06	853198	260993	1.52535e+06	3.15627e+07
2015-Q3	2.20806e+06	984453	2.15814e+06	2.67418e+06	3.80289e+06	8.88596e+06	7.7068e+06	2.96801e+06	827880	7.86097e+06	1.55982e+07	5.62844e+06	3.12144e+06	4.93146e+06	944063	1.13755e+07	8.76295e+06	828520	247182	1.48968e+06	3.08812e+07
2015-Q4	2.29511e+06	943295	2.0998e+06	2.66561e+06	3.87299e+06	8.59334e+06	7.45456e+06	2.89505e+06	764676	7.39922e+06	1.49358e+07	5.86371e+06	2.99935e+06	5.07228e+06	939531	1.13425e+07	8.59165e+06	788270	258922	1.46084e+06	3.08922e+07
2016-Q1	2.42323e+06	977384	2.30166e+06	2.80093e+06	3.96259e+06	9.20887e+06	7.99262e+06	3.05084e+06	850799	7.93808e+06	1.5321e+07	6.04747e+06	3.1787e+06	5.34838e+06	955037	1.16744e+07	9.14455e+06	849008	276078	1.54989e+06	3.19147e+07
2016-Q2	2.42294e+06	958435	2.28357e+06	2.93681e+06	4.05503e+06	9.25972e+06	7.94102e+06	3.02225e+06	820732	7.93579e+06	1.54772e+07	5.90153e+06	3.07747e+06	5.78189e+06	960524	1.16979e+07	9.07913e+06	848564	285994	1.49404e+06	3.28363e+07
2016-Q3	2.47359e+06	959916	2.26811e+06	2.99785e+06	4.18231e+06	9.3071e+06	8.00894e+06	3.0769e+06	831674	8.01487e+06	1.47479e+07	6.01808e+06	3.09302e+06	5.913e+06	1.02622e+06	1.191e+07	9.28377e+06	865124	294179	1.50555e+06	3.28722e+07
2016-Q4	2.39004e+06	879011	2.12081e+06	2.99713e+06	4.16108e+06	8.73031e+06	7.43576e+06	2.91291e+06	730107	7.37813e+06	1.36155e+07	5.86787e+06	2.88405e+06	5.56488e+06	963995	1.14812e+07	8.82166e+06	802906	278747	1.42215e+06	3.21608e+07
2017-Q1	2.49323e+06	915864	2.16835e+06	3.08678e+06	4.28257e+06	9.22564e+06	7.72692e+06	3.04912e+06	686473	7.68621e+06	1.36228e+07	6.1937e+06	2.98439e+06	5.60776e+06	1.06778e+06	1.18738e+07	9.21428e+06	825888	279004	1.61764e+06	3.29973e+07
2017-Q2	2.53816e+06	974564	2.26957e+06	3.15859e+06	4.52906e+06	9.73944e+06	8.13997e+06	3.28388e+06	710590	8.14833e+06	1.41711e+07	6.68012e+06	3.18087e+06	5.76455e+06	1.11528e+06	1.26507e+07	9.73529e+06	835054	297075	1.67399e+06	3.38596e+07
2017-Q3	2.58834e+06	995122	2.33687e+06	3.27209e+06	4.51637e+06	1.00773e+07	8.41261e+06	3.40598e+06	754504	8.45229e+06	1.46707e+07	6.84372e+06	3.31426e+06	5.93877e+06	1.12676e+06	1.2843e+07	1.00371e+07	885072	289474	1.73598e+06	3.46602e+07
2017-Q4	2.66526e+06	1.03529e+06	2.32485e+06	3.37642e+06	4.59086e+06	1.02415e+07	8.50776e+06	3.49684e+06	748008	8.44865e+06	1.50336e+07	6.92199e+06	3.36819e+06	6.05905e+06	1.19992e+06	1.31594e+07	1.0088e+07	876360	289874	1.72801e+06	3.54128e+07
2018-Q1	2.65946e+06	1.08222e+06	2.41527e+06	3.27009e+06	4.6426e+06	1.05913e+07	8.69021e+06	3.64597e+06	798554	8.91545e+06	1.55427e+07	7.21281e+06	3.52237e+06	6.36012e+06	1.21509e+06	1.33368e+07	1.04103e+07	905586	294253	1.76039e+06	3.54443e+07
2018-Q2	2.6572e+06	1.02344e+06	2.28086e+06	3.31578e+06	4.42636e+06	1.02439e+07	8.31772e+06	3.49889e+06	769783	8.69336e+06	1.48682e+07	7.02732e+06	3.30242e+06	6.25633e+06	1.16994e+06	1.29057e+07	1.00895e+07	878350	288477	1.68359e+06	3.58467e+07
2018-Q3	2.60303e+06	1.01485e+06	2.21581e+06	3.41121e+06	4.4711e+06	1.02288e+07	8.2367e+06	3.49482e+06	786399	8.6973e+06	1.45542e+07	7.11034e+06	3.27454e+06	6.36335e+06	1.17964e+06	1.28749e+07	9.92754e+06	890158	284261	1.69395e+06	3.67295e+07
2018-Q4	2.55492e+06	948181	2.10005e+06	3.29292e+06	4.30906e+06	1.00509e+07	7.9372e+06	3.41252e+06	876624	8.44745e+06	1.4346e+07	6.97602e+06	3.20418e+06	6.10488e+06	1.11015e+06	1.21572e+07	9.42055e+06	860235	289599	1.50349e+06	3.49026e+07
2019-Q1	2.62833e+06	965333	2.16636e+06	3.52615e+06	4.40881e+06	1.03743e+07	8.12167e+06	3.44463e+06	937140	8.91636e+06	1.49328e+07	7.17983e+06	3.21292e+06	6.37899e+06	1.14065e+06	1.24919e+07	9.58752e+06	891562	298451	1.52205e+06	3.7074e+07
2019-Q2	2.66532e+06	996737	2.16891e+06	3.67942e+06	4.58901e+06	1.0823e+07	8.57154e+06	3.54181e+06	945476	9.39883e+06	1.51015e+07	7.44277e+06	3.29077e+06	6.55904e+06	1.16148e+06	1.25562e+07	9.6026e+06	903612	301016	1.54295e+06	3.83347e+07
2019-Q3	2.68616e+06	970980	2.15818e+06	3.7153e+06	4.59341e+06	1.06975e+07	8.44057e+06	3.43884e+06	937534	9.40972e+06	1.53931e+07	7.56265e+06	3.26981e+06	6.70402e+06	1.14079e+06	1.22875e+07	9.5322e+06	859462	294277	1.4992e+06	3.92492e+07
2019-Q4	2.75508e+06	958503	2.18901e+06	3.8958e+06	4.83782e+06	1.07852e+07	8.43334e+06	3.54276e+06	911501	9.18938e+06	1.5362e+07	7.86456e+06	3.34436e+06	6.72226e+06	1.20359e+06	1.25996e+07	9.64853e+06	921653	311636	1.57181e+06	4.03397e+07
2020-Q1	2.53939e+06	922974	2.08664e+06	3.36967e+06	4.72743e+06	1.08203e+07	8.44806e+06	3.44128e+06	923117	9.62046e+06	1.68179e+07	7.55578e+06	3.20476e+06	7.01201e+06	1.11076e+06	1.18242e+07	9.26997e+06	828888	293932	1.46797e+06	3.90566e+07
2020-Q2	2.73695e+06	973301	2.13562e+06	3.7266e+06	4.74137e+06	1.13553e+07	9.03229e+06	3.60277e+06	949630	9.72956e+06	1.62266e+07	7.96747e+06	3.34416e+06	7.11119e+06	1.19036e+06	1.24129e+07	9.60535e+06	863580	310729	1.57976e+06	4.17835e+07
2020-Q3	2.85788e+06	1.00644e+06	2.2113e+06	3.83419e+06	4.86265e+06	1.20393e+07	9.63745e+06	3.7434e+06	994516	1.01779e+07	1.63996e+07	8.3735e+06	3.5053e+06	7.28936e+06	1.25788e+06	1.26815e+07	1.00107e+07	886960	314920	1.69141e+06	4.32851e+07
2020-Q4	3.1571e+06	1.05368e+06	2.30578e+06	4.21e+06	5.12055e+06	1.28141e+07	1.01954e+07	4.00999e+06	1.01451e+06	1.07344e+07	1.74706e+07	9.09934e+06	3.73642e+06	7.61519e+06	1.49675e+06	1.35153e+07	1.03249e+07	987071	359890	1.83391e+06	4.62676e+07
2021-Q1	3.02743e+06	1.02114e+06	2.27222e+06	4.3844e+06	4.97323e+06	1.24763e+07	9.93258e+06	3.87743e+06	1.04206e+06	1.06473e+07	1.74754e+07	9.17681e+06	3.60535e+06	7.44416e+06	1.50968e+06	1.34339e+07	1.01414e+07	990427	343243	1.90904e+06	4.71385e+07
2021-Q2	3.04907e+06	1.03501e+06	2.34712e+06	4.6024e+06	5.16754e+06	1.28765e+07	1.02138e+07	3.9901e+06	1.07344e+06	1.09191e+07	1.76239e+07	9.5209e+06	3.69785e+06	7.34181e+06	1.58274e+06	1.38626e+07	1.03261e+07	1.00674e+06	343355	1.96154e+06	5.01793e+07
2021-Q3	2.98816e+06	1.0377e+06	2.33023e+06	4.59326e+06	5.13567e+06	1.28136e+07	1.01458e+07	3.93134e+06	1.07972e+06	1.08951e+07	1.74382e+07	9.54389e+06	3.6587e+06	7.55609e+06	1.49476e+06	1.37066e+07	1.02614e+07	999029	341117	1.93683e+06	5.07827e+07
2021-Q4	3.04632e+06	1.03078e+06	2.30957e+06	4.70023e+06	5.3986e+06	1.27958e+07	1.00314e+07	3.85627e+06	967580	1.06199e+07	1.75768e+07	9.87092e+06	3.63185e+06	7.39221e+06	1.5231e+06	1.3856e+07	1.00027e+07	1.01556e+06	347363	1.92961e+06	5.33119e+07
