# Supplementary figures and images for: Which Global Cycle? A Stochastic Factor Selection Approach for Global Macro-Financial Cycles
Source: publisher site journal article supplement (doi:10.1515/snde-2023-0093), 2024-08-08

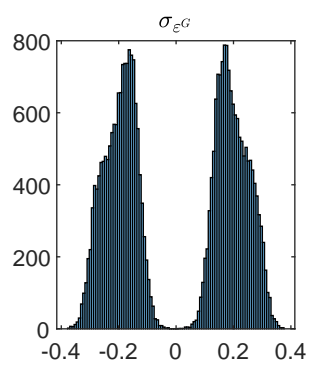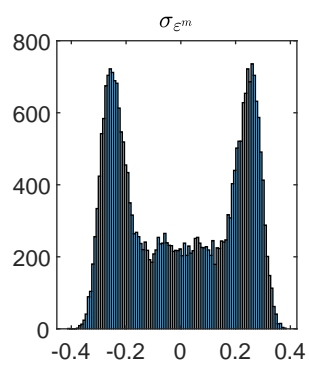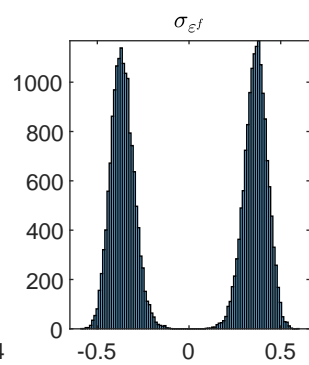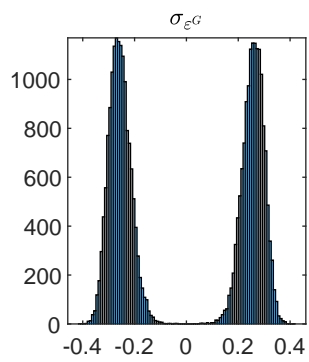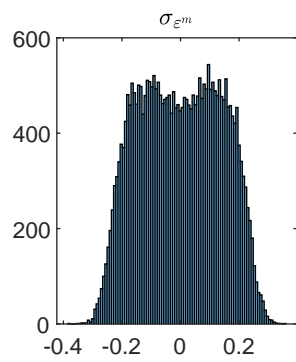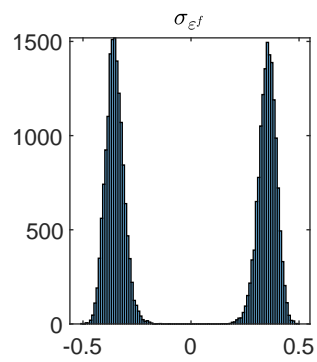

Supplement: Supplementary file 1 [file Figure_1.pdf › replication_code/figures/Figure_1.pdf]

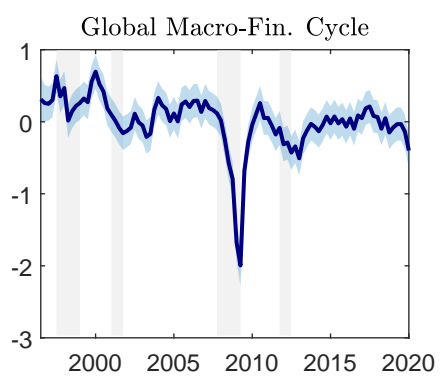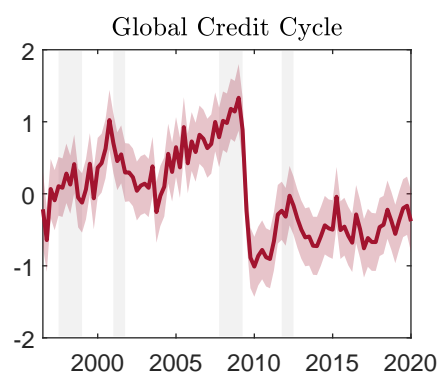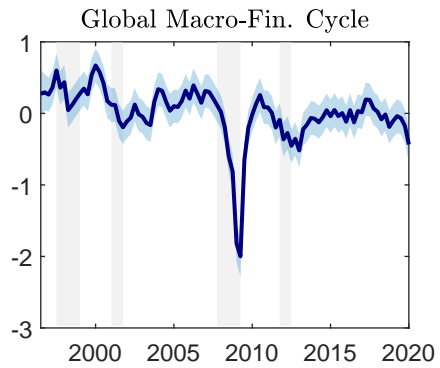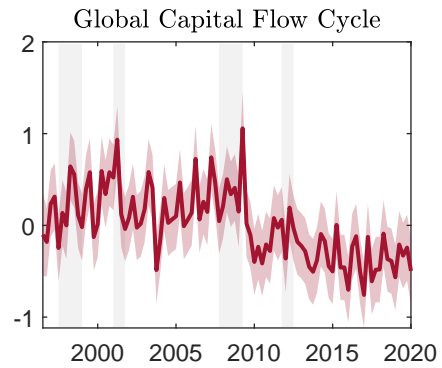

Supplement: Supplementary file 2 [file Figure_2.pdf › replication_code/figures/Figure_2.pdf]

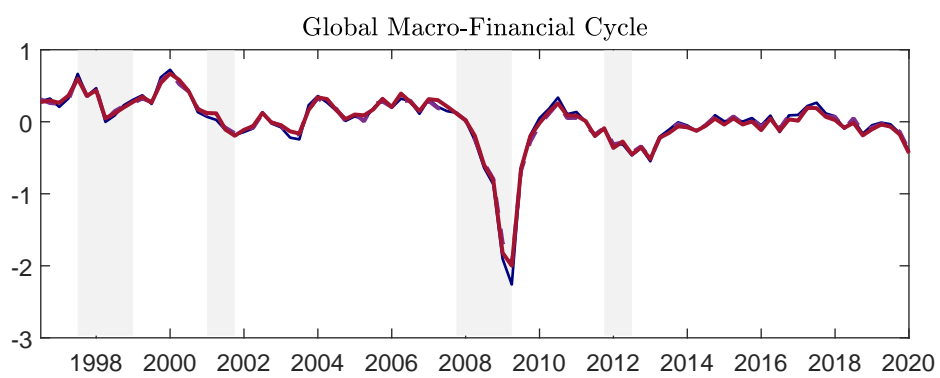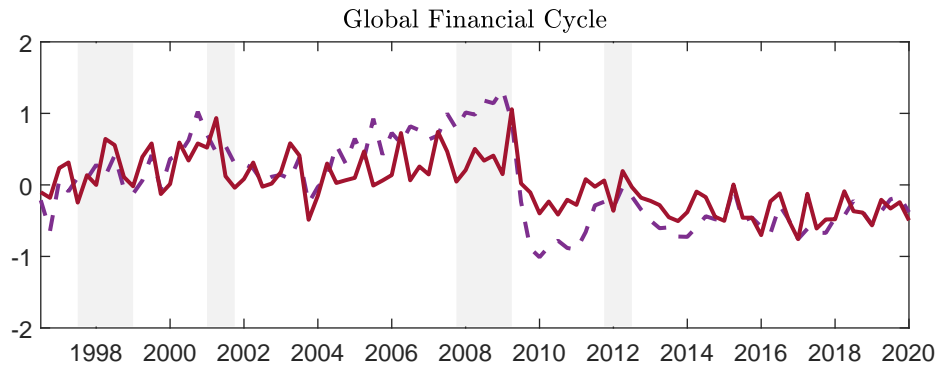

Supplement: Supplementary file 3 [file Figure_3.pdf › replication_code/figures/Figure_3.pdf]

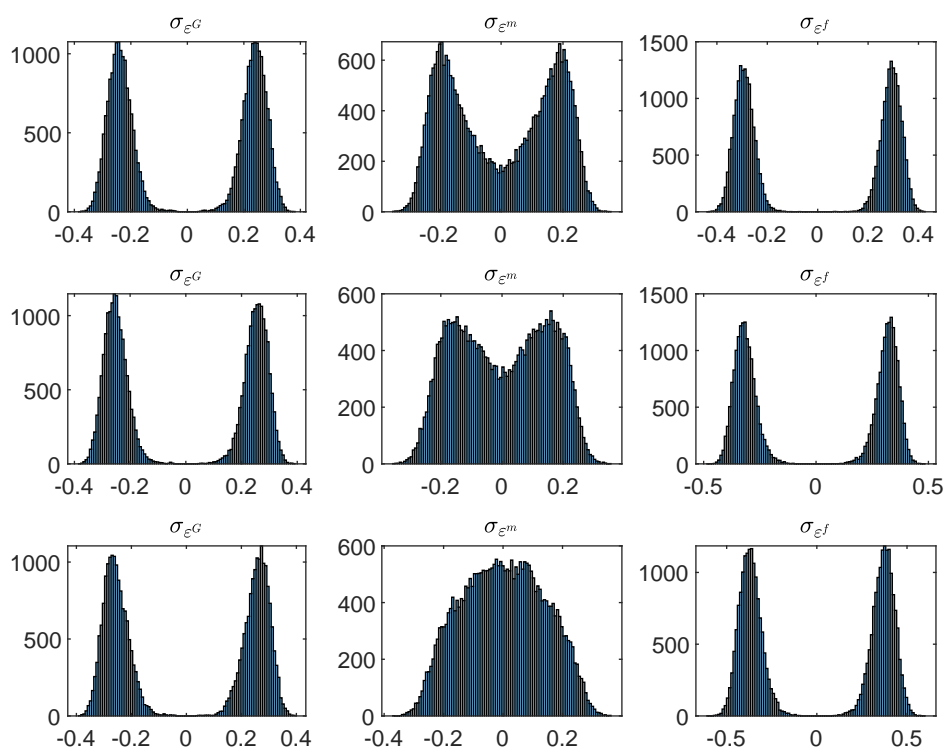

Supplement: Supplementary file 4 [file Figure_4.pdf › replication_code/figures/Figure_4.pdf]

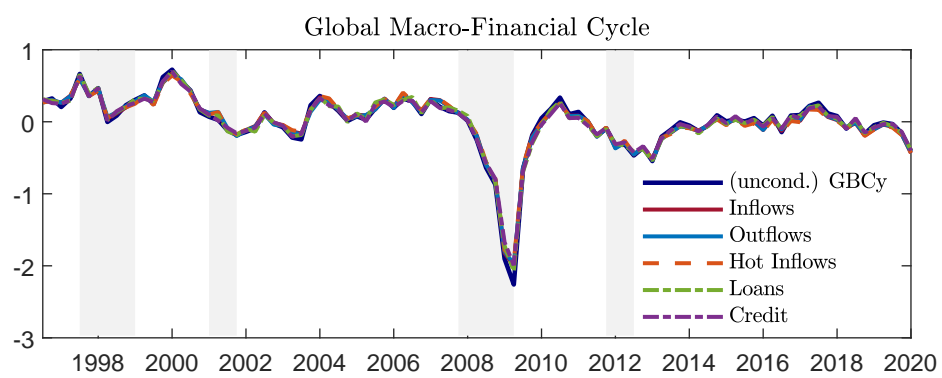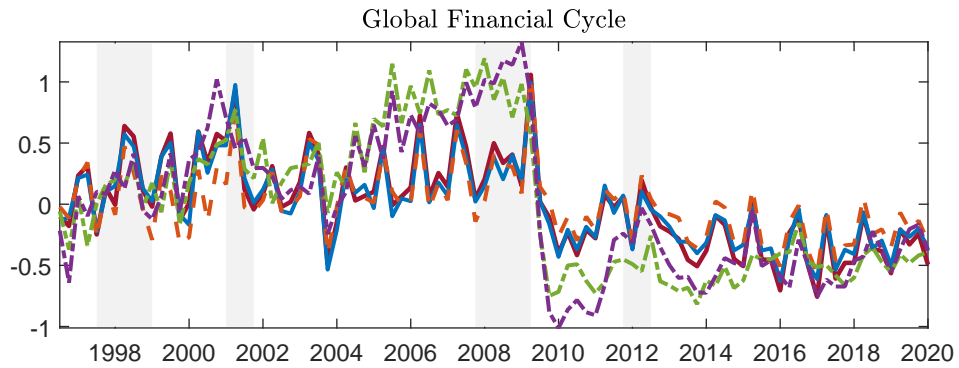

Supplement: Supplementary file 5 [file Figure_5.pdf › replication_code/figures/Figure_5.pdf]
